# Supplementary material for: Heat shock factors in tomatoes: genome-wide identification, phylogenetic analysis and expression profiling under development and heat stress
Source: PeerJ. 2016 May 10;4:e1961. doi: 10.7717/peerj.1961 (PMC4867723; doi:10.7717/peerj.1961)
Supplement: Supplemental Information 1 [file peerj-04-1961-s001.xlsx]

## Sheet: S1
Table S1. Sequences of SlyHSF genes in tomato
ID	Name	Gene	cDNA	CDS	Protein	HSF-Domain	env-Domain
SlyHSF-01	Solyc11g064990.1	ATGGCGTCACCCCAACCTAATTCGGAGTCGGTATTAGAACTTCCGAACAACGACAAATCTGGTATGAGTTTTTGCTCATCACTTTGATTCTTTGTTTCTTTTAAGCATATTATTAGAGGCGAAATGAATGTTGGTGTGATTACTGATTGAGTCAATTGCTTTGATTGTCGTCTTGGCTGTTAAACTTATGCATGTCTTATTTGAAATTGTTTACTGATATAATTCGCTGGCTTGCTATGGTGATGCTTTGTTAAATTCTCGTGCTCTTACTCTCTTTTCCTTAATGTGATTACTCGTCTTGGTGTTTGAAATAGTTGGTGAAGCATGGATTTGTAATGAGTTCAGAAGTATGATATAACACTGGAATTCGTAATTCTCATTCCTTATATATATCAGAGT…	ATGGCTTCTTCAAGTACTTGTGGTGATCAAGAGATGATTTTCACAATGCAAAAGGCAATGGTTGCACCCTTCTTGACAAAAACATATCAACTAGTGGATGATCCAAGTAGTGATCACATTGTTTCATGGGGTGAATATGAAAACACTTTTGTTGTATGGAGACCTCCTGAGTTTGCTAAAGATCTTCTTCCCAACTACTTTAAACACAACAATTTCTCCAGCTTTGTTAGGCAACTCAATACTTATGGATTTAAGAAGATAGTTCCAGAGAGATGGGAATTTGCAAATGAACATTTCAAGAAAGGACAAAAACACTTACTTTGTGAGATCCAAAGAAGAAGGAGCACACCTCAACAATTACATCATTTGACACCCTACCAAGAACACATCACAAGAAGT…	ATGGCTTCTTCAAGTACTTGTGGTGATCAAGAGATGATTTTCACAATGCAAAAGGCAATGGTTGCACCCTTCTTGACAAAAACATATCAACTAGTGGATGATCCAAGTAGTGATCACATTGTTTCATGGGGTGAATATGAAAACACTTTTGTTGTATGGAGACCTCCTGAGTTTGCTAAAGATCTTCTTCCCAACTACTTTAAACACAACAATTTCTCCAGCTTTGTTAGGCAACTCAATACTTATGGATTTAAGAAGATAGTTCCAGAGAGATGGGAATTTGCAAATGAACATTTCAAGAAAGGACAAAAACACTTACTTTGTGAGATCCAAAGAAGAAGGAGCACACCTCAACAATTACATCATTTGACACCCTACCAAGAACACATCACAAGAAGT…	MASSSTCGDQEMIFTMQKAMVAPFLTKTYQLVDDPSSDHIVSWGEYENTFVVWRPPEFAKDLLPNYFKHNNFSSFVRQLNTYGFKKIVPERWEFANEHFKKGQKHLLCEIQRRRSTPQQLHHLTPYQEHITRSIYHQEIQNPSSTVDHDILLALTQDNERLRKRNIVLLSELTRMKNLYNDIIYFIQNHVKPVEEKSRVFLLNGGLNHHHRQVHNEDHEEPKSDKVKLFGVSLCGKKRLYHERIDQEELEC	FLTKTYQLVDDPSSDHIVSWGEYENTFVVWRPPEFAKDLLPNYFKHNNFSSFVRQLNTYGFKKIVPERWEFANEHFKKGQKHLLCEIQRRRST	PFLTKTYQLVDDPSSDHIVSWGEYENTFVVWRPPEFAKDLLPNYFKHNNFSSFVRQLNTYGFKKIVPERWEFANEHFKKGQKHLLCEIQRRRSTP
SlyHSF-02	Solyc08g005170.2	CATCTCAGTCATCATCTCTCTTTCTAAAAACTTCACTCACTCGCACTTTCTCTCTCTATAAACCTAGGGTTTTTTCTCTACCTCCATCCATGGATGATATTCCAAATTCAATTGATGCATAGCATGTAGTGTATTTATCATCGGAGTTTGATTTCATTCGACCTCGACCCGAATAGTTCCGGTTTGAGGTAGGTTTTATCGTGAATGGAGCCGAATTCTTATGGCAGCGGGAAGGCTGCTGTCGGTGACGGAGTAGGAGCGCCAATGTTGCAGACGGCGCCGGCGCCGGCGCCGATACCCAGTGCGAATGCGCCGCCGCCGTTTCTGGTGAAGACGTATGATATGGTGGATGATCCGAGTACGGATAAGATCGTGTCGTGGAGTCCTACGAATAATAGT…	CATCTCAGTCATCATCTCTCTTTCTAAAAACTTCACTCACTCGCACTTTCTCTCTCTATAAACCTAGGGTTTTTTCTCTACCTCCATCCATGGATGATATTCCAAATTCAATTGATGCATAGCATGTAGTGTATTTATCATCGGAGTTTGATTTCATTCGACCTCGACCCGAATAGTTCCGGTTTGAGGTAGGTTTTATCGTGAATGGAGCCGAATTCTTATGGCAGCGGGAAGGCTGCTGTCGGTGACGGAGTAGGAGCGCCAATGTTGCAGACGGCGCCGGCGCCGGCGCCGATACCCAGTGCGAATGCGCCGCCGCCGTTTCTGGTGAAGACGTATGATATGGTGGATGATCCGAGTACGGATAAGATCGTGTCGTGGAGTCCTACGAATAATAGT…	ATGGAGCCGAATTCTTATGGCAGCGGGAAGGCTGCTGTCGGTGACGGAGTAGGAGCGCCAATGTTGCAGACGGCGCCGGCGCCGGCGCCGATACCCAGTGCGAATGCGCCGCCGCCGTTTCTGGTGAAGACGTATGATATGGTGGATGATCCGAGTACGGATAAGATCGTGTCGTGGAGTCCTACGAATAATAGTTTTGTGGTTTGGGATCCTCCGGAGTTTGCTAAAGACCTACTTCCGAAGTACTTTAAGCATAATAACTTCTCCAGCTTTGTTCGGCAGCTGAATACTTATGGTTTTAGAAAGGTTGATCCAGACCGCTGGGAATTTGCTAATGAGGGATTCTTAAGAGGTCAGAAGCACCTGCTTAAAAGTATAAGTCGACGTAAACCTGCTCAT…	MEPNSYGSGKAAVGDGVGAPMLQTAPAPAPIPSANAPPPFLVKTYDMVDDPSTDKIVSWSPTNNSFVVWDPPEFAKDLLPKYFKHNNFSSFVRQLNTYGFRKVDPDRWEFANEGFLRGQKHLLKSISRRKPAHGHAQQQQQPHGNAQQQMQPPGHSASVGACVEVGKFGLEEEVERLKRDKNVLMQELVRLRQQQQATDNQLQGMVQRLQGMELRQQQMMSFLAKAVNRPGFLAQFVQQQNESNKRIAEGSKKRRIKQDIESQDPSVTPADGQIVKYQPGINEAAKAMLRELSKLDSSPRLDNFSNSPESFLIGDGSPQSNASSGRVSGVTLQEVPPTSGKPLLNTASAIAGQSLLPATSEMQSSHLGTCSEIINNQLSNIIPLVGGEDLHPGSLSASD…	FLVKTYDMVDDPSTDKIVSWSPTNNSFVVWDPPEFAKDLLPKYFKHNNFSSFVRQLNTYGFRKVDPDRWEFANEGFLRGQKHLLKSISRRKP	PFLVKTYDMVDDPSTDKIVSWSPTNNSFVVWDPPEFAKDLLPKYFKHNNFSSFVRQLNTYGFRKVDPDRWEFANEGFLRGQKHLLKSISRRKPAH
SlyHSF-03	Solyc03g026020.2	TCCTTCTTTTTCGAATTTTCCAATTATCTTCCCATCTCTCTTTGTTCCTACCCACCCCACACCCACTCACCTCTATGTGGCGCCGGAAACTTCCAGAATCACCGAAAATTCCGACGGTCGTCCTCTCTGTAGTTTTGGCTCCAGATCTGTGAGAATAGCTTCATCGATCTTCACTCAAGTACGTAGTTTTGGTGTTACTATTATTTTTGCTGTATGTATTATATTAGCTAGAAAATGGTTTTTTGATGAGTTGATTCAATACGAACTTAATTAGTTCGTCAGGTAATAAGAAGAGATGACTCCACAGCCAATAGACCGGAACAAAGGAGAGACGACAGCCGGTGAAACGCCGAGGTCTGTGCCGACACCGTTTTTAACAAAGACCTACCAGCTCATCGA…	TCCTTCTTTTTCGAATTTTCCAATTATCTTCCCATCTCTCTTTGTTCCTACCCACCCCACACCCACTCACCTCTATGTGGCGCCGGAAACTTCCAGAATCACCGAAAATTCCGACGGTCGTCCTCTCTGTAGTTTTGGCTCCAGATCTGTGAGAATAGCTTCATCGATCTTCACTCAATTCGTCAGGTAATAAGAAGAGATGACTCCACAGCCAATAGACCGGAACAAAGGAGAGACGACAGCCGGTGAAACGCCGAGGTCTGTGCCGACACCGTTTTTAACAAAGACCTACCAGCTCATCGAGGATCAATCTATTGACGATGTGATCTCTTGGAATGAAGACGGATCTACTTTTATAGTGTGGAATCCAACGGAGTTCGCTAGGGATTTGCTTCCTAA…	ATGACTCCACAGCCAATAGACCGGAACAAAGGAGAGACGACAGCCGGTGAAACGCCGAGGTCTGTGCCGACACCGTTTTTAACAAAGACCTACCAGCTCATCGAGGATCAATCTATTGACGATGTGATCTCTTGGAATGAAGACGGATCTACTTTTATAGTGTGGAATCCAACGGAGTTCGCTAGGGATTTGCTTCCTAAATATTTTAAACATAATAATTTTTCTAGCTTCGTTAGGCAGCTCAACACCTATGGATTTCGGAAAGTAGTACCTGATCGATGGGAATTCGCAAACGACAGCTTCCGGAGAGGTGAGAGAAGTCAGTTAGTTGATATCCAGCGTCGAAAGGTTGCCACGCCGATTGCTACTCCTTCCGCAGCTGCAACAGCGGTGGCGATT…	MTPQPIDRNKGETTAGETPRSVPTPFLTKTYQLIEDQSIDDVISWNEDGSTFIVWNPTEFARDLLPKYFKHNNFSSFVRQLNTYGFRKVVPDRWEFANDSFRRGERSQLVDIQRRKVATPIATPSAAATAVAIVASPPQPPPPPPSPSPPPPPPAQPPVAVSTSDSCEEQVLSSNSSAGSTAELLGENERLRLENLQLSKELNQMKKLCGNIYGMMSTYAHPSSSGNQSAESSSPSLKPLDLLGTERSVGESQVKAVEDRESHEVPEEAQARLFGFSIGMKRVREGEQAMMEHCHDLRLRQPGTTDVKVEPSDQESNGESEERSWLLHCGGRNQRTCN	FLTKTYQLIEDQSIDDVISWNEDGSTFIVWNPTEFARDLLPKYFKHNNFSSFVRQLNTYGFRKVVPDRWEFANDSFRRGERSQLVDIQRRKV	PFLTKTYQLIEDQSIDDVISWNEDGSTFIVWNPTEFARDLLPKYFKHNNFSSFVRQLNTYGFRKVVPDRWEFANDSFRRGERSQLVDIQRRKVAT
SlyHSF-04	Solyc03g097120.2	CTTCTTTCTCCTTCTACTAGTTGCTTCTGTCCGGATCTCGATACTTCCATTTTCCGCATAATTTTTTTTTTTTTTACTTTTCTCTGTATCTGTGTTTATCTGGAGCTTGTGAATCGCTGGATTGAACTGAGAAAGCTGTGCAATTCTGAAGTGGAAAATGGACGGAGTTCATGAGGCTACGGTGGCGGGGAATTTGACGTCACCGCCTTTTCTGAACAAGACGTATGATATGGTGGATGATCCATCGACGGATTCTGTTGTGTCATGGAGTAAGAGTAACAATAGCTTTGTTGTTTTGAATGTGCCGGAGTTTGCTAGAGATATTTTGCCCAAGTATTTCAAGCACAACAACTTCTCCAGCTTCGTCAGGCAGTTGAATACTTATGTTAGTACAATTTT…	CTTCTTTCTCCTTCTACTAGTTGCTTCTGTCCGGATCTCGATACTTCCATTTTCCGCATAATTTTTTTTTTTTTTACTTTTCTCTGTATCTGTGTTTATCTGGAGCTTGTGAATCGCTGGATTGAACTGAGAAAGCTGTGCAATTCTGAAGTGGAAAATGGACGGAGTTCATGAGGCTACGGTGGCGGGGAATTTGACGTCACCGCCTTTTCTGAACAAGACGTATGATATGGTGGATGATCCATCGACGGATTCTGTTGTGTCATGGAGTAAGAGTAACAATAGCTTTGTTGTTTTGAATGTGCCGGAGTTTGCTAGAGATATTTTGCCCAAGTATTTCAAGCACAACAACTTCTCCAGCTTCGTCAGGCAGTTGAATACTTATGGTTTCAGGAAAGT…	ATGGACGGAGTTCATGAGGCTACGGTGGCGGGGAATTTGACGTCACCGCCTTTTCTGAACAAGACGTATGATATGGTGGATGATCCATCGACGGATTCTGTTGTGTCATGGAGTAAGAGTAACAATAGCTTTGTTGTTTTGAATGTGCCGGAGTTTGCTAGAGATATTTTGCCCAAGTATTTCAAGCACAACAACTTCTCCAGCTTCGTCAGGCAGTTGAATACTTATGGTTTCAGGAAAGTTGATCCAGACCGCTGGGAATTTGCGAACGAGGGATTTCTTAGAGGCTACAAACACCTATTGAAGAGTATAAGCAGGCGAAAACCCTCTCAGTTGCAGGGCCATCAACAAACCACCTCCAAAGTACCAAATGCATCTGTTGCATCCTGTGTTGAAGTT…	MDGVHEATVAGNLTSPPFLNKTYDMVDDPSTDSVVSWSKSNNSFVVLNVPEFARDILPKYFKHNNFSSFVRQLNTYGFRKVDPDRWEFANEGFLRGYKHLLKSISRRKPSQLQGHQQTTSKVPNASVASCVEVGKFGIEEEVERLKRDKDVLMQELVKLRQQQQETDHQLVTVGQRVQLMESRQQQMMSFLAKAMQSPGFVAQLVHQQNGNNRHITGLNKKRRLPEQAEENVACKPVNALQDGQVVRYQPSMTEAAKALLQQILRINASGRLDNRLHTNGGCLTNNPLPPNNSLGSSGASSCISSVTLSEVLSTSSQPNLISDSGFPFNSCSSIISETQSTTTVVPGEANIPILPEADALNSQAVHDLPEFSHTLGVTDVNMPETGNVPDMDTTKCILD…	FLNKTYDMVDDPSTDSVVSWSKSNNSFVVLNVPEFARDILPKYFKHNNFSSFVRQLNTYGFRKVDPDRWEFANEGFLRGYKHLLKSISRRKPS	PFLNKTYDMVDDPSTDSVVSWSKSNNSFVVLNVPEFARDILPKYFKHNNFSSFVRQLNTYGFRKVDPDRWEFANEGFLRGYKHLLKSISRRKPSQ
SlyHSF-05	Solyc02g090820.2	CATCCATTTTCAAAACCTTGAAGGATAAGAGAGAGAAAACAAATCAAGTTTTTTTAGAGCAAGAAAAGATAGTTATGGTCGTGTTGTTGTTGGTGAAGATTGGCAAAGTTGTAGCCAATGGAAGATTCTAAGATTATCATCAATCGTCCTAAAAATAATCTTGTTCATTCTCTAGTCTTTCTTTTCGGTTTCTATTGTTGGGATTGGGAATTTCTTACTGCCCTTTTGCTTTTCAGTTATTGCTCCTTCTAATTAATTTCTTTTAAATTTGTAAAATTCTTATAGGATCTTGTCAATTAATAAGTAAAATCCCCAAAAGGGGAAATTTGGGTAGATTTAGAGAAAGAGGGGATGTCGCAAAGAACAGCGCCGGCGCCGTTTCTGTTGAAGACGTATCAG…	CATCCATTTTCAAAACCTTGAAGGATAAGAGAGAGAAAACAAATCAAGTTTTTTTAGAGCAAGAAAAGATAGTTATGGTCGTGTTGTTGTTGGTGAAGATTGGCAAAGTTGTAGCCAATGGAAGATTCTAAGATTATCATCAATCGTCCTAAAAATAATCTTGTTCATTCTCTAGTCTTTCTTTTCGGTTTCTATTGTTGGGATTGGGAATTTCTTACTGCCCTTTTGCTTTTCAGTTATTGCTCCTTCTAATTAATTTCTTTTAAATTTGTAAAATTCTTATAGGATCTTGTCAATTAATAAGTAAAATCCCCAAAAGGGGAAATTTGGGTAGATTTAGAGAAAGAGGGGATGTCGCAAAGAACAGCGCCGGCGCCGTTTCTGTTGAAGACGTATCAG…	ATGTCGCAAAGAACAGCGCCGGCGCCGTTTCTGTTGAAGACGTATCAGTTGGTGGATGATGCGACCACTGACGATGTCATATCTTGGAATGAAATCGGCACAACCTTTGTGGTGTGGAAAACTGCTGAATTTGCAAAGGATTTGCTTCCCAAATACTTCAAGCACAATAATTTCTCCAGCTTCGTTCGACAGCTTAACACCTATGGTTTTCGAAAGATTGTGCCTGACAAATGGGAATTCGCCAATGAGAATTTCAAAAGAGGACAGAAAGAGCTCCTCACAGCTATACGCCGTCGGAAGACCGTGACATCAATCCCAGCTGGTGGAAAGTCTGTGGCAGCCGGGACTTCAGCATCTCCGGACAATTCTGGGGATGACATAGGTTCAAGTTCTACCTCG…	MSQRTAPAPFLLKTYQLVDDATTDDVISWNEIGTTFVVWKTAEFAKDLLPKYFKHNNFSSFVRQLNTYGFRKIVPDKWEFANENFKRGQKELLTAIRRRKTVTSIPAGGKSVAAGTSASPDNSGDDIGSSSTSSPDSKNPGSVDTPGKLSQFTDLSDENEKLKKDNQMLSSELVQAKKQCNELVAFLSQYVKVAPDMINRIMSQGTPSGSSLEELVKEVGGVKDLEEQGSYNDNDDKEDDDEKGDTLKLFGVLLKEKKKKRGPDDNIETCGGRGKMMKTVDYNGPWMKMSSTAGESSKVCN	FLLKTYQLVDDATTDDVISWNEIGTTFVVWKTAEFAKDLLPKYFKHNNFSSFVRQLNTYGFRKIVPDKWEFANENFKRGQKELLTAIRRRKT	PFLLKTYQLVDDATTDDVISWNEIGTTFVVWKTAEFAKDLLPKYFKHNNFSSFVRQLNTYGFRKIVPDKWEFANENFKRGQKELLTAIRRRKTVT
SlyHSF-06	Solyc09g065660.2	CGTTTTATCACTTACTTCCAAAGCTTCTTTTATCCATGGTGTCCATAACAATTTATTCACCAACTGCTTAACTGCATAAACTACCTTCCCAAAAGAGAAACTTTCCATCTCCAAAATCCAAAATCCAAAATTCAATTTAATTTTTTGTTCGTAAAAATACATATATTTTCCCCTGTTTGTTTGATGATGAATCAATTGTATTCTGTTAAAGAAGAGTTTCCAGGTTCAAGTTCTGGTGGTGGCGGTGGGGGTGAACCCCCACCGGCGACACCACAACCAATGGAAGGGCTTCATGACATTGGTCCACCACCATTCCTTACAAAGACATATGAAATGGTGGATGATTCAAGTACAGATCATATTGTTTCATGGAACAGAGGAGGTCAAAGCTTCGTCGTC…	CGTTTTATCACTTACTTCCAAAGCTTCTTTTATCCATGGTGTCCATAACAATTTATTCACCAACTGCTTAACTGCATAAACTACCTTCCCAAAAGAGAAACTTTCCATCTCCAAAATCCAAAATCCAAAATTCAATTTAATTTTTTGTTCGTAAAAATACATATATTTTCCCCTGTTTGTTTGATGATGAATCAATTGTATTCTGTTAAAGAAGAGTTTCCAGGTTCAAGTTCTGGTGGTGGCGGTGGGGGTGAACCCCCACCGGCGACACCACAACCAATGGAAGGGCTTCATGACATTGGTCCACCACCATTCCTTACAAAGACATATGAAATGGTGGATGATTCAAGTACAGATCATATTGTTTCATGGAACAGAGGAGGTCAAAGCTTCGTCGTC…	ATGAATCAATTGTATTCTGTTAAAGAAGAGTTTCCAGGTTCAAGTTCTGGTGGTGGCGGTGGGGGTGAACCCCCACCGGCGACACCACAACCAATGGAAGGGCTTCATGACATTGGTCCACCACCATTCCTTACAAAGACATATGAAATGGTGGATGATTCAAGTACAGATCATATTGTTTCATGGAACAGAGGAGGTCAAAGCTTCGTCGTCTGGGATCCTCATTCCTTTTCGACTACACTACTTCCTAAATTCTTCAAACACAACAATTTCTCCAGCTTTGTTAGACAGCTTAATACTTATGGATTTAGAAAGATTGATCCAGAGAGATGGGAATTCGCAAACGAGGCATTTCTAAAGGGGAGTAAGCATCTTCTAAGGAACATCAAGAGGCGAAAA…	MNQLYSVKEEFPGSSSGGGGGGEPPPATPQPMEGLHDIGPPPFLTKTYEMVDDSSTDHIVSWNRGGQSFVVWDPHSFSTTLLPKFFKHNNFSSFVRQLNTYGFRKIDPERWEFANEAFLKGSKHLLRNIKRRKTPNSSQPLPSTEQGLGPCVELGRFGFDGEVDRLRRDKQVLMTELVKLRQNQQNTRAYLRSLEVRLQGTERKQQQMMNFLARAMQNPEFVQQLIQQKGKRREIEEDITKKRRRPIDPQGPSATLHVGGSSHSIKSEPLEFGEANEFQVSELEALALEMQGYGRARKDQQEEYTIEGLEQFGNTDKELDVGFWEELFNDEDVSGNEDGEEEDVDVLAESEFSSIQRRMKKAAIWIDQLLVG	FLTKTYEMVDDSSTDHIVSWNRGGQSFVVWDPHSFSTTLLPKFFKHNNFSSFVRQLNTYGFRKIDPERWEFANEAFLKGSKHLLRNIKRRKT	PFLTKTYEMVDDSSTDHIVSWNRGGQSFVVWDPHSFSTTLLPKFFKHNNFSSFVRQLNTYGFRKIDPERWEFANEAFLKGSKHLLRNIKRRKTPN
SlyHSF-07	Solyc04g078770.2	TTGTTAACATTTTTTCTTGTCATCTTCAATATTCAAGAATTTTCTTTGTTTCAAATGGCTTTAATGCTAGATAATTGTGAAGGCATATTACTTTCATTAGACTCACATAAATCAGTTCCAGCTCCATTTTTAACAAAAACATATCAACTTGTTGATGACCCTTCTACTGACCATATTGTTTCTTGGGGTGAAGATGATTCTACTTTTGTTGTTTGGCGTCCACCTGAATTTGCTCGTGATTTACTCCCTAATTACTTCAAACACAACAATTTCTCCAGCTTCGTACGTCAACTCAATACTTATGTAAGTATTTTTCATTTTAAACATTCTTCGTCTTTTGGTTTAGTTATAGTACTGATTATACATAAAAATACAATTCTTGATCTATTAGGGTTTCAG…	TTGTTAACATTTTTTCTTGTCATCTTCAATATTCAAGAATTTTCTTTGTTTCAAATGGCTTTAATGCTAGATAATTGTGAAGGCATATTACTTTCATTAGACTCACATAAATCAGTTCCAGCTCCATTTTTAACAAAAACATATCAACTTGTTGATGACCCTTCTACTGACCATATTGTTTCTTGGGGTGAAGATGATTCTACTTTTGTTGTTTGGCGTCCACCTGAATTTGCTCGTGATTTACTCCCTAATTACTTCAAACACAACAATTTCTCCAGCTTCGTACGTCAACTCAATACTTATGGTTTCAGAAAAATCGTACCGGATCGATGGGAGTTCGCTAATGAGTTTTTCAAGAGAGGCGAAAAGCATTTATTATGCGAAATCCATCGGAGAAAA…	ATGGCTTTAATGCTAGATAATTGTGAAGGCATATTACTTTCATTAGACTCACATAAATCAGTTCCAGCTCCATTTTTAACAAAAACATATCAACTTGTTGATGACCCTTCTACTGACCATATTGTTTCTTGGGGTGAAGATGATTCTACTTTTGTTGTTTGGCGTCCACCTGAATTTGCTCGTGATTTACTCCCTAATTACTTCAAACACAACAATTTCTCCAGCTTCGTACGTCAACTCAATACTTATGGTTTCAGAAAAATCGTACCGGATCGATGGGAGTTCGCTAATGAGTTTTTCAAGAGAGGCGAAAAGCATTTATTATGCGAAATCCATCGGAGAAAAACAGCTCAGCCAGTACAAAGTATGTCAGTGAATCATCCCCATTCATATCATACG…	MALMLDNCEGILLSLDSHKSVPAPFLTKTYQLVDDPSTDHIVSWGEDDSTFVVWRPPEFARDLLPNYFKHNNFSSFVRQLNTYGFRKIVPDRWEFANEFFKRGEKHLLCEIHRRKTAQPVQSMSVNHPHSYHTGSGFFPNYPSNYNPRLSVSPPDSDDQLYQQQNINWCDSPCSNNNNASNNNTNTVTALSEDNDRLRRSNNMLMSELAHMRKLYNDIIYFVQNHVKPVTPSSSYNTCSLLPASATPIVQKNMNIHHHQFGYQQITNPKNIVISNINTNNIVSPSKTSQSSSVTILDEGNGGDNTSTKLFGVPLMSKKRVHPEYSSSYYSTTNMVEKNKARLMVLEKNDLGLNLMPPSSS	FLTKTYQLVDDPSTDHIVSWGEDDSTFVVWRPPEFARDLLPNYFKHNNFSSFVRQLNTYGFRKIVPDRWEFANEFFKRGEKHLLCEIHRRKTA	PFLTKTYQLVDDPSTDHIVSWGEDDSTFVVWRPPEFARDLLPNYFKHNNFSSFVRQLNTYGFRKIVPDRWEFANEFFKRGEKHLLCEIHRRKTAQ
SlyHSF-08	Solyc06g072750.2	TGAGTAATTCACTCTGCACTCTGCTACTTTCTATTTTATCACTCTTTTTTTCCCAAACCAATCTTCTCTCTCACCATCTCCTCGAATCGCGAGACCTACAAACCATTTTCTACTGCTTCTTCGTATCTCACTCTCTGTGTATACCAGGTGAATAAACCGTTAGAATGTCGCCGGACGGCGAAAAAACTAAAGGAGGAGTTCATGAGATAGGAAATTCGGTTCCGCCTTTTCTGAGCAAAACGTATGACATGGTGGATGATCGGTCGACGGACGCTGTTGTGTCGTGGAGTAAGAGTAATAACAGTTTCGTGGTATGGAATGTGCCGGAGTTCTCAAGGGATGTTTTGCCAAAGTATTTTAAGCACAATAACTTTTCCAGCTTCGTCAGGCAGTTGAATA…	TGAGTAATTCACTCTGCACTCTGCTACTTTCTATTTTATCACTCTTTTTTTCCCAAACCAATCTTCTCTCTCACCATCTCCTCGAATCGCGAGACCTACAAACCATTTTCTACTGCTTCTTCGTATCTCACTCTCTGTGTATACCAGGTGAATAAACCGTTAGAATGTCGCCGGACGGCGAAAAAACTAAAGGAGGAGTTCATGAGATAGGAAATTCGGTTCCGCCTTTTCTGAGCAAAACGTATGACATGGTGGATGATCGGTCGACGGACGCTGTTGTGTCGTGGAGTAAGAGTAATAACAGTTTCGTGGTATGGAATGTGCCGGAGTTCTCAAGGGATGTTTTGCCAAAGTATTTTAAGCACAATAACTTTTCCAGCTTCGTCAGGCAGTTGAATA…	ATGTCGCCGGACGGCGAAAAAACTAAAGGAGGAGTTCATGAGATAGGAAATTCGGTTCCGCCTTTTCTGAGCAAAACGTATGACATGGTGGATGATCGGTCGACGGACGCTGTTGTGTCGTGGAGTAAGAGTAATAACAGTTTCGTGGTATGGAATGTGCCGGAGTTCTCAAGGGATGTTTTGCCAAAGTATTTTAAGCACAATAACTTTTCCAGCTTCGTCAGGCAGTTGAATATTTATGGTTACAAGAAGGTTGATCCAGACTGCTGGGAATTTGCAAATGAGGGATTTCTTAGAGGCCAGAAGCACCTCTTGAAGACTATAAGTAGGCGAAAACCCTCTCAAATGCAGGTTCATCAGGAGACTGCCTCCCAAGTGCAAAGTTTATCTGTTGGATCT…	MSPDGEKTKGGVHEIGNSVPPFLSKTYDMVDDRSTDAVVSWSKSNNSFVVWNVPEFSRDVLPKYFKHNNFSSFVRQLNIYGYKKVDPDCWEFANEGFLRGQKHLLKTISRRKPSQMQVHQETASQVQSLSVGSCVEVGKIGIEEEVERLKIDKSIHMEELVSLRQQQKATDHRLENVGQRLQLMEQREQQAMTFLAKALQSPGFIAELVHQQNEGKRRIPGMNKKRRFPNQEEENYAAKQVSTLRDRQIVRYQPLMNEAAKALLQKLLKTNTSGRLETIVKNTHGFLTNRARSFENTLETGGISPHISEVTLSQLATSSQSHLMSDSGFPFNSSLSVIPEIQYSPSLVPGQAKVPQFPELNALYSKTDNVNPEFSGHGFNTPETHEITNLKRPETGDMP…	FLSKTYDMVDDRSTDAVVSWSKSNNSFVVWNVPEFSRDVLPKYFKHNNFSSFVRQLNIYGYKKVDPDCWEFANEGFLRGQKHLLKTISRRKPS	PFLSKTYDMVDDRSTDAVVSWSKSNNSFVVWNVPEFSRDVLPKYFKHNNFSSFVRQLNIYGYKKVDPDCWEFANEGFLRGQKHLLKTISRRKPSQ
SlyHSF-09	Solyc12g098520.1	ATTTAGGAACATATTTGACCTTATTCCCTTATTTTTTTAAATCCTAAAATCTCTCTCATCCCCTAAATTTCAACACCAATAAAAAATTCCATACAACAAATTCCCTAGTTGTTCTCACATAGTTTTAAATCCTCTCAAACACACACAAACTTTTCTCAGATCTCAAAAAAAAAAAAAATTGCATTTTCATAAAAAAGAAAAGAGATCCCAAAATATTGAATCCATTATGGCTCGTGAGGAGAATGTGTACATGGCGAAGCTTGCTGAGCAAGCTGAAAGATACGAAGAAATGGTGCAGTTCATGGAGAAAGTTTCAACTTCATTAGGCTCAGAGGAACTTACTGTTGAGGAACGGAATCTTCTTTCCGTTGCTTACAAAAACGTTATCGGGGCTCGTAG…	ATGGATGTGATTTCAGCGGCGGTGGCGGCCGGCGGCGGTGGAGGTCCGGCGCCGTTCTTGTCGAAGACATATGAGATGGTGGATGATTCGCAAACTGATGACATCGTATCATGGACTCCGACTGGTCACAGCTTCGTCGTTTGGAATCCTCCAGAATTCGCTCGAATTCTTCTTCCTACTTATTTCAAACACAACAATTTCTCCAGTTTCATTCGACAGCTCAATACTTACGGCTTCCGGAAGATTGATCCAGAAAGATGGGAATTTGCCAATGAGGAATTCTTGAAGGACCAGAAGCATCTACTTAAGAACATCCATCGTAGAAAACCCATTCACAGTCATAGTCACCCTCCAGGTTCCACAGTTGATCCAGAAAGAGCTGCATTTGAGGAAGAGATT…	ATGGATGTGATTTCAGCGGCGGTGGCGGCCGGCGGCGGTGGAGGTCCGGCGCCGTTCTTGTCGAAGACATATGAGATGGTGGATGATTCGCAAACTGATGACATCGTATCATGGACTCCGACTGGTCACAGCTTCGTCGTTTGGAATCCTCCAGAATTCGCTCGAATTCTTCTTCCTACTTATTTCAAACACAACAATTTCTCCAGTTTCATTCGACAGCTCAATACTTACGGCTTCCGGAAGATTGATCCAGAAAGATGGGAATTTGCCAATGAGGAATTCTTGAAGGACCAGAAGCATCTACTTAAGAACATCCATCGTAGAAAACCCATTCACAGTCATAGTCACCCTCCAGGTTCCACAGTTGATCCAGAAAGAGCTGCATTTGAGGAAGAGATT…	MDVISAAVAAGGGGGPAPFLSKTYEMVDDSQTDDIVSWTPTGHSFVVWNPPEFARILLPTYFKHNNFSSFIRQLNTYGFRKIDPERWEFANEEFLKDQKHLLKNIHRRKPIHSHSHPPGSTVDPERAAFEEEIDKLTREKSGLEANVSRFRQQQSAAKLQLEELTGRVGSIEQRQESLLIFVEKAIQNPDFVERLAQKLESMDISAFSKKRRLPQIDSTQPVQESMSVDNHSSSRVEFGNLSHQDFSNKLRLELSPAVSDINVLSCSTQSSNEDGGSPAHRRISEGWSREVQLRTVGAIYTPEAIELSDTGTSFMLKMDSSLPHASSNAESSRLHSLPQSLTSNEEVDGHISCQLNLSLASCLSQVDKNQYSARMPQIGQEIGKCFESQSDANDKIPPT…	FLSKTYEMVDDSQTDDIVSWTPTGHSFVVWNPPEFARILLPTYFKHNNFSSFIRQLNTYGFRKIDPERWEFANEEFLKDQKHLLKNIHRRK	PFLSKTYEMVDDSQTDDIVSWTPTGHSFVVWNPPEFARILLPTYFKHNNFSSFIRQLNTYGFRKIDPERWEFANEEFLKDQKHLLKNIHRRKPIH
SlyHSF-10	Solyc08g080540.2	CATCTTTATTTTTTCCTTTATTAGCCATTTGCTCCTTCTCTCCTCCTATCCTACTCACCTCCTAAGAAACTTCTAGAACAAAAACGCAAATTTCTCATTTTTCTCGTCTTCTCGATCTGTTTAGAGGGGGTTTGGATCTGAATTGACGGCAACGGTGGATGCTATGGTGCCATCGTCGGTTGATTGTACCGGCGAATCTGCCACCGGGGAGAATCAGAGATCTCTTCCGACGCCATTTTTGACGAAAACTTATCAGCTTGTCGATGATCCTGCTATGGATGAGTTGATCTCGTGGAATGAAGATGGAACGACATTTATTGTTTGGAAACCTGCGGAGTTTGCTAGGGATTTGCTTCCCAAATGTTTTAAGCATAATAATTTTTCCAGTTTTGTTCGGCA…	CATCTTTATTTTTTCCTTTATTAGCCATTTGCTCCTTCTCTCCTCCTATCCTACTCACCTCCTAAGAAACTTCTAGAACAAAAACGCAAATTTCTCATTTTTCTCGTCTTCTCGATCTGTTTAGAGGGGGTTTGGATCTGAATTGACGGCAACGGTGGATGCTATGGTGCCATCGTCGGTTGATTGTACCGGCGAATCTGCCACCGGGGAGAATCAGAGATCTCTTCCGACGCCATTTTTGACGAAAACTTATCAGCTTGTCGATGATCCTGCTATGGATGAGTTGATCTCGTGGAATGAAGATGGAACGACATTTATTGTTTGGAAACCTGCGGAGTTTGCTAGGGATTTGCTTCCCAAATGTTTTAAGCATAATAATTTTTCCAGTTTTGTTCGGCA…	ATGGTGCCATCGTCGGTTGATTGTACCGGCGAATCTGCCACCGGGGAGAATCAGAGATCTCTTCCGACGCCATTTTTGACGAAAACTTATCAGCTTGTCGATGATCCTGCTATGGATGAGTTGATCTCGTGGAATGAAGATGGAACGACATTTATTGTTTGGAAACCTGCGGAGTTTGCTAGGGATTTGCTTCCCAAATGTTTTAAGCATAATAATTTTTCCAGTTTTGTTCGGCAGCTTAATACTTACGGATTTAGAAAAGTTGTACCTGATCGATGGGAATTCGCAAATGACTGTTTCCGTAGAGGTGAGAAAGGACTACTTCGTGACATTCAACGCCGGAAAATTTCACCGGCAGGTGCTGCGGTTGTTGCACCAGCAGTAGTAACGGTGAATGCT…	MVPSSVDCTGESATGENQRSLPTPFLTKTYQLVDDPAMDELISWNEDGTTFIVWKPAEFARDLLPKCFKHNNFSSFVRQLNTYGFRKVVPDRWEFANDCFRRGEKGLLRDIQRRKISPAGAAVVAPAVVTVNAAQAVTVAVAPAVRVVSSSNSGDEQAFSSNSSGAAAGAAMLRTTTCTTTPELIEENERLRKENAQLNQELNRLRSLCSNVYNLMSNYTANPADIPAGILGGRALELLRTGQVDGGGAAITAAESSGFKADEDMSPRLFGVSIGVKRVRRSSEEESEDQDQVQPHGSDMKSEPLDSGSAQHDDQPWIDRLDLGC	FLTKTYQLVDDPAMDELISWNEDGTTFIVWKPAEFARDLLPKCFKHNNFSSFVRQLNTYGFRKVVPDRWEFANDCFRRGEKGLLRDIQRRKI	PFLTKTYQLVDDPAMDELISWNEDGTTFIVWKPAEFARDLLPKCFKHNNFSSFVRQLNTYGFRKVVPDRWEFANDCFRRGEKGLLRDIQRRKISP
SlyHSF-11	Solyc04g016000.2	GTTATCTTTGCATTTCTCATGAACTTCGGTGTCGTGTTAGGTTTCTATTGTTGGGGTTGGGAGTTCTTAACTGCCCTTCTTCTTTTCTCCACTCTTTCTTCTATCTAACTAAATAATTTCAATAATTTCTACAAAAAAAAATAATCAAAAATCCCAAAAAGGGTTGATCATTTTGTGTTTCTCTACTCATTTCACCAATTTTCTTGAAAAAAAAATTACAAAAAAAGTTCATTTTTTGTGTGTTTAATTTCTTGTTTTTACCAATTTTCTAGGTTTTCAAAAACTCCAACAACAAAACAAACCAAAAGGGGTTGCTTATTTAGTGTTTCTCTACTCATTTTACCAATTTTTCTTGAAAAAAAAATCTTTCTTTTTTTGTTATGGGGGTATTAGAAGGAG…	GTTATCTTTGCATTTCTCATGAACTTCGGTGTCGTGTTAGGTTTCTATTGTTGGGGTTGGGAGTTCTTAACTGCCCTTCTTCTTTTCTCCACTCTTTCTTCTATCTAACTAAATAATTTCAATAATTTCTACAAAAAAAAATAATCAAAAATCCCAAAAAGGGTTGATCATTTTGTGTTTCTCTACTCATTTCACCAATTTTCTTGAAAAAAAAATTACAAAAAAAGTTCATTTTTTGTGTGTTTAATTTCTTGTTTTTACCAATTTTCTAGGTTTTCAAAAACTCCAACAACAAAACAAACCAAAAGGGGTTGCTTATTTAGTGTTTCTCTACTCATTTTACCAATTTTTCTTGAAAAAAAAATCTTTCTTTTTTTGTTATGGGGGTATTAGAAGGAG…	ATGGGGGTATTAGAAGGAGGTCAAGTAAGTGATGAAAAGAGTTTGTTAGAGTATGTTGTGATGAAAAAGTCATCACCATCACCATTTTTATTGAAAACCTACATGTTGGTGGAAGATCCGGCGACAGACGACCTCGTTTCTTGGAATTCCGATGGATCGGCGTTTGTTGTATGGCAGCCGGCGGAATTTGCAAGGGATTTGTTACCTACACTCTTCAAACATAGCAACTTTTCAAGCTTTGTTCGACAACTTAATACCTATGGTTTTCGTAAAATTACAACAAGTCAATGGGAGTTCAGTAATGATAAGTTTAAAAAGGGCGAAAAGAATTTACTCCGTGAAATTCGCCGAAGAAAAGCATGGACAAATAGGCAACAACCAAACAACAAGAAAGACAAT…	MGVLEGGQVSDEKSLLEYVVMKKSSPSPFLLKTYMLVEDPATDDLVSWNSDGSAFVVWQPAEFARDLLPTLFKHSNFSSFVRQLNTYGFRKITTSQWEFSNDKFKKGEKNLLREIRRRKAWTNRQQPNNKKDNIIEEDQRSSSSTSSSSEYINLVDENKRLKMENGVLSSELLLMKNKCKELMNIVTIFAKNPEKEEDEKKPMLFGVRLEVKEEMEKKRKRVELNEMASVFLSQLCK	FLLKTYMLVEDPATDDLVSWNSDGSAFVVWQPAEFARDLLPTLFKHSNFSSFVRQLNTYGFRKITTSQWEFSNDKFKKGEKNLLREIRRRKA	PFLLKTYMLVEDPATDDLVSWNSDGSAFVVWQPAEFARDLLPTLFKHSNFSSFVRQLNTYGFRKITTSQWEFSNDKFKKGEKNLLREIRRRKAWT
SlyHSF-12	Solyc12g007070.1	CGTAATGTTATAAACTCGTAAAGAAAAATATTTTGTTCCTTCAACTAAAAACTAGTGAGATTTAGGTAAGTTTTGGTTAATTCATTATAAACTACATAATTAATCCAAAGCCAATCACAGTGGTGAAGAAAGTTCAACAGGTGAGATTTAGCTTTACTCTGTATTTCTTCAGCCCCAAAAATGGCTGCTTCACTTCCTAGAGCAGCCTTCTCTTTACTCTCTTTGCTTAATTCAACCATTAATAAACCTTCCTTATCACCATTTTCATCTCCAAAACCTTCTTTCTTCACTATCAAACCTAAGGTCCAATACCCATACCATATCTTGATTCCAAACAGAACAAAAAAATTGGTTCAATTTTTTGTAAAAGATTATAATTTTTCTGATACCCATTTATGT…	ATGGAGGCTAACAATATTATTGCTCCGTTCGTGATGAAAACTTATCAAATGGTGAATGATCCGAAGATTGATGGACTTATAGCCTGGGGAACAGCTAATAACAGTTTCATAGTTGTTGAACCTTTGGATTTTTCTCAACGAATTTTGCCTGTTTACTTTAAGCACAACAATTTCTCCAGCTTTGTTCGTCAGCTCAATACTTATGGATTCAGAAAAGTGGATCCAGATAAGTGGGAATTTGCAAATGAATGGTTTCTGAGAGGGCAAACGCATTTGTTGAAGAACATAGTGAGGAAAAAGCACAGTAGAAATTCGTGTTCTCAGAAGCAGGATGAGAGTGAAGATGAAGAAATTTTGACTGAAATTTCTAGATTAAAGCAGGAACAAAAAGCATTAGAG…	ATGGAGGCTAACAATATTATTGCTCCGTTCGTGATGAAAACTTATCAAATGGTGAATGATCCGAAGATTGATGGACTTATAGCCTGGGGAACAGCTAATAACAGTTTCATAGTTGTTGAACCTTTGGATTTTTCTCAACGAATTTTGCCTGTTTACTTTAAGCACAACAATTTCTCCAGCTTTGTTCGTCAGCTCAATACTTATGGATTCAGAAAAGTGGATCCAGATAAGTGGGAATTTGCAAATGAATGGTTTCTGAGAGGGCAAACGCATTTGTTGAAGAACATAGTGAGGAAAAAGCACAGTAGAAATTCGTGTTCTCAGAAGCAGGATGAGAGTGAAGATGAAGAAATTTTGACTGAAATTTCTAGATTAAAGCAGGAACAAAAAGCATTAGAG…	MEANNIIAPFVMKTYQMVNDPKIDGLIAWGTANNSFIVVEPLDFSQRILPVYFKHNNFSSFVRQLNTYGFRKVDPDKWEFANEWFLRGQTHLLKNIVRKKHSRNSCSQKQDESEDEEILTEISRLKQEQKALEHEVENMTRRLEATEKRPQQMMAFLCKVVDDPEILPRILMEKERSKRLSLTNREKKRRLVISNSTSCSSVKSEDALGATSSFHSPDANFDKDAICQSSPSSGTPPPPTAWLGSRPMITYEPGTIQSIRSPDANFDKDTFYQSSPSSETPSTAWMNQQKVIIGGRPMMMINEAYGSCPTMSSTLSTGSSESGGFTAPPMDNFYGYDYGGGGRGGGGGTPATEEASTPPYPFSLFGGGF	FVMKTYQMVNDPKIDGLIAWGTANNSFIVVEPLDFSQRILPVYFKHNNFSSFVRQLNTYGFRKVDPDKWEFANEWFLRGQTHLLKNIVRKKHS	PFVMKTYQMVNDPKIDGLIAWGTANNSFIVVEPLDFSQRILPVYFKHNNFSSFVRQLNTYGFRKVDPDKWEFANEWFLRGQTHLLKNIVRKKHSR
SlyHSF-13	Solyc09g082670.2	TATATTCATCAAACTATGACCTAACATCTCTCTCTTCTCTCTCACTCTTGACCTCCATTAATACAACATATTAATATTCCATCTCCTTCTCATCCAAATCTAATTTTACAAACTCTTTTTACCTCTCCTATATCCTCCATTTTCTTGGAAAATTATTTCTTTTTCTCATTTTCATCTAAATCTTGATTCTCCTCACTCCCAAACCCTAAAAATCCCAAAGATGTTGTAACTAGCTAGCAACACCCTCTTTGAACTTCAAAACATATTAATTAAACATATTTTCCTTTATTCAAGATTTAACTTTCTAGTACACCCCTTGTTAGATCAAGATTTATATGGATCCTAATTTTGGTGTCCCAATAAAAGAAGAGTTCCCTAGATCTAATGAACCTACTATGT…	TATATTCATCAAACTATGACCTAACATCTCTCTCTTCTCTCTCACTCTTGACCTCCATTAATACAACATATTAATATTCCATCTCCTTCTCATCCAAATCTAATTTTACAAACTCTTTTTACCTCTCCTATATCCTCCATTTTCTTGGAAAATTATTTCTTTTTCTCATTTTCATCTAAATCTTGATTCTCCTCACTCCCAAACCCTAAAAATCCCAAAGATGTTGTAACTAGCTAGCAACACCCTCTTTGAACTTCAAAACATATTAATTAAACATATTTTCCTTTATTCAAGATTTAACTTTCTAGTACACCCCTTGTTAGATCAAGATTTATATGGATCCTAATTTTGGTGTCCCAATAAAAGAAGAGTTCCCTAGATCTAATGAACCTACTATGT…	ATGGATCCTAATTTTGGTGTCCCAATAAAAGAAGAGTTCCCTAGATCTAATGAACCTACTATGTGGATTCCTCAACCAATGGAGGGGCTTCATGAGAATGGACCTCCACCATTTCTAACAAAGACTTATGAATTTGTGGATGATCAAAACACCAATAATGTTGTTTCTTGGAGTATAGGTAATAATAGTTTCATTGTTTGGGATCCTCAAACTTTTGCCATGAATCTACTTCCAAGGTACTTCAAGCATAGCAATTTCTCAAGCTTTGTCAGACAGCTCAATACTTATGGATTTAGGAAGGTTAATCCAGACCATTGGGAGTTTGCTCATGAAGGTTTCTTGAGAGGGCAAAGGCATCTCTTGAAAACAATTAGGAGGAGAAAAACAAGTAATTTCCAT…	MDPNFGVPIKEEFPRSNEPTMWIPQPMEGLHENGPPPFLTKTYEFVDDQNTNNVVSWSIGNNSFIVWDPQTFAMNLLPRYFKHSNFSSFVRQLNTYGFRKVNPDHWEFAHEGFLRGQRHLLKTIRRRKTSNFHPGQGSNQGIDSYIELGKLEIDGEIDRLRREKKDLMMELVELKQHQQTTKSHIKSMEEKLKRTEAKQQQMMNFLAKAMQNPRFLEQMMQQKERRKELEEEIRNKRRRQIDHHQGPSNIVGELDHSFNNSDGNFNIKMEPHEYYYGEMNGFDNLELETSLGMSMQGGPSENTINFEDKSIDHEGFWEGLLNESIEDEINLLEGENEEDHVDVLAHQLGFLGSTPN	FLTKTYEFVDDQNTNNVVSWSIGNNSFIVWDPQTFAMNLLPRYFKHSNFSSFVRQLNTYGFRKVNPDHWEFAHEGFLRGQRHLLKTIRRRKTS	PFLTKTYEFVDDQNTNNVVSWSIGNNSFIVWDPQTFAMNLLPRYFKHSNFSSFVRQLNTYGFRKVNPDHWEFAHEGFLRGQRHLLKTIRRRKTSN
SlyHSF-14	Solyc06g053960.2	AGTTCTCATTACTCTCTTGCTAATATACCTCCAATATTGCAAACATATTAATTTGTCCTAATTCTTTCTCCCTCTTACCCATACTCCAAATTAATATTAACCCTATCTTTTCTCATATATCCACAAACTCCTTTATTACCTTTGCCAAGATCCTCTATCTTCTTAACTTTGACATTGACTCAAAAATATTGTTATACTCATCTTTGTTGAAGAATCAAAGCATGGATCATTTTGGTAATTTAATAAAAGAAGAGTTTGATGGATCATTTTTGACGCCTCAACCGAAGGAGTGTCTTCATGAGAATGGACCTCCACCATTTCTTACAAAAACATATGAACTTGTGGATGATCCAAGTAACAACGACGTCGTTTCTTGGAGTAGAGGTTACAATAGTTTCA…	AGTTCTCATTACTCTCTTGCTAATATACCTCCAATATTGCAAACATATTAATTTGTCCTAATTCTTTCTCCCTCTTACCCATACTCCAAATTAATATTAACCCTATCTTTTCTCATATATCCACAAACTCCTTTATTACCTTTGCCAAGATCCTCTATCTTCTTAACTTTGACATTGACTCAAAAATATTGTTATACTCATCTTTGTTGAAGAATCAAAGCATGGATCATTTTGGTAATTTAATAAAAGAAGAGTTTGATGGATCATTTTTGACGCCTCAACCGAAGGAGTGTCTTCATGAGAATGGACCTCCACCATTTCTTACAAAAACATATGAACTTGTGGATGATCCAAGTAACAACGACGTCGTTTCTTGGAGTAGAGGTTACAATAGTTTCA…	ATGGATCATTTTGGTAATTTAATAAAAGAAGAGTTTGATGGATCATTTTTGACGCCTCAACCGAAGGAGTGTCTTCATGAGAATGGACCTCCACCATTTCTTACAAAAACATATGAACTTGTGGATGATCCAAGTAACAACGACGTCGTTTCTTGGAGTAGAGGTTACAATAGTTTCATAGTATGGGATCCCCAGAATTTGGCCATTAATTTTCTACCAAGGTATTTCAAGCATAACAATTTCTCAAGCTTTGTCAGGCAGCTCAATACTTATGGATTTAGGAAAGTAAATCCAGACCATTGGGAATTTGCTAATGAAGGTTTTCTGAGAGGGAAAAAGCATCTCTTGAGAACAATAAGGAGAAGAAAACCAAGTAATTTCATCAAGTCTTCGTCATCA…	MDHFGNLIKEEFDGSFLTPQPKECLHENGPPPFLTKTYELVDDPSNNDVVSWSRGYNSFIVWDPQNLAINFLPRYFKHNNFSSFVRQLNTYGFRKVNPDHWEFANEGFLRGKKHLLRTIRRRKPSNFIKSSSSINNQASKGY	FLTKTYELVDDPSNNDVVSWSRGYNSFIVWDPQNLAINFLPRYFKHNNFSSFVRQLNTYGFRKVNPDHWEFANEGFLRGKKHLLRTIRRRKPS	PFLTKTYELVDDPSNNDVVSWSRGYNSFIVWDPQNLAINFLPRYFKHNNFSSFVRQLNTYGFRKVNPDHWEFANEGFLRGKKHLLRTIRRRKPSN
SlyHSF-15	Solyc08g076590.2	CGTACAAACTACTTTCTCTCTCCACTTTAATACCCAATCGTCTTTCTCTCTCTAAAACTTAGTTTTTCTTCTTCCAATTTTCCGTCCTAATCCCCAAAACCCTGTGTATTTGTGAATTTATATATGATCAGCGTTGTGTTAAGTAATTGAAAATTTAATTTCTTCGTTTAGGAATAGGTTCTAATTCAATGGACGCCGGAGGAGGTTCTCCGGTGCCGGAAATAACACCGGCGCCGATGCCTAGCTCAAATGCGGTACCACCTTTTTTGATGAAGACTTATGATATGGTTGATGACCCGAGTACTGACAAGATTGTTTCGTGGAGTCCTACCGATAGTAGCTTTGTGATTTGGGATCCACCGGAGTTCGCCAAGCAGTTACTGCCCAAGTATTTTAAGC…	CGTACAAACTACTTTCTCTCTCCACTTTAATACCCAATCGTCTTTCTCTCTCTAAAACTTAGTTTTTCTTCTTCCAATTTTCCGTCCTAATCCCCAAAACCCTGTGTATTTGTGAATTTATATATGATCAGCGTTGTGTTAAGTAATTGAAAATTTAATTTCTTCGTTTAGGAATAGGTTCTAATTCAATGGACGCCGGAGGAGGTTCTCCGGTGCCGGAAATAACACCGGCGCCGATGCCTAGCTCAAATGCGGTACCACCTTTTTTGATGAAGACTTATGATATGGTTGATGACCCGAGTACTGACAAGATTGTTTCGTGGAGTCCTACCGATAGTAGCTTTGTGATTTGGGATCCACCGGAGTTCGCCAAGCAGTTACTGCCCAAGTATTTTAAGC…	ATGGACGCCGGAGGAGGTTCTCCGGTGCCGGAAATAACACCGGCGCCGATGCCTAGCTCAAATGCGGTACCACCTTTTTTGATGAAGACTTATGATATGGTTGATGACCCGAGTACTGACAAGATTGTTTCGTGGAGTCCTACCGATAGTAGCTTTGTGATTTGGGATCCACCGGAGTTCGCCAAGCAGTTACTGCCCAAGTATTTTAAGCATAGTAACTTCTCCAGCTTCGTTCGTCAGTTGAACACTTATGGCTTTAGAAAGGTTGGTTCCGACCTCTGGAAATTTTCTAATGATGGATTCATAAGAGGTCAAAAGCATCTGCTTAAAAATATTAGCAGGCGCAAGCCTGCTCATGGACAGCAGCAGCAGCAGCAGCTGCATAGTCAGAGTGCGTCA…	MDAGGGSPVPEITPAPMPSSNAVPPFLMKTYDMVDDPSTDKIVSWSPTDSSFVIWDPPEFAKQLLPKYFKHSNFSSFVRQLNTYGFRKVGSDLWKFSNDGFIRGQKHLLKNISRRKPAHGQQQQQQLHSQSASVGACVEVGNFGLEKEVEWLKRDKNVLMQELVKLRQHQQTTDNQMQNMVQNLQIMEQRQQQMMSFLAKAVNSPGFFAQFVQQQNDNNKRKMEGKKKRRIRQDFPSDDHSVRPADGQLVKYHPIMNETAKGMLTQITKLDSSPRLENFSNSPESPPIGDAFDGRSNSRISGVTLQEVSPAFSQPFASTTSAIAGQSSLSANIQFSESSSPIGAQNLPPIVPFSSDMIMPMPSQLQEIVPENNMDINGTERGNDSFMDPTLWGNGELPL…	FLMKTYDMVDDPSTDKIVSWSPTDSSFVIWDPPEFAKQLLPKYFKHSNFSSFVRQLNTYGFRKVGSDLWKFSNDGFIRGQKHLLKNISRRKP	PFLMKTYDMVDDPSTDKIVSWSPTDSSFVIWDPPEFAKQLLPKYFKHSNFSSFVRQLNTYGFRKVGSDLWKFSNDGFIRGQKHLLKNISRRKPAH
SlyHSF-16	Solyc09g059520.2	TGTGACCAATAGCCGGCTGCTGTGTGCAGTCCCACACGAATAGTAATAGGAAGTTAAAGCCATTTTGGTTCAAATTCGTCTCTCTTTCCTTACATCTTCCCCTTTACTTCTTTAGCCGTACAAGGGTTTATTCGGAAGCTGTGTATCATTCATTTGTACAAGTAGATTGCGGAAAGGATAATTGAGTTGAATTCTGTTGGGAATTATGGTGAAATCGTTTGAGAATGGGGTATCTGTTGCACCATTCTTGTTGAAGTGTTATGAAATGGTGGAGGATGAGTCAACTGACGGCTTGATTTCTTGGAATCAATCTGAGAAAAGTTTCATCATATGGGATGTTCCTAAATTTTCATCTGAATTGCTTCCTAAGTACTTCAAGCATAGCAACTTCTCCAGCTT…	TGTGACCAATAGCCGGCTGCTGTGTGCAGTCCCACACGAATAGTAATAGGAAGTTAAAGCCATTTTGGTTCAAATTCGTCTCTCTTTCCTTACATCTTCCCCTTTACTTCTTTAGCCGTACAAGGGTTTATTCGGAAGCTGTGTATCATTCATTTGTACAAGTAGATTGCGGAAAGGATAATTGAGTTGAATTCTGTTGGGAATTATGGTGAAATCGTTTGAGAATGGGGTATCTGTTGCACCATTCTTGTTGAAGTGTTATGAAATGGTGGAGGATGAGTCAACTGACGGCTTGATTTCTTGGAATCAATCTGAGAAAAGTTTCATCATATGGGATGTTCCTAAATTTTCATCTGAATTGCTTCCTAAGTACTTCAAGCATAGCAACTTCTCCAGCTT…	ATGGTGAAATCGTTTGAGAATGGGGTATCTGTTGCACCATTCTTGTTGAAGTGTTATGAAATGGTGGAGGATGAGTCAACTGACGGCTTGATTTCTTGGAATCAATCTGAGAAAAGTTTCATCATATGGGATGTTCCTAAATTTTCATCTGAATTGCTTCCTAAGTACTTCAAGCATAGCAACTTCTCCAGCTTCATTCGTCAACTCAACATCTATGGTTTTCATAAAACTGATACAGATAGATGGGAATTTTTGAATGATAGCTTTGTCAAAGGCCAAAAGCATTTTTTAAAGAATATTGTTAGAAGGAAACAGTCCAGTGTAGCCCAAAAGAAACCATCCCAACTTGAGGAGATCAAGTCTTGTACATCTGAAGAAAGTAAGAATCTTGAACTGTGG…	MVKSFENGVSVAPFLLKCYEMVEDESTDGLISWNQSEKSFIIWDVPKFSSELLPKYFKHSNFSSFIRQLNIYGFHKTDTDRWEFLNDSFVKGQKHFLKNIVRRKQSSVAQKKPSQLEEIKSCTSEESKNLELWKEVENLKDERNVLTQELVKLKEHQQNSESKLILLREQLKVREKNQQQMLSFIVMAMQSPSFLVQFFQPKENSWCMSENGNNILSEVEDDCVDTPSDRAIVRYHPPTHEEAAETLLCAEPEPALDSQKPMELDFSSNELKDMFSNIDFFSGLMDEKLLAFENRVPLTLPYHPDDDNLLEQLLLSSPITENNEGEVMDNPACSHTGMETDLESGTFSGSEEPFHSLEDKKMEMDLLETQSDNLSNMDILAEQLGHSKF	FLLKCYEMVEDESTDGLISWNQSEKSFIIWDVPKFSSELLPKYFKHSNFSSFIRQLNIYGFHKTDTDRWEFLNDSFVKGQKHFLKNIVRRKQS	PFLLKCYEMVEDESTDGLISWNQSEKSFIIWDVPKFSSELLPKYFKHSNFSSFIRQLNIYGFHKTDTDRWEFLNDSFVKGQKHFLKNIVRRKQSS
SlyHSF-17	Solyc02g072000.2	ATAGGAAGAAAGATATTCGGGAATGTTGAATTTGTATCACCTGGAAACTTAGATTTATATATAAGATAAGAATAAGAATCTGTTTTCACATTTGAGCAAGTAGTCTCTAGTGTGGGGTTCTGGAAACAAGCATGTAGTCTGTGATCAGGTGAGATTTGCTTGAATTTGATTGTAACGCAGCGAGATCTAGCTCATTACGATCCTTACGAGGAGTTTTCTGGAGTGTGATGATAAGAAGTTTTGCTCTTAGTAGATGTTCTGTTTCGTTGTTTTAGTTTAGGGGTTGTGATTTTCGTTGAAACCTATCATGGATGAAGCTTCGTGCAGCACGAATGCACTGCCTCCTTTTATTGCAAAGACATATGAAATGGTGGATGATCCATCCTGTGATGCTATTGT…	ATAGGAAGAAAGATATTCGGGAATGTTGAATTTGTATCACCTGGAAACTTAGATTTATATATAAGATAAGAATAAGAATCTGTTTTCACATTTGAGCAAGTAGTCTCTAGTGTGGGGTTCTGGAAACAAGCATGTAGTCTGTGATCAGGTGAGATTTGCTTGAATTTGATTGTAACGCAGCGAGATCTAGCTCATTACGATCCTTACGAGGAGTTTTCTGGAGTGTGATGATAAGAAGTTTTGCTCTTAGTAGATGTTCTGTTTCGTTGTTTTAGTTTAGGGGTTGTGATTTTCGTTGAAACCTATCATGGATGAAGCTTCGTGCAGCACGAATGCACTGCCTCCTTTTATTGCAAAGACATATGAAATGGTGGATGATCCATCCTGTGATGCTATTGT…	ATGGATGAAGCTTCGTGCAGCACGAATGCACTGCCTCCTTTTATTGCAAAGACATATGAAATGGTGGATGATCCATCCTGTGATGCTATTGTCTCCTGGAGTTCGAATAATAAAAGCTTCATTGTGTGGAATCCTCCAGATTTTGCAAGAGATTTGTTGCCTAGATACTTCAAGCACAATAATTTTTCCAGCTTTATCAGACAACTAAACACTTATGGATTCAGGAAAATTGACCCTGAAAAATGGGAGTTCGCGAATGAAGGTAATTTCATTAGAGGTCAGCCGAACCTTTTGAAGAATATCCATAGGCGTAAACCTGTTCATAGTCATTCTGCACAGAATCTTCATGGCCTGTCATCTCCATTAACTGAATCAGAAAGACAGGGATACAAGGAAGAT…	MDEASCSTNALPPFIAKTYEMVDDPSCDAIVSWSSNNKSFIVWNPPDFARDLLPRYFKHNNFSSFIRQLNTYGFRKIDPEKWEFANEGNFIRGQPNLLKNIHRRKPVHSHSAQNLHGLSSPLTESERQGYKEDIQKLMHENGSLHLDLQRHKQDHQGLELQMQVLTERVQHAEHRQKTMISALAQTLDRPVMDLSHMPQLQVNDRKRRFPGNSCLYNESDLEDMRGISSRALSRENMNPSSLLTMNAELLDQLESSLTFWEDVLQDVDQAGMRPNCLLQLDESTSCADSPAISYTQLNIDVGPKASGIDMNSEPNANIMPEVAEPEDKAAVAGTSTNVPTGVNDLFWEQFLTENPGSVDAPEVQSERKDIGSKKNESKPVDSGKYWWNMKSVNSLAEQM…	FIAKTYEMVDDPSCDAIVSWSSNNKSFIVWNPPDFARDLLPRYFKHNNFSSFIRQLNTYGFRKIDPEKWEFANEGNFIRGQPNLLKNIHRRKP	PFIAKTYEMVDDPSCDAIVSWSSNNKSFIVWNPPDFARDLLPRYFKHNNFSSFIRQLNTYGFRKIDPEKWEFANEGNFIRGQPNLLKNIHRRKPVH
SlyHSF-18	Solyc08g062960.2	ATCCATCTTAATTGTAATTAGCAAAGTAATGGAGGATGTAGTGAAAGTGAAGGTCGAAGAAGATGGCATTCCGACGGCCGTGCTGCCTATGGAAGGGCTGCACGACGTTGGTCCGCCGCCATTTCTGAGCAAAACTTATGAGATGGTGGAAGATTCCTCAACTGATCAAGTCATATCATGGAGCACAACAAGGAATAGCTTTATTGTTTGGGACTCTCATAAGTTTTCCACCACATTGTTGCCTAGGTTTTTCAAGCACAGCAATTTTTCCAGTTTCATTCGGCAGCTTAACACATATGTAAGTATCTTTTTCCTTCTAATTTTATCTAGATTAAGAATATTTTCAATTTTCGATAAGTTAGGGTTTCGAAATAGCGATGTGTTGAACACCGAGGTGAT…	ATCCATCTTAATTGTAATTAGCAAAGTAATGGAGGATGTAGTGAAAGTGAAGGTCGAAGAAGATGGCATTCCGACGGCCGTGCTGCCTATGGAAGGGCTGCACGACGTTGGTCCGCCGCCATTTCTGAGCAAAACTTATGAGATGGTGGAAGATTCCTCAACTGATCAAGTCATATCATGGAGCACAACAAGGAATAGCTTTATTGTTTGGGACTCTCATAAGTTTTCCACCACATTGTTGCCTAGGTTTTTCAAGCACAGCAATTTTTCCAGTTTCATTCGGCAGCTTAACACATATGGATTTAGAAAGGTGGATCCTGACAGATGGGAATTTGCGAATGGAGGTTTTCTGGGAGGGCAAAAGCATCTTTTGAAGACGATAAAGAGGAGGAGGAATGT…	ATGGAGGATGTAGTGAAAGTGAAGGTCGAAGAAGATGGCATTCCGACGGCCGTGCTGCCTATGGAAGGGCTGCACGACGTTGGTCCGCCGCCATTTCTGAGCAAAACTTATGAGATGGTGGAAGATTCCTCAACTGATCAAGTCATATCATGGAGCACAACAAGGAATAGCTTTATTGTTTGGGACTCTCATAAGTTTTCCACCACATTGTTGCCTAGGTTTTTCAAGCACAGCAATTTTTCCAGTTTCATTCGGCAGCTTAACACATATGGATTTAGAAAGGTGGATCCTGACAGATGGGAATTTGCGAATGGAGGTTTTCTGGGAGGGCAAAAGCATCTTTTGAAGACGATAAAGAGGAGGAGGAATGTTGGTCAGAGTATGAATCAACAAGGATCT…	MEDVVKVKVEEDGIPTAVLPMEGLHDVGPPPFLSKTYEMVEDSSTDQVISWSTTRNSFIVWDSHKFSTTLLPRFFKHSNFSSFIRQLNTYGFRKVDPDRWEFANGGFLGGQKHLLKTIKRRRNVGQSMNQQGSGACIEIGYYGMEEELERLKRDKNVLMTEIVKLRQQQQSTRNHIIAMGEKIETQERKQVQMMSFLAKIFSNPTFLQQYLDKHVHRKDKQRIEVGQKRRLTMTPSATGSDQPMNYSSSHQESEAELASIEMLFSAAMDNESSSNVRPDSVVTANGTDMEPVADDIWEELLSEDLISGDRAAEEVVVVEQPEFDVEVEDLVVKTPEWGEELQDLVDQLGFL	FLSKTYEMVEDSSTDQVISWSTTRNSFIVWDSHKFSTTLLPRFFKHSNFSSFIRQLNTYGFRKVDPDRWEFANGGFLGGQKHLLKTIKRRRN	PFLSKTYEMVEDSSTDQVISWSTTRNSFIVWDSHKFSTTLLPRFFKHSNFSSFIRQLNTYGFRKVDPDRWEFANGGFLGGQKHLLKTIKRRRNVG
SlyHSF-19	Solyc10g079380.1	ATGGCAATTGAATCTCCAGACGCTGAATTTGGAGTCAGGTTTCGACCCACTGATGAACAGCTCATTCGCTACTTGATTAAATTTGTTGTTTCTAAAAACTACGTTTGTAAAGATATTGAATTTGAAGAACTTTACGGAAGTAAGAAGCCATGGGAGTTACTGGAAGACTCATCCGGTACTAAATATTTTTTTACTAAATTAAAGAAACGCGATACAAGGTTTAGTCGGACTTTGGTGGGAGGAGGAAGTTGGAAAGGGAAGAGCAAAGGAAAGTCAATAGGTGCGAAGAAAATTGGGATGAAAAAAACTTATAACTATGAAGAAAATAAAAAGGATGTAGTTAACGACGTTTCTTGGATCATGAAAGAGTATAGTCTTGACGACAAGGTAATAAAGTTG…	ATGGGGGAATTAGAGGATGAATGTGAAAGGAATTTGTTAGAGTATGTAAGGAAGGCATCAACACCACCATTCTTGCTAAAAACATACATGTTGGTGGAGGATCCGGCGACGGACGACGTCATTTCTTGGAATTCCGATGGATCGGCGTTTATAGTCCGGCAACCGGCGGAGTTTGCTAGAGATTTGCTTCCAACACTTTTCAAACATAGCAACTTTTCTAGCTTTGTCCGGCAGCTTAATACCTATGGTTTTCGTAAAATTACAACAAATCAGTGGGAATTCAGCAACGATTTATTTCGCAAGGGAGATAAAGATTTACTATGTGATATTCGTCGAAAAAAAGCAAGGACAAACAAACAACAACCTAACAAAAACATCAGGAAAGAAAGTGAAGATGAA…	ATGGGGGAATTAGAGGATGAATGTGAAAGGAATTTGTTAGAGTATGTAAGGAAGGCATCAACACCACCATTCTTGCTAAAAACATACATGTTGGTGGAGGATCCGGCGACGGACGACGTCATTTCTTGGAATTCCGATGGATCGGCGTTTATAGTCCGGCAACCGGCGGAGTTTGCTAGAGATTTGCTTCCAACACTTTTCAAACATAGCAACTTTTCTAGCTTTGTCCGGCAGCTTAATACCTATGGTTTTCGTAAAATTACAACAAATCAGTGGGAATTCAGCAACGATTTATTTCGCAAGGGAGATAAAGATTTACTATGTGATATTCGTCGAAAAAAAGCAAGGACAAACAAACAACAACCTAACAAAAACATCAGGAAAGAAAGTGAAGATGAA…	MGELEDECERNLLEYVRKASTPPFLLKTYMLVEDPATDDVISWNSDGSAFIVRQPAEFARDLLPTLFKHSNFSSFVRQLNTYGFRKITTNQWEFSNDLFRKGDKDLLCDIRRKKARTNKQQPNKNIRKESEDEDQKSSSSTYNSSSSFEYNSLVDENKRLKMENGELSYELSLVNKKCKDLIDLVAILSKKSKEEEKKEGQKGKRPMLFGVRLEVEEEIERKRKRVEFNEIASLFLSQTMQIKIGKEDIYYRTIE	FLLKTYMLVEDPATDDVISWNSDGSAFIVRQPAEFARDLLPTLFKHSNFSSFVRQLNTYGFRKITTNQWEFSNDLFRKGDKDLLCDIRRKKA	PFLLKTYMLVEDPATDDVISWNSDGSAFIVRQPAEFARDLLPTLFKHSNFSSFVRQLNTYGFRKITTNQWEFSNDLFRKGDKDLLCDIRRKKART
SlyHSF-20	Solyc03g006000.2	TCAGGTGGGAGCTGCTTCAATTGAATTTATCGAAGGAAATCAAGGTGATAACACTTTTGGTTGGTTGTATCTGTATGTTGGGAATCTGATAAGTTGATCTTCCCTGTCAGTAAGGATTTGTCACTTGTAGTTGAGCTTCGCCTTGTGAGTTTCATTTCAAGGGGTTGTGATTTGGATTTGAATTTACCATGGATGAAGCTCCTTGCAGCGTCAATGCACTGCCTCCGTTTATTGCAAAGATATATGAAATGGTGGATGATCCCTCCACTGATCCAATAGTCTCATGGAGTTTAAACAATAAAAGTTTTATTGTTCGTAATCCTCCTGATTTTGCAAGAGATTTGTTGCCCAGATACTTTAAGCACAATAATTTTTCCAGCTTTATCCGACAGCTGAATA…	TCAGGTGGGAGCTGCTTCAATTGAATTTATCGAAGGAAATCAAGGTGATAACACTTTTGGTTGGTTGTATCTGTATGTTGGGAATCTGATAAGTTGATCTTCCCTGTCAGTAAGGATTTGTCACTTGTAGTTGAGCTTCGCCTTGTGAGTTTCATTTCAAGGGGTTGTGATTTGGATTTGAATTTACCATGGATGAAGCTCCTTGCAGCGTCAATGCACTGCCTCCGTTTATTGCAAAGATATATGAAATGGTGGATGATCCCTCCACTGATCCAATAGTCTCATGGAGTTTAAACAATAAAAGTTTTATTGTTCGTAATCCTCCTGATTTTGCAAGAGATTTGTTGCCCAGATACTTTAAGCACAATAATTTTTCCAGCTTTATCCGACAGCTGAATA…	ATGGATGAAGCTCCTTGCAGCGTCAATGCACTGCCTCCGTTTATTGCAAAGATATATGAAATGGTGGATGATCCCTCCACTGATCCAATAGTCTCATGGAGTTTAAACAATAAAAGTTTTATTGTTCGTAATCCTCCTGATTTTGCAAGAGATTTGTTGCCCAGATACTTTAAGCACAATAATTTTTCCAGCTTTATCCGACAGCTGAATACTTACGGATTCAAGAAAATAGATCCCGAACAATGGGAATTCGCAAATGAGGATTTTCTTAGAGGTCAGCCACACCTTTTGAAGAATATCTATAGACGGAAACCTGTTCACAGTCATTCTGTACAGAATATTCATAGCCTCTCATCATCTGCATTGACCGAATCGGAAAGACAAGGGTATAAGGAAGAT…	MDEAPCSVNALPPFIAKIYEMVDDPSTDPIVSWSLNNKSFIVRNPPDFARDLLPRYFKHNNFSSFIRQLNTYGFKKIDPEQWEFANEDFLRGQPHLLKNIYRRKPVHSHSVQNIHSLSSSALTESERQGYKEDIEKLKHENESLHLVLHRHKQDHQGLEMQMQVLNQRVQQVKDRQKNVLSTLARTINKPGLALSLMPQLEMNERKRRLPGNSFLYNEIGLEDNQASSSENTTRENMDHTSLSTLNKEVLDQLESSLTFWEYTLRDIDQTRMRRSSSIDLDESISCADSPAISYPQLTVDVGSKVSDIDMNSEPNGNTTPDVTPPENRVETASHNVPTGVNDVFWEQFLTENPGSTDVKPEREDMESKISESKTVEDGKFWWNRKTVISLTEQLGHLTP…	FIAKIYEMVDDPSTDPIVSWSLNNKSFIVRNPPDFARDLLPRYFKHNNFSSFIRQLNTYGFKKIDPEQWEFANEDFLRGQPHLLKNIYRRKP	PFIAKIYEMVDDPSTDPIVSWSLNNKSFIVRNPPDFARDLLPRYFKHNNFSSFIRQLNTYGFKKIDPEQWEFANEDFLRGQPHLLKNIYRRKPVH
SlyHSF-21	Solyc07g055710.2	TTTTCTTCCCCTTTCTCATTGAAAACTCAAAGTATAATAATCTTCGCAATTCACATTAGAATCGTTAAAAGTAGTATATGAGTGTGCATAGTCATGGATAACTGTAATGGAGGATCAAGTTCTTCTTCTCCGGCGCCTTTTTTGTTGAAAACTTATGAACTGGTTGATGATTCGTATACTAATCCAGTTGTTTCATGGAGCCATAACGGACGTAGCTTCGTTGTTTGGAATCCACCTGAATTCGCTAGAGATTTGCTTCCGAAATACTTTAAGCATAACAATTTCTCAAGTTTTATCAGACAACTTAATACTTATGTAAGTAAAATTATTTCGTAAAAATATCTCTATCGAATCATCACCAATTGTGTTTTGTTATTTGACGATATTCATTTATTTCTA…	TTTTCTTCCCCTTTCTCATTGAAAACTCAAAGTATAATAATCTTCGCAATTCACATTAGAATCGTTAAAAGTAGTATATGAGTGTGCATAGTCATGGATAACTGTAATGGAGGATCAAGTTCTTCTTCTCCGGCGCCTTTTTTGTTGAAAACTTATGAACTGGTTGATGATTCGTATACTAATCCAGTTGTTTCATGGAGCCATAACGGACGTAGCTTCGTTGTTTGGAATCCACCTGAATTCGCTAGAGATTTGCTTCCGAAATACTTTAAGCATAACAATTTCTCAAGTTTTATCAGACAACTTAATACTTATGGGTTTAGAAAGGTTGATCCTGAACAATGGGAGTTTGCGAACGAGGATTTTTTAAGAGGACGTAGACATTTGTTGAAGAATATT…	ATGGATAACTGTAATGGAGGATCAAGTTCTTCTTCTCCGGCGCCTTTTTTGTTGAAAACTTATGAACTGGTTGATGATTCGTATACTAATCCAGTTGTTTCATGGAGCCATAACGGACGTAGCTTCGTTGTTTGGAATCCACCTGAATTCGCTAGAGATTTGCTTCCGAAATACTTTAAGCATAACAATTTCTCAAGTTTTATCAGACAACTTAATACTTATGGGTTTAGAAAGGTTGATCCTGAACAATGGGAGTTTGCGAACGAGGATTTTTTAAGAGGACGTAGACATTTGTTGAAGAATATTTATAGACGAAAGCCGATCCATAGCCACTCTGCTGCAGCAGGAACAGGGCAATCTGTAGCTCCATTGACGGATTCTGAGAGACAGGAGTATGAA…	MDNCNGGSSSSSPAPFLLKTYELVDDSYTNPVVSWSHNGRSFVVWNPPEFARDLLPKYFKHNNFSSFIRQLNTYGFRKVDPEQWEFANEDFLRGRRHLLKNIYRRKPIHSHSAAAGTGQSVAPLTDSERQEYEDEIERLKRENSLLQSSAENQLKFNGEYESGIKSMEQRLQNVAHRQGKLISLLAQLLQTPGFSSDFTQSASRKRRLLISNYLIDEENSPKFDLEMVKKLDSSINFWERFLYGVQTQDFEHTHSPIVTHTSSNDSAKRNSPIDHSPSSSELGPLNPVMSSTYENLERQLKPSDNQIECKTSKTSELVSNSGNDVFWQQFLTETPGCTEPQQVENKGINESTRDIRLGDSHRYWWNRGVNLENLAERMGHLSSPATGS	FLLKTYELVDDSYTNPVVSWSHNGRSFVVWNPPEFARDLLPKYFKHNNFSSFIRQLNTYGFRKVDPEQWEFANEDFLRGRRHLLKNIYRRK	PFLLKTYELVDDSYTNPVVSWSHNGRSFVVWNPPEFARDLLPKYFKHNNFSSFIRQLNTYGFRKVDPEQWEFANEDFLRGRRHLLKNIYRRKPIH
SlyHSF-22	Solyc07g040680.2	AGTGAGTGATGTGGAAAAAAGAAATGAAAGGATACAAATGGCAAGATGGTCTGAAACGGTCCGTTACACATTGCTTTTAGTTATTTGCTCAGTTTTCCACACACCTCTGAGCTCACCGCTTCACCCAACTATATATAGAAACCCAATTCTGTAATCAACAAATGGAAGAGGAGAAAACTATGTTGATTGATGTGAATGAGAAAGAGATGAATGTTAATGGTGGAGTAGTAGTAGAGGTGAAAGAAGAACCAGTTATATTTATTAATGATGAAGATGACATTATTGGGGATTCAGTACCAAAGCCTTTGGATGGGTTGCGTGATGTAGGTCCACCTCCGTTTTTGAAGAAGACGTTTGAAATGGTGGATGATCCAAATACCGACTCTATAATCTCATGGA…	AGTGAGTGATGTGGAAAAAAGAAATGAAAGGATACAAATGGCAAGATGGTCTGAAACGGTCCGTTACACATTGCTTTTAGTTATTTGCTCAGTTTTCCACACACCTCTGAGCTCACCGCTTCACCCAACTATATATAGAAACCCAATTCTGTAATCAACAAATGGAAGAGGAGAAAACTATGTTGATTGATGTGAATGAGAAAGAGATGAATGTTAATGGTGGAGTAGTAGTAGAGGTGAAAGAAGAACCAGTTATATTTATTAATGATGAAGATGACATTATTGGGGATTCAGTACCAAAGCCTTTGGATGGGTTGCGTGATGTAGGTCCACCTCCGTTTTTGAAGAAGACGTTTGAAATGGTGGATGATCCAAATACCGACTCTATAATCTCATGGA…	ATGGAAGAGGAGAAAACTATGTTGATTGATGTGAATGAGAAAGAGATGAATGTTAATGGTGGAGTAGTAGTAGAGGTGAAAGAAGAACCAGTTATATTTATTAATGATGAAGATGACATTATTGGGGATTCAGTACCAAAGCCTTTGGATGGGTTGCGTGATGTAGGTCCACCTCCGTTTTTGAAGAAGACGTTTGAAATGGTGGATGATCCAAATACCGACTCTATAATCTCATGGAGTAACAGTCAAAACAGCTTTGTTGTTTGGGATCCTCACAAATTTTCAATTCATCTTCTACCTAAACATTTTAAGCACAACAACTTCTCTAGCTTTATCCGCCAGCTCAATACCTATCGTTTCAGGAAAATTGATTCAGATAGATGGGAATTTGCAAATGAG…	MEEEKTMLIDVNEKEMNVNGGVVVEVKEEPVIFINDEDDIIGDSVPKPLDGLRDVGPPPFLKKTFEMVDDPNTDSIISWSNSQNSFVVWDPHKFSIHLLPKHFKHNNFSSFIRQLNTYRFRKIDSDRWEFANEGFQKGKKHLLINIKRRKQYPQLGGGGGGGAKSWVGGCCKDGTEAAEIEKLKKDHNTLKMEILKLKQQQESTDNYLATMKERLQNSEIKQKYMVIFLAKTFHNPMFVQHLIEKVKQGKTTTVENGTKKRRLCSDENQEEYTTIKSEIQTLFSCDESSNSPVEEQKGKGNNSSPEMVSENYILWEKLMEDDMICENGAETDKYQSEIVLELEDLISNPSECKCMP	FLKKTFEMVDDPNTDSIISWSNSQNSFVVWDPHKFSIHLLPKHFKHNNFSSFIRQLNTYRFRKIDSDRWEFANEGFQKGKKHLLINIKRRKQ	PFLKKTFEMVDDPNTDSIISWSNSQNSFVVWDPHKFSIHLLPKHFKHNNFSSFIRQLNTYRFRKIDSDRWEFANEGFQKGKKHLLINIKRRKQYP
SlyHSF-23	Solyc02g078340.2	GCACTACACCCTTTTGGTTGCTCAACAAAATACCATTAATATATTGCTATGGCCACAGATGATAATCGGAATATCCATCGGAAAATCGGACGGTCGACGACGAGAACCAAGTGTCCGGCGCCGTTCTTATCGAAAACTTACGATCTTTTGGAGGAGCAAGAAGAAGAAAATAGTAATCGTAATATTAAGGTTGTTTCATGGAATGGTGAAGGAAATGGATTTGTTGTGTGGTGTCCAGATGAGTTTTCTGAGGTTATGTTACCTAAATACTTCAAGCACAACAATTTCTCTAGTTTCATTCGTCAACTTAATACCTACGTAAGTCTCGATCTATATCTTCTTTCTGTCTCGATTTGTTTCACTTACTTTTCGTTTTAATTAATAAGTGGAATCATGGTT…	GCACTACACCCTTTTGGTTGCTCAACAAAATACCATTAATATATTGCTATGGCCACAGATGATAATCGGAATATCCATCGGAAAATCGGACGGTCGACGACGAGAACCAAGTGTCCGGCGCCGTTCTTATCGAAAACTTACGATCTTTTGGAGGAGCAAGAAGAAGAAAATAGTAATCGTAATATTAAGGTTGTTTCATGGAATGGTGAAGGAAATGGATTTGTTGTGTGGTGTCCAGATGAGTTTTCTGAGGTTATGTTACCTAAATACTTCAAGCACAACAATTTCTCTAGTTTCATTCGTCAACTTAATACCTACGGATTCAAGAAAGTAGCATCAAAACGTTGGGAATTTCATCATGGAAAGTTCCAGAAAGGGTGTAGACATTTGCTAGCAGAA…	ATGGCCACAGATGATAATCGGAATATCCATCGGAAAATCGGACGGTCGACGACGAGAACCAAGTGTCCGGCGCCGTTCTTATCGAAAACTTACGATCTTTTGGAGGAGCAAGAAGAAGAAAATAGTAATCGTAATATTAAGGTTGTTTCATGGAATGGTGAAGGAAATGGATTTGTTGTGTGGTGTCCAGATGAGTTTTCTGAGGTTATGTTACCTAAATACTTCAAGCACAACAATTTCTCTAGTTTCATTCGTCAACTTAATACCTACGGATTCAAGAAAGTAGCATCAAAACGTTGGGAATTTCATCATGGAAAGTTCCAGAAAGGGTGTAGACATTTGCTAGCAGAAATAACAAGAAAGAAATGTGAGCCAAGTGTATTTCCTACATACTTAAAT…	MATDDNRNIHRKIGRSTTRTKCPAPFLSKTYDLLEEQEEENSNRNIKVVSWNGEGNGFVVWCPDEFSEVMLPKYFKHNNFSSFIRQLNTYGFKKVASKRWEFHHGKFQKGCRHLLAEITRKKCEPSVFPTYLNPSKKSTLLLATNNNDQENTITRQHLMEENQNLKKERMELQMQIAHFKTLEMKLLQCLSQCVENPHNKTRRLF	FLSKTYDLLEEQEEENSNRNIKVVSWNGEGNGFVVWCPDEFSEVMLPKYFKHNNFSSFIRQLNTYGFKKVASKRWEFHHGKFQKGCRHLLAEITRKKC	PFLSKTYDLLEEQEEENSNRNIKVVSWNGEGNGFVVWCPDEFSEVMLPKYFKHNNFSSFIRQLNTYGFKKVASKRWEFHHGKFQKGCRHLLAEITRKKCEP
SlyHSF-24	Solyc09g009100.2	TTAAAATGGAGCTTCAGGAGAAAAACTCCACCGACTTTACAGAGTTGTTTACAGGAGATATTTCTTGGTTTGTATGTCGGCGTTACCTATATAAACCTCCCTTCAACCCCTTTTACCGACTTTTTATCTATCACCCTTATCGAAATTTTGAATCTTTTGATCACAAAAACTATTAAAGTTTCAATCTTTGATCCATAAAAACCACAAATCTCTTTGTATGATATGAACCCATTTGATAAAAAACAAGAATCTGATACTGATACAAAAACCCCATTTTTGACTGAAATGGACTCTGAATTTGCTGCGTTTTCACCAATTTCACTCCCTTTTGCTGACCCATCTTCTCCTTTTATCAATTTTGGATCTTTTGCCACTCCTTTGAGCCAACATCCAGTTGGA…	TTAAAATGGAGCTTCAGGAGAAAAACTCCACCGACTTTACAGAGTTGTTTACAGGAGATATTTCTTGGTTTGTATGTCGGCGTTACCTATATAAACCTCCCTTCAACCCCTTTTACCGACTTTTTATCTATCACCCTTATCGAAATTTTGAATCTTTTGATCACAAAAACTATTAAAGTTTCAATCTTTGATCCATAAAAACCACAAATCTCTTTGTATGATATGAACCCATTTGATAAAAAACAAGAATCTGATACTGATACAAAAACCCCATTTTTGACTGAAATGGACTCTGAATTTGCTGCGTTTTCACCAATTTCACTCCCTTTTGCTGACCCATCTTCTCCTTTTATCAATTTTGGATCTTTTGCCACTCCTTTGAGCCAACATCCAGTTGGA…	ATGAACCCATTTGATAAAAAACAAGAATCTGATACTGATACAAAAACCCCATTTTTGACTGAAATGGACTCTGAATTTGCTGCGTTTTCACCAATTTCACTCCCTTTTGCTGACCCATCTTCTCCTTTTATCAATTTTGGATCTTTTGCCACTCCTTTGAGCCAACATCCAGTTGGAGAAGGGGAAGGAGAAGGAGAAGGGGGAGAAATTGAACAGCCAGCTGAGGGAGGATTGGGTGTGCCGCAGCCTATGGAGTGTTTACATGGGATACAAATTCCGCCATTTTTGTCAAAGACTTTTGATTTGGTTGAGGACCCTTTATTGGATACGATTATTTCTTGGGGTAGAAATGGAGAAAGCTTTGTAGTTTGGGATCCAGTGGAGTTTTCAAGATTGGTT…	MNPFDKKQESDTDTKTPFLTEMDSEFAAFSPISLPFADPSSPFINFGSFATPLSQHPVGEGEGEGEGGEIEQPAEGGLGVPQPMECLHGIQIPPFLSKTFDLVEDPLLDTIISWGRNGESFVVWDPVEFSRLVLPRNFKHSNFSSFVRQLNTYVDKGFRKIDADRWEFANEGFSRGKRHLLKNIQRRRSHQGGSSSGSSAEAGKGTMDEIEKLRNEKSLMMQEVVELQQQQRGTVQQMESVNEKLQAAEQRQKQMVSFLAKVLQNPTFLARVRQMKEQGEITSPRTMRKFVKHQSHGPDGVGSSSMEGQIVKFRSDFQDLAGCFDSPDFNTVVDQQLPEIGLGAEAMPFEGVPVADELTVAHELLNCSDREIRGASFFNSEGSQFKGKNVASPQIEVMP…	FLSKTFDLVEDPLLDTIISWGRNGESFVVWDPVEFSRLVLPRNFKHSNFSSFVRQLNTYVDKGFRKIDADRWEFANEGFSRGKRHLLKNIQRRRSH	PFLSKTFDLVEDPLLDTIISWGRNGESFVVWDPVEFSRLVLPRNFKHSNFSSFVRQLNTYVDKGFRKIDADRWEFANEGFSRGKRHLLKNIQRRRSHQ
SlyHSF-25	Solyc02g079180.1	ATGCAGAGAGTAACGGTGATTGAGAGATTTTCTAAAACTTTCCGTGATAATCCTTCCCTTTCTAAGCTCCTCATTGTTTTCACTGTCAGGTATCTCTTTCGTTAATTTTGGTATGGTTACACGTTTCAATTTGATGAATTACTAGTTTGTTTTATTTAGTTTTCTGATTTTTAGCTACTGTGAAAAAAAAATACATATAGATGCTTGTTGTTGATGATAGGAAAGCTATGTTGAATTTGTATGTGAAGGAATAAGGTGTTGGTTACTTATGACTCGCAGTTGTAGTATGATCAAGTAGTTTCTAGATATAACTATTTTCAGATCTGCTAACTAAAATTGTAAATGATCGCGATGTTGACGAAATGTTCTATCTGCTAAGGGCATTGATATTTTGTACAG…	ATGGAAACAGAAGGAGGAAAAGGCAAAGGGAAAATGACAGAAATTGATGATATTGTTGAAGCATTGGGAGAAAGTTACGAAGGATTAGAAGATGTTCACATAGATATTTCAATGCTAGAGTATGGTGACGACAACGACGATGATAATCAATGTGACAATAGAAGCAATGAAGTAAATCATGGCAATGCTGCTGCTGTTGCTGCTACTCCTACTACTCCTAGAGAGTTGTTTTCGTCTTCATCGAATCGTCGAAATTTTCAAAGAAGAGCATCTCCCTTCGTATTGAAGATTTATGAAATGCTTGCTGATATTCAGTTCAAGTCCTTGATTTCATGGAGCAATAATGGGACCAGTTTCATTATCCATGATAATCATAAATTTGCTGTGGATGTTCTTCCC…	ATGGAAACAGAAGGAGGAAAAGGCAAAGGGAAAATGACAGAAATTGATGATATTGTTGAAGCATTGGGAGAAAGTTACGAAGGATTAGAAGATGTTCACATAGATATTTCAATGCTAGAGTATGGTGACGACAACGACGATGATAATCAATGTGACAATAGAAGCAATGAAGTAAATCATGGCAATGCTGCTGCTGTTGCTGCTACTCCTACTACTCCTAGAGAGTTGTTTTCGTCTTCATCGAATCGTCGAAATTTTCAAAGAAGAGCATCTCCCTTCGTATTGAAGATTTATGAAATGCTTGCTGATATTCAGTTCAAGTCCTTGATTTCATGGAGCAATAATGGGACCAGTTTCATTATCCATGATAATCATAAATTTGCTGTGGATGTTCTTCCC…	METEGGKGKGKMTEIDDIVEALGESYEGLEDVHIDISMLEYGDDNDDDNQCDNRSNEVNHGNAAAVAATPTTPRELFSSSSNRRNFQRRASPFVLKIYEMLADIQFKSLISWSNNGTSFIIHDNHKFAVDVLPRFFRHNNISSFVCQLNSYGFKKVSWDKFEFRHDCFQRGKGQWLRNIKRKISKSQMNEQSTERQAIDETVAFTMEKEIEEIRAEQVTMREEIMMLQRQLDVLEKEMEDINQAGSNMSSKKAKICMILFNSLFACTRGIDSTEVAEEQGGEVEDGVENSGKGNRGKKRKMLVVEELEGVNEGRKKGNPGKERKMQVIEELEGDNEGRKKIADAADFKTGSYLGRMLMDEMNLNNLDQEQPDNFLESEELAGSSTFWTDYVEKMDHKAI…	FVLKIYEMLADIQFKSLISWSNNGTSFIIHDNHKFAVDVLPRFFRHNNISSFVCQLNSYGFKKVSWDKFEFRHDCFQRGKGQWLRNIKRKISK	PFVLKIYEMLADIQFKSLISWSNNGTSFIIHDNHKFAVDVLPRFFRHNNISSFVCQLNSYGFKKVSWDKFEFRHDCFQRGKGQWLRNIKRKISKS
SlyHSF-26	Solyc02g072060.1	ATGGCTCAATTTAGAATTTCATTTTCTTGGTTCAATTTGCTTTCTCTTTTGCTAATCAATGTGTATGTTTTGGGGGTTTTCTCCTTAAGTCTTGATGGAAATGATCAGTACATTTCAGCTGTTGGAGATTCAGGGATGCGACGCGACGGGCTAAGAGTGGCCATAGAGGCATGGAATCAATGCAATGAGGTTGGTGAAGAAACCCCAAAAATGGGAAGCCCAAGGGCTGCTGATTGTTTTGATGTTCAAAACAAAGGCTCTGCTCAGCAACAGAGTGAGTTGGATTTATCTGGTTTTTTTAATTTTGTTATGTTTGAAATGGTTAGTGTTTTTATATGAGAGAATTTGTTCTGTCTGTGGTGCAGGTCCAAACATGCTGCTACATAAAGTGACTGAGGA…	ATGGAGATTAACATTCAAGAAAATGGTGGAAAGGGAGGAAGAGGAAGAAGAGGAGGAGGAGCTGTTGGTCGAGGCCGGCCGAGGCTTACCGGATTACGAGGAAACTCTCCACCACCTTTTCTAGTGAAGACATATGAAATGGTGGATGATCCTGAAACTGATCCTTTGGTACATTGGACTTCTAGCAAAACTACTTTTCTTATCACTGATCCTAACAAGTTTTGTGTTGAAGTTCTTCCAAAGTACTTCAAACATAGCAATTTATCTAGCTTCATTTACCAGCTCAATAACTATCGCTTTAGGAAGGTCTGTTCTTACAAATGTGAGTATGGAAATCCATGGTTTCGGGCTGGGAAGAAGCACTGGCTGAAAAATATCAAAAGTAGGATTCAACTATCC…	ATGGAGATTAACATTCAAGAAAATGGTGGAAAGGGAGGAAGAGGAAGAAGAGGAGGAGGAGCTGTTGGTCGAGGCCGGCCGAGGCTTACCGGATTACGAGGAAACTCTCCACCACCTTTTCTAGTGAAGACATATGAAATGGTGGATGATCCTGAAACTGATCCTTTGGTACATTGGACTTCTAGCAAAACTACTTTTCTTATCACTGATCCTAACAAGTTTTGTGTTGAAGTTCTTCCAAAGTACTTCAAACATAGCAATTTATCTAGCTTCATTTACCAGCTCAATAACTATCGCTTTAGGAAGGTCTGTTCTTACAAATGTGAGTATGGAAATCCATGGTTTCGGGCTGGGAAGAAGCACTGGCTGAAAAATATCAAAAGTAGGATTCAACTATCC…	MEINIQENGGKGGRGRRGGGAVGRGRPRLTGLRGNSPPPFLVKTYEMVDDPETDPLVHWTSSKTTFLITDPNKFCVEVLPKYFKHSNLSSFIYQLNNYRFRKVCSYKCEYGNPWFRAGKKHWLKNIKSRIQLSKENNTQQGSHSPRVDLVSNNLEEELEKLRNDHISLRVELQKLKDGQENMRSFFPMLPGCGKEKEIRNIMKLLLEKSEVRGDSSSDDTTKRTRLVESPDRVAGSVQDGIGQTSNSAGGSVSSNEKQKEEATARNAKNREFWEKLFEDESESKNEGAEESEQELNRLKAMAKIEEMVESKIAMEGESLIAKAAASLNDETEAYLQLWT	FLVKTYEMVDDPETDPLVHWTSSKTTFLITDPNKFCVEVLPKYFKHSNLSSFIYQLNNYRFRKVCSYKCEYGNPWFRAGKKHWLKNIKSRI	PFLVKTYEMVDDPETDPLVHWTSSKTTFLITDPNKFCVEVLPKYFKHSNLSSFIYQLNNYRFRKVCSYKCEYGNPWFRAGKKHWLKNIKSRIQLS

## Sheet: S2
Table S2. Physical and chemical characteristics of SlyHSF genes
ID	Name	Number of amino acids	Molecular weight	Theoretical pI	Formula	Instability index		Aliphatic index	GRAVY
SlyHSF-01	Solyc11g064990.1.1	251	29828.8	7.29	C1332H2057N379O385S9	51.99	unstable	77.21	-0.743
SlyHSF-02	Solyc08g005170.2.1	527	57700.7	5.16	C2510H3964N712O803S23	57.67	unstable	71.63	-0.569
SlyHSF-03	Solyc03g026020.2.1	338	37387.6	5.34	C1618H2550N470O526S12	68.07	unstable	62.6	-0.74
SlyHSF-04	Solyc03g097120.2.1	491	54029.6	5.07	C2347H3739N663O761S19	55.16	unstable	82.55	-0.408
SlyHSF-05	Solyc02g090820.2.1	301	33257.2	5.75	C1448H2304N398O476S11	37.03	stable	63.46	-0.746
SlyHSF-06	Solyc09g065660.2.1	372	42442.4	5.28	C1865H2905N533O583S10	58.96	unstable	65.75	-0.823
SlyHSF-07	Solyc04g078770.2.1	360	40928.7	7.72	C1797H2769N509O557S16	54.99	unstable	68.44	-0.65
SlyHSF-08	Solyc06g072750.2.1	482	54336	5.32	C2384H3761N663O757S16	53.81	unstable	75.58	-0.615
SlyHSF-09	Solyc12g098520.1.1	478	53375.1	5.4	C2317H3636N670O757S12	58.51	unstable	70.19	-0.688
SlyHSF-10	Solyc08g080540.2.1	325	35289.3	4.99	C1520H2414N446O498S12	52.33	unstable	73.57	-0.433
SlyHSF-11	Solyc04g016000.2.1	237	27566.5	8.87	C1218H1953N333O372S11	56.27	unstable	75.19	-0.701
SlyHSF-12	Solyc12g007070.1.1	369	41173.2	6.05	C1805H2801N499O567S19	65.11	unstable	58.43	-0.627
SlyHSF-13	Solyc09g082670.2.1	356	41757.6	5.38	C1834H2813N523O566S16	43.54	unstable	62.13	-0.963
SlyHSF-14	Solyc06g053960.2.1	142	16643.6	9.44	C756H1127N211O213S2	31.89	stable	61.06	-0.796
SlyHSF-15	Solyc08g076590.2.1	490	55016.7	5.16	C2416H3757N665O762S22	61.98	unstable	64.63	-0.672
SlyHSF-16	Solyc09g059520.2.1	389	44921.4	4.68	C1980H3073N517O635S20	52.43	unstable	75.14	-0.619
SlyHSF-17	Solyc02g072000.2.1	408	46168.5	5.23	C2002H3131N575O642S20	50.95	unstable	70.05	-0.726
SlyHSF-18	Solyc08g062960.2.1	351	40089	4.92	C1758H2764N484O558S15	54.17	unstable	75.73	-0.567
SlyHSF-19	Solyc10g079380.1.1	255	29916.8	7.59	C1317H2105N365O413S8	50.78	unstable	73.76	-0.868
SlyHSF-20	Solyc03g006000.2.1	401	46080.3	5.33	C2011H3155N573O646S12	44.55	unstable	73.37	-0.798
SlyHSF-21	Solyc07g055710.2.1	388	44375	6.09	C1943H2998N562O618S8	55.42	unstable	65.82	-0.84
SlyHSF-22	Solyc07g040680.2.1	356	40871.2	5.33	C1795H2831N485O566S19	57.33	unstable	70.84	-0.758
SlyHSF-23	Solyc02g078340.2.1	205	24239.7	9.39	C1067H1680N312O311S12	46.08	unstable	63.71	-0.873
SlyHSF-24	Solyc09g009100.2.1	509	56098.4	4.82	C2468H3788N676O783S20	54.9	unstable	61.28	-0.546
SlyHSF-25	Solyc02g079180.1.1	414	47140.6	4.95	C2028H3212N582O666S23	45.09	unstable	67.13	-0.77
SlyHSF-26	Solyc02g072060.1.1	339	38413.1	7.63	C1665H2662N488O532S12	44.57	unstable	66.73	-0.886

## Sheet: S3
Table S3. Protein and domain sequences of other selected plant HSF genes used for phylogenetic analysis
ID	Organism	Gene	Protein	HSF-Domain	env-Domain	No. of Amino Acids in Protein	Average No. of Amino Acids in Proteins
CreHSF-01	Chlamydomonas reinhardtii	Cre09.g387150.t1.2	MTNPANQPPPFLIKTYDLVDDPSTDNIVSWGADGHSFIVWKPPEFARDLLPKHFKHNNFSSFVRQLNTYGFRKVDPDRWEFANEHFVRGKKEQLRDIHRRKPSATHNATGTGGGASGAAAGAAAATPGAPVPSNALVAAGQTAPAIEIGAYGGFREEIDNLKRDKNVLMVELVRLRQQQATADAKIRDLTGRLENTEAKQQTMINMFAAAFKNPAMFQRMLSTMASSGVQRLTAAPAYSGGAGAAGGRRKRRARGETSVTDIGEDIAGTGVGITEAIDADMLETGGANHMAVNGVHGAAGSPPSHGHGADDTSSNGSATDATGAANGYGHQLVAYNPAVAAAAAAAGAAGGSSAAAVSGGAASTDALSEMMMRSFQSLLSGAEDMTGDVTGALNSLAIG…	FLIKTYDLVDDPSTDNIVSWGADGHSFIVWKPPEFARDLLPKHFKHNNFSSFVRQLNTYGFRKVDPDRWEFANEHFVRGKKEQLRDIHRRKPS	PFLIKTYDLVDDPSTDNIVSWGADGHSFIVWKPPEFARDLLPKHFKHNNFSSFVRQLNTYGFRKVDPDRWEFANEHFVRGKKEQLRDIHRRKPSA	801	1024.5
CreHSF-02	Chlamydomonas reinhardtii	Cre07.g354500.t1.1	MTGEGKGGGNQGQPAPFLRKTYELVDDATTNHVISWGPSGKSFIVWKPSEFAANLLPLYFKHNNFSSFVRQLNTYGFRKVDPDRWEFANEYFQQHNRDLLLTIHRRKPASTVTAPGGPGGVGPGAPGGSGSSTGPGTGSGSGSAQQKSAPGPPVSPLQQFTSQVSSEAGQPGPPGPPAPAGAPSAVLPIPLPPGVPPAAAAAAVAAAASAPFSLSPPFPLDLGIAATLPLFTAPPPTAGAGAAPGLTFPALTIPPVGVMVGPGGPLATGPGPILSTGPGPGVTPSAGSAFSRPLLPASGSGAGSGSVPSLKTELPPPHALGPLLSPQAAAAAAAAVAAAGGPSPPPAQLQQVLAALASQSGTPGSAAAGQLARDGSIEVGSGWPAGSGSGMTDGAAHAQ…	FLRKTYELVDDATTNHVISWGPSGKSFIVWKPSEFAANLLPLYFKHNNFSSFVRQLNTYGFRKVDPDRWEFANEYFQQHNRDLLLTIHRRKP	PFLRKTYELVDDATTNHVISWGPSGKSFIVWKPSEFAANLLPLYFKHNNFSSFVRQLNTYGFRKVDPDRWEFANEYFQQHNRDLLLTIHRRKPAS	1248
PabHSF-01	Picea abies	MA_110587g0010	MAQSVEQPNDATVPRPADSHRSIPTPFLMKTYRLVDDPSLDDIISWNEDGTTFIVWRPAEFARDLLPNYFKHNNFSSFVRQLNTYGFRKIVPDRWEFANEFFRRGEKKLLCEIHRRKNPQANGATANAXWEFANEFFRRGEKKLLCEIHRRKNPQANGATANMPESPSITGEDQQGCSSALLPLSSPSEAGGLLDENERLKQQNLFLMSEVAQIKSLCSDILAFMSKHANISAESLRKSLDLNNVPDSFQQGAPIDGSPAQSKDSCQRTQLCSSVHLSENETANSCGNSKEMTDGKCVDSVKAEDNDNSGSPKLFGVPLFSKKRSRPCSPDNDEKPEVNGNLFCVGNDAALKCVKAEPGLEMELRQKQAPWLKFRSARNEKVCN	FLMKTYRLVDDPSLDDIISWNEDGTTFIVWRPAEFARDLLPNYFKHNNFSSFVRQLNTYGFRKIVPDRWEFANEFFRRGEKKLLCEIHRRKN	PFLMKTYRLVDDPSLDDIISWNEDGTTFIVWRPAEFARDLLPNYFKHNNFSSFVRQLNTYGFRKIVPDRWEFANEFFRRGEKKLLCEIHRRKNPQ	384	313.474
PabHSF-02	Picea abies	MA_10432269g0010	MATPAEGSSSSPLGFVEENSQPLPPVPPQPMEGLQSSAIPPFLTKTYDMVEDPSTDPVVSWSSAGNSFIVWDPPEFSQNLLPRCFKHNNFSSFVRQLNTYGFRKVDPDRWEFANEGFLRGQKHLLKNIHRRKPVQIQQLSPPLGSCVEVGKFGLEGEVERLKRDKNVLMLELVRLRQQQHNTECEMQAMNQRLQATEQRHQQMMSFLAKAMQNPSFLAQLVQQKEKRQLAAARKRKRLPKQQQDLQGDLGPSNEGQIIKYQPNPSDNTQSLFIETLELGSDPKLEPPSSPLRALFSGSPGKNIQENSTLAGEFIAGKGIEQMIQEGVPNPVAIEITSMSHLQPPSLAALAKGKHVESSQPEDDLQGEEYLVSFGETVCSEEENTDLMGLELDLPGDVDF…	FLTKTYDMVEDPSTDPVVSWSSAGNSFIVWDPPEFSQNLLPRCFKHNNFSSFVRQLNTYGFRKVDPDRWEFANEGFLRGQKHLLKNIHRRKP	PFLTKTYDMVEDPSTDPVVSWSSAGNSFIVWDPPEFSQNLLPRCFKHNNFSSFVRQLNTYGFRKVDPDRWEFANEGFLRGQKHLLKNIHRRKPVQ	548
PabHSF-03	Picea abies	MA_12808g0010	MDGSQTSSTNNAPPPFLTKTYDMVDDPVTDSIVSWSSGNNSFIVWNPPEFARDLLPKYFKHNNFSSFVRQLNTYGFRKVDPDRWEFANEGFLRGQKHLLKNIYRRKPTHSHTQPQQQQGQSSSVGACVETVSQRLQGMEQRQQQMMSFLAKAMQNPGFLAQLVQQNENNMRIAATNKKRRLPKQEENSQDGQHGPPDGQIVKYQPALSDATKAFFMQIFNTETSNKLEPSPNGLDNFSDVGRSSSEAIDNGNGSSMGRQSGVTLTEMQGTSGFSDACVTSEISDIQVSSTLSEMHCSAELPEIVASSGFPEMVVSSGLADMHSFSNLAESIVTGTNLHTSQFELPELQSTVTVNHNGSLPSEDYMQPKILRQDANSEPIAMEMGLAIDGDRFSSEGDGD…	FLTKTYDMVDDPVTDSIVSWSSGNNSFIVWNPPEFARDLLPKYFKHNNFSSFVRQLNTYGFRKVDPDRWEFANEGFLRGQKHLLKNIYRRKP	PFLTKTYDMVDDPVTDSIVSWSSGNNSFIVWNPPEFARDLLPKYFKHNNFSSFVRQLNTYGFRKVDPDRWEFANEGFLRGQKHLLKNIYRRKPTH	477
PabHSF-04	Picea abies	MA_41252g0020	MDSAHSCSTPFITKTYEMVDDPSTDSVVSWSAGSNSFIVKNPHQFSQHLLPRYFKHGNFSSFVRQLNTYGFRKVDPDRWEFANEGFLRGQKHLLNTIHRKKATQSQQQQQHYLQGLSTPSSGFGNEGTCESYDLRGEVERLKQDKNLIVQDLDQLKNQQADTDREVEVMNKRLQVTEQRPQQMISFLVRVMENPGLIDQMLQNRQLGSRKRRRLDIQKIPQLAANGLVRDGLVAADHGGFSTQDGLIKEGLAADGFVNLDDSTMHILPDEFEFETRAGLPSKGVITASLDLDHKSEIFACNSEFCIDTSFEEDEMGWTDLEDMMTGDHIFIDNTQFTIKSEAHVAQSALVPPAKSPIDRDMPCLLCQRKRRSSSLHGRFTCLVGSYGYLVEWISVALPV…	FITKTYEMVDDPSTDSVVSWSAGSNSFIVKNPHQFSQHLLPRYFKHGNFSSFVRQLNTYGFRKVDPDRWEFANEGFLRGQKHLLNTIHRKKAT	PFITKTYEMVDDPSTDSVVSWSAGSNSFIVKNPHQFSQHLLPRYFKHGNFSSFVRQLNTYGFRKVDPDRWEFANEGFLRGQKHLLNTIHRKKATQ	424
PabHSF-05	Picea abies	MA_5374g0010	MAHSAKQNNDGTPVTVESHRSVPAPFLIKTYQLVDDSKTDDIISWNEAGTTFIVWRPAEFARDLLPNYFKHNNFSSFVRQLNTYGFRKIVPDRWEFSNEYFRKGEKQLLSEIHRRKGLIQPPPPPENRSISPSNSGDEQTWSSTSSPNSPPAVEALSHKNAMEENEKLRKENMLLVSELTQMKKLHNQLLLFLSRHVNITSADHVASFLSQSVGPSEGLSMLARLKDYLEQYGGEEISRDFPGSSLSSGVSVVNDDPFVSSSAKEIMASKRPPFVDGACREIGRKSYLSVKIEDDDEKGNPKLFGVPLLPSKRSLPGSSDNGQPESMIRKIGRCAN	FLIKTYQLVDDSKTDDIISWNEAGTTFIVWRPAEFARDLLPNYFKHNNFSSFVRQLNTYGFRKIVPDRWEFSNEYFRKGEKQLLSEIHRRK	PFLIKTYQLVDDSKTDDIISWNEAGTTFIVWRPAEFARDLLPNYFKHNNFSSFVRQLNTYGFRKIVPDRWEFSNEYFRKGEKQLLSEIHRRKGL	336
PabHSF-06	Picea abies	MA_29913g0010	MDSQNSGISAGDEVNLGNFNVKEEESMQMPSCPRPMEGLHCAGPPPFLTKTYDMVEDPLTDTVVSWSSTNNSFVVWNSHLFSSDLLPKYFKHNNFSSFVRQLNTYGFRKVDPDRWEFANEGFLRGQKHLLKLIQRRKPSCPPQFLDNLHHHHQQDQQQGMGACVEVGQFGMVGEIEGLRRDKSVLMMEVVKLRQQQQSTRNQLQTIGHRLQSTEQRQQHMMTFLARAIQNPTFLAQLSQNKQASKRLATSKKRRRLPKGEAQVNDVFWEELLNEHFDSQDDSGTEAEANFPDQDKGNFSSSSRSDVNLLAEQMGLTAFHQSIPIIPEKLIALESANVIDFLFGTGWTSDGIHQASQVVGESASNDIKIPNMIVYIFSHQHQAGHMMVAYRFDSKANQNM…	FLTKTYDMVEDPLTDTVVSWSSTNNSFVVWNSHLFSSDLLPKYFKHNNFSSFVRQLNTYGFRKVDPDRWEFANEGFLRGQKHLLKLIQRRKP	PFLTKTYDMVEDPLTDTVVSWSSTNNSFVVWNSHLFSSDLLPKYFKHNNFSSFVRQLNTYGFRKVDPDRWEFANEGFLRGQKHLLKLIQRRKPSC	442
PabHSF-07	Picea abies	MA_8845456g0010	MALLLDSCEGMLLPMESHKSMPAPFLTKTYQLVDDPATDHIVSWGEDDTTFVVWRPPEFSRDLLPNYFKHNNFSSFVRQLNTYGFRKIVPDRWEFANEFFRKGEKHLLCEIHRRKTSSQAVSSSGHGMPMSSSISPTTSDDQDWSPLSTPLSSPRGVAAATAGGGGSLMVGCSGGVGAATMHASAAAAAAAVSALSDDNERLRRNNSMLLSELTHMRKLYNDIIFFVQHHVRIPPPPPHQSGSSSSAMNMNRVKYHQQSTANPNVVPLLEAPTVPSTHRIADHRAMNPNREIVEISSSSSGSQLFVLGTARASSISFVDMKVKETTATNSSPPITVTVADQEGIKSPPMLFGVPLHGKKRLHSQWDVVDQAEANGLQEQCRNITWTPSKALKTDLVLNL…	FLTKTYQLVDDPATDHIVSWGEDDTTFVVWRPPEFSRDLLPNYFKHNNFSSFVRQLNTYGFRKIVPDRWEFANEFFRKGEKHLLCEIHRRKTS	PFLTKTYQLVDDPATDHIVSWGEDDTTFVVWRPPEFSRDLLPNYFKHNNFSSFVRQLNTYGFRKIVPDRWEFANEFFRKGEKHLLCEIHRRKTSS	404
PabHSF-08	Picea abies	MA_91466g0010	VIAIDNYPYAQIDYRGDPDIPLPPDSSYGDIGRGSSRGYVATSDSCEGMLLSVESHKSVPAPFLTKTYQLVDDPATDHIVSWGEDDTTFVVWRPPEFARDLLPNYFKHNNFSSFVRQLNTYGFRKIVPDRWEFANEFFRKGEKHLLCEIHRRKTSSQAVPSSGHGMPMSSSISPTTSDDQDWSPLSTPLSSPRGLAAATGGGGGGGSLMVGCSGGGTAAMHASAAAAAAAVSALSDDNERLRRNNSMLLSELTHMRKLYNDIIFFVQHHVRIPPPPPHQGGSSSSAMNMNMNRLKYHQQPTANPNVVPLLLEAPTVPSTPRIADARDHRIMNPNREVVEISSSSPRSQLFGLGTARASSISFVDTKLKEMAAASSSPSTSSVTVADQDGIKSPPKLFGV…	FLTKTYQLVDDPATDHIVSWGEDDTTFVVWRPPEFARDLLPNYFKHNNFSSFVRQLNTYGFRKIVPDRWEFANEFFRKGEKHLLCEIHRRKTS	PFLTKTYQLVDDPATDHIVSWGEDDTTFVVWRPPEFARDLLPNYFKHNNFSSFVRQLNTYGFRKIVPDRWEFANEFFRKGEKHLLCEIHRRKTSS	450
PabHSF-09	Picea abies	MA_10293408g0010	MEGSQNGSSNGPPPFLTKTYDMVDDPATNAMVSWSPGSNSFIVWNPTEFSRVLLPTYFKHSNFSSFVRQLNTYGFHKIDPERWEFANEGFLKGHRHLLKNIHRRKPVHSHSQQQQKGESLSGGACVEIKQLEDETEKLRQEKQGLVMELVRLKQHQQGTEFDLQSLEERLQLMEQRQQRMMAFLAKAVQNPNFVAQLVQHHDKIAHIATTNKKRRLPKHDEVLEIGENGCTSSQIVRYDPGKGDAFNRDSPDKLETSMDAFKNFFDDVPVDARDKAKDCGSPQSHSSEPTLTEMHGKSCFPDMPVSLGVSDIYTSSALSDLNSSSRLPEMSISLRSQDVQASTGLVGSLRSDVLCNLSLSPHSSSLELSKIDDAGKSVQSGSSENRSFIGSKIGSNDAI…	FLTKTYDMVDDPATNAMVSWSPGSNSFIVWNPTEFSRVLLPTYFKHSNFSSFVRQLNTYGFHKIDPERWEFANEGFLKGHRHLLKNIHRRKP	PFLTKTYDMVDDPATNAMVSWSPGSNSFIVWNPTEFSRVLLPTYFKHSNFSSFVRQLNTYGFHKIDPERWEFANEGFLKGHRHLLKNIHRRKPVH	509
PabHSF-10	Picea abies	MA_8992661g0010	MGEGGLVRDARGGVARDAGRLVAAPFLVKTYRLVDDPSTDHIVSWGDNNNTFVVWRPKEFSASVLPSYFNHTNFSSFVRQLNTYGFRKIVRGRCEFANELFRKGQKHLLSHIQRRKPSASPVQMDYGNYSLFPPILSTQHSDVSIEAPSLSEENETLRRNNSLLLSEISRLKNICSRDITLFILQNTIDPPVVDKDRKIHNAGPCSSMKDVAKEISMSPPKLFGVPLY	FLVKTYRLVDDPSTDHIVSWGDNNNTFVVWRPKEFSASVLPSYFNHTNFSSFVRQLNTYGFRKIVRGRCEFANELFRKGQKHLLSHIQRRKPS	PFLVKTYRLVDDPSTDHIVSWGDNNNTFVVWRPKEFSASVLPSYFNHTNFSSFVRQLNTYGFRKIVRGRCEFANELFRKGQKHLLSHIQRRKPSA	228
PabHSF-11	Picea abies	MA_13910g0010	MGGGGSARDSGRLVAAPFLVKTYRLVDDPSTDHIVSWGDHDNTFVVWRPKELSASVLPSYFNHANFSSFVRQLNTYGFRKVVRGRCEFANELFRKGQSHLLSHIQRRNSSTISTTQGSQMEYDKSLNHYSSATVQDSDVPAAVPSLSKENEILRRNNLLLLSEITHLQNIRRRDNKAFSRHNTLNPPSIDMDRSKIDNTSPSSSMTAVTEEISMSPPKLFGVPLY	FLVKTYRLVDDPSTDHIVSWGDHDNTFVVWRPKELSASVLPSYFNHANFSSFVRQLNTYGFRKVVRGRCEFANELFRKGQSHLLSHIQRRNSS	PFLVKTYRLVDDPSTDHIVSWGDHDNTFVVWRPKELSASVLPSYFNHANFSSFVRQLNTYGFRKVVRGRCEFANELFRKGQSHLLSHIQRRNSST	225
PabHSF-12	Picea abies	MA_8812600g0010	MEEGCVTDAGRLVAAPFLVKTYRFVDDPSTDRIVSWGDHNNTFVVWRPKEFSASVLPRYFNHTNFSSFVRQLNTYGFRKIVRGRCEFSNELFRKGQQHLLSRIRRRKSSSTSTAQASRMVEYDESLSLIPNSSFTVQDSAVPAAECSLSEENEILKRNNALLLSEIDRLQNICTGISRSLFRTTPGISTERLPGLTHLNRPKIGNAMDRKTDNLSRSSFMTDVAQENNVNPPELFGVPLY	FLVKTYRFVDDPSTDRIVSWGDHNNTFVVWRPKEFSASVLPRYFNHTNFSSFVRQLNTYGFRKIVRGRCEFSNELFRKGQQHLLSRIRRRKSS	PFLVKTYRFVDDPSTDRIVSWGDHNNTFVVWRPKEFSASVLPRYFNHTNFSSFVRQLNTYGFRKIVRGRCEFSNELFRKGQQHLLSRIRRRKSSS	240
PabHSF-13	Picea abies	MA_11527g0010	MVKKMEAQLTPTPLTATESDNERGYLRTMSNLSAVITCVTVYILLSWAAAEQEAANTGRVLMVGCGDVKDAGRLVPAPFLVKTYRLVDDPSTDHIVSWGDQNNTFVVWQPKEFSASLLPSYFNHTNFSSFVRQLNNYGFRKTVRGRCEFSNKLFWKGQQHLLSHIQRKKVSGPSRMQMEYGKSSSVFQPISSTQHSDVPTAAPPSLSDLEKETLRRNNSLLLSEIARLQNICSRDIRLLVRHNTGNPPLIDIMDRTKIDDASPSSSMTDVTEEVAMRPHKLFGVLLY	FLVKTYRLVDDPSTDHIVSWGDQNNTFVVWQPKEFSASLLPSYFNHTNFSSFVRQLNNYGFRKTVRGRCEFSNKLFWKGQQHLLSHIQRKKV	PFLVKTYRLVDDPSTDHIVSWGDQNNTFVVWQPKEFSASLLPSYFNHTNFSSFVRQLNNYGFRKTVRGRCEFSNKLFWKGQQHLLSHIQRKKVSG	287
PabHSF-14	Picea abies	MA_113508g0010	MKKLPTPLGRMGGNGARDAGRLVAAPFLVKTYRLVDDPSTDHIVSWGDHNNTIVVWRPKEFSASLLPTYFNHTNFSSFVRQLNTYGFRKIVRGRCEFANELFRKGQQHLLSHIQRRKPSSTSTTQASQMEYDKSSSSSIPDTSSTAQVSEVPAAGPSLSELNEILRNSSVLLSEIARLQNICGRNITLFIPHNTRNPPSIDMDRSKIDNPTPSSSVTDVAEEISMNPPKLFGVPLC	FLVKTYRLVDDPSTDHIVSWGDHNNTIVVWRPKEFSASLLPTYFNHTNFSSFVRQLNTYGFRKIVRGRCEFANELFRKGQQHLLSHIQRRKPS	PFLVKTYRLVDDPSTDHIVSWGDHNNTIVVWRPKEFSASLLPTYFNHTNFSSFVRQLNTYGFRKIVRGRCEFANELFRKGQQHLLSHIQRRKPSS	236
PabHSF-15	Picea abies	MA_10100585g0010	MGMDGSVRDAGRLVASPFLVKTYRLVDDPSTDHIVSWGDHKNTFVVWRPKEFSACVLPCYFNHTNFSSFVRQLNTYGFRKIVRGRCEFANDLFRKGQTHLLSHIQRRKPSSTSTTQASQIEYEKSSSSLIPYSLSTVQDSDVPAAAPSLSEENEILRRNNSLLLSEIARLQNICSRDLTLFSRQNTRNPPSIDMDRSKVDNASPTSSMTEVAEEINMTPPKLFGVPLY	FLVKTYRLVDDPSTDHIVSWGDHKNTFVVWRPKEFSACVLPCYFNHTNFSSFVRQLNTYGFRKIVRGRCEFANDLFRKGQTHLLSHIQRRKPS	PFLVKTYRLVDDPSTDHIVSWGDHKNTFVVWRPKEFSACVLPCYFNHTNFSSFVRQLNTYGFRKIVRGRCEFANDLFRKGQTHLLSHIQRRKPSS	228
PabHSF-16	Picea abies	MA_9434330g0010	MGMDGSVRDAGRLVASPFLVKTYRLVDDPSTDHIVSWGDHKNTFVVWRPKEFSACVLPCYFNHTNFSSFVRQLNTYGFRKIVRGRCEFANDLFRKGQTHLLSHIQRRKPSSTSTTQASQIEYEKSSSSLIPYSLSTVQDSDVPAAAPSLSEENEILRRNNSLLLSEIARLQNICSRDLTLFSRQNTRNPPSIDMDRSKVDNASPTSSMTEVAEEINMTPPKLFGVPLY	FLVKTYRLVDDPSTDHIVSWGDHKNTFVVWRPKEFSACVLPCYFNHTNFSSFVRQLNTYGFRKIVRGRCEFANDLFRKGQTHLLSHIQRRKPS	PFLVKTYRLVDDPSTDHIVSWGDHKNTFVVWRPKEFSACVLPCYFNHTNFSSFVRQLNTYGFRKIVRGRCEFANDLFRKGQTHLLSHIQRRKPSS	228
PabHSF-17	Picea abies	MA_10434393g0010	MATPAEGSSSSPLGFVEENSQPLPPVPPQPMEGLQSSAIPPFLTKTYDMVEDPSTDQVVSWSSAGNSFIVWDPPEFSQNLLPRCFKHNNFSSFVRQLNTYVSSPVSFNFVFSDIVL	FLTKTYDMVEDPSTDQVVSWSSAGNSFIVWDPPEFSQNLLPRCFKHNNFSSFVRQLNTY	PFLTKTYDMVEDPSTDQVVSWSSAGNSFIVWDPPEFSQNLLPRCFKHNNFSSFVRQLNTYVSSPVSFN	116
PabHSF-18	Picea abies	MA_94285g0010	MATPAEGSSSSPLGFVEENSQPLPPVPPQPMEGLQSSAIPPFLTKTYDMVEDPSTDQVVSWSSAGNSFIVWDPPEFSQNLLPRCFKHNNFSSFVRQLNTYVSSPVSFNFVFSDIVL	FLTKTYDMVEDPSTDQVVSWSSAGNSFIVWDPPEFSQNLLPRCFKHNNFSSFVRQLNTY	PFLTKTYDMVEDPSTDQVVSWSSAGNSFIVWDPPEFSQNLLPRCFKHNNFSSFVRQLNTYVSSPVSFN	116
PabHSF-19	Picea abies	MA_10428298g0010	MVDDNSTDSIVSWSPGNNSFIVWNPPEFARDLLPKYFKHNNFSSFVRQLNTYVSINNCLHSFGVFHCLIVGKRGFWGC	MVDDNSTDSIVSWSPGNNSFIVWNPPEFARDLLPKYFKHNNFSSFVRQLNTY	MVDDNSTDSIVSWSPGNNSFIVWNPPEFARDLLPKYFKHNNFSSFVRQLNTYVSIN	78
PpaHSF-01	Physcomitrella paten	Phpat.007G019500.1.p	MTTSVQGCEGFAGRKELKPAKVKFGRLEEKAILREGMTSLSLDTSCTEGASLLTYDCHRTVPAPFLTKTYHLVDDPATDDIVSWGEDETTFVVWRPPEFARDLLPNYFKHNNFSSFVRQLNTYGFRKIVPDHWEFANKFFRRGEKHLLCEIHRRKSSTHASGPFSLSCDAPGSQSTSPTNSGEDQAWSPFPSPLSSPSTILMPQGASTLMSDENERLRHDNRMLLLELSRLRRLYDDLVVILQQQSKVSLQELPSPSLS	FLTKTYHLVDDPATDDIVSWGEDETTFVVWRPPEFARDLLPNYFKHNNFSSFVRQLNTYGFRKIVPDHWEFANKFFRRGEKHLLCEIHRRKSS	PFLTKTYHLVDDPATDDIVSWGEDETTFVVWRPPEFARDLLPNYFKHNNFSSFVRQLNTYGFRKIVPDHWEFANKFFRRGEKHLLCEIHRRKSST	259	437.875
PpaHSF-02	Physcomitrella paten	Phpat.021G066200.1.p	MSLAFDNSETGCMLFYDCHRSVPAPFLTKTYHLVNDPATNDIVSWGEDGTTFVVWRPPEFARDLLPNYFKHNNFSSFVRQLNTYGFRKVVPERWEFANDYFRRGERHLLCEIHRRKALQPASGTGSAQQSRSLSPSTSIEDQAWSPISSPMSSPLPISVPTQHPTLPVMSISDENERLRKDNNLLLCEVSRLRRLYEETVSIIHQQYKATPTDFSALTSSLAGVEYSLIKSFGVGASGQSLETAGSVTALSGDAASQHRSLNPISRGDFEIPELSVHVRTTNHNFCKTISPPTFPERAPNAVFINPGNPKFPTGPKLTASAESLNSSNKLVKLFGVPLHSQVAISEPATIRREPAAVASTGLKRRQSDSPWDPVCEISDMDAPLCDQVFVRPPPRKCLR…	FLTKTYHLVNDPATNDIVSWGEDGTTFVVWRPPEFARDLLPNYFKHNNFSSFVRQLNTYGFRKVVPERWEFANDYFRRGERHLLCEIHRRKA	PFLTKTYHLVNDPATNDIVSWGEDGTTFVVWRPPEFARDLLPNYFKHNNFSSFVRQLNTYGFRKVVPERWEFANDYFRRGERHLLCEIHRRKALQ	426
PpaHSF-03	Physcomitrella paten	Phpat.011G075800.1.p	MGGETQWPSAEAKEKNGIPPPAGGTASGNPTSQMDAPQSSGPPPFLTKTFEMVDDPATDAIVSWSEVGSSFVVWNTPEFAQELLPKYFKHNNFSSFVRQLNTYGFRKVDPDRWEFANEGFLRGRRDLLRSIHRRKPSSHAQQQQGAYVEGGKSGLEAEIERLKTDKNVLMLELARVRQQQQSTFRDLQLMAQRLHVSESRQQRMITFLAKAMANPSLFAQFVSQQNESNHLVRKKRRLPIQEDGDMDESMSPESSIENQIVTYQPSELGEARARARVIEIFCSSDSHSAMDSRHFEALMREPDTSPNSGDSNILNRQSRVTVEEINTKLPDIFSSAPVVIDVSVNEAQEATSISPLNFDIMRASSGDKSAERSRHPHSEYRDSNDLHEPDCNRGTASHE…	FLTKTFEMVDDPATDAIVSWSEVGSSFVVWNTPEFAQELLPKYFKHNNFSSFVRQLNTYGFRKVDPDRWEFANEGFLRGRRDLLRSIHRRKPS	PFLTKTFEMVDDPATDAIVSWSEVGSSFVVWNTPEFAQELLPKYFKHNNFSSFVRQLNTYGFRKVDPDRWEFANEGFLRGRRDLLRSIHRRKPSS	476
PpaHSF-04	Physcomitrella paten	Phpat.001G130200.1.p	MVSQVLKTDPHWPPLEESMGQERYALNTDVIPSSAVPGSLNSSVPQPMDVLQSTAPPPFLTKTYDMVDDPATDPVVSWSAGNNSFIVWNPPDFAQELLPKYFKHNNFSSFVRQLNTYGFRKVDPDRWEFANEGFLRGRRDLLRSIHRRKPATHSQQSVQQQQQQQHQQSEQGPVGPCVEVGKFGLEGEIERLKRDKNVLMMELVRLRQQQQNTERDLQAMGQRLLTTENRQQHMMSFLAKAMQNPSFLAQLMQQSENKRLAATVRKKRRLPKQDSSGDDSANSDSPADNQIVAFHSNGNADSNGARAMIMQFFNSTDAASSPSLDSGPLEALFRDLGSAPSGTDVGTLASRQSGVTLTEMNIPGLGDSLPGPVVMDASTEISDMHIPSPLSNRIPRLEG…	FLTKTYDMVDDPATDPVVSWSAGNNSFIVWNPPDFAQELLPKYFKHNNFSSFVRQLNTYGFRKVDPDRWEFANEGFLRGRRDLLRSIHRRKP	PFLTKTYDMVDDPATDPVVSWSAGNNSFIVWNPPDFAQELLPKYFKHNNFSSFVRQLNTYGFRKVDPDRWEFANEGFLRGRRDLLRSIHRRKPAT	529
PpaHSF-05	Physcomitrella paten	Phpat.007G036000.1.p	MGSETPWPSVETHDNAGKLALAAGIASANPAPQMDAPPQSSGPPPFLIKTYEMVEVSATDAIVSWSEVGNSFVVWNPPEFAQDLLPKYFKHNNFSSFVRQLNTYGFRKVDPDRWEFANEGFMRGKRDMLRSIRRRKPAVHTQQQQGSCVEVGKLGLEGEIERLKRDKNVLMLELVRLRQQQQSTERELQVMTQRFHVSEHRQQRMISFLTKAMQNPSFFAQFVSQQNENNQVVRKKRRLPIHEYGDMHESMSPESSIENQMVAFQPSELGEAGARARVIEMFRSSDSQPATESSRFEGLVREADTSPNSGDSNMLNRQPRATLELNTKLSGIFSSAPIVTDVSANESLEAPPTSPQTFDMARVLSGSRSERRDSGDSHEPEGNRGTATHEAEVQSARTD…	FLIKTYEMVEVSATDAIVSWSEVGNSFVVWNPPEFAQDLLPKYFKHNNFSSFVRQLNTYGFRKVDPDRWEFANEGFMRGKRDMLRSIRRRKP	PFLIKTYEMVEVSATDAIVSWSEVGNSFVVWNPPEFAQDLLPKYFKHNNFSSFVRQLNTYGFRKVDPDRWEFANEGFMRGKRDMLRSIRRRKPAV	467
PpaHSF-06	Physcomitrella paten	Phpat.002G041200.1.p	MVSQVVKTDPHWPPLEESMGQERYSLNSDVVPSSSVPGFHNLSAPQPMDGLQSTAPPPFLTKTYDMVDDPATDPVVSWSTGHNSFIVWNPPDFAQELLPKYFKHNNFSSFVRQLNTYGFRKVDPDRWEFANEGFLRGRRDLLRTIHRRKPATHSQQSAQQQQQHQQTDQGSVGPCVEVGKFGLEGEIERLKRDKNVLMMELVRLRQQQQNTERDLQAMGQRLLTTENRQQHMMSFLAKAMQNPSFLAQLMQQSENKRLAATVRKKRRLPKQDSSADDSVSSDSPADNQIVAFHSNGNADANGARAMIMQFFNSTDAASAPSLDSGPLEALFRDLGSAPSGPDALNRQSGVTLTEMNISGLGDALPGPAVMDASTEVPDLPMPQHLTSRIPRLEGALSMN…	FLTKTYDMVDDPATDPVVSWSTGHNSFIVWNPPDFAQELLPKYFKHNNFSSFVRQLNTYGFRKVDPDRWEFANEGFLRGRRDLLRTIHRRKP	PFLTKTYDMVDDPATDPVVSWSTGHNSFIVWNPPDFAQELLPKYFKHNNFSSFVRQLNTYGFRKVDPDRWEFANEGFLRGRRDLLRTIHRRKPAT	525
PpaHSF-07	Physcomitrella paten	Phpat.022G035000.1.p	MSLSFDNSETGCMLLFDCHRSIPAPFLTKTYHLVNDPSTNEIVSWGETNTTFVVWRPPEFARDLLPKYFKHNNFSSFVRQLNTYGFRKIVPERWEFASDFFRRGERHLLCEIHRRKALQPVSVTGSVQQSRSLSPTSIEDQAWSSITSAMPSPLQIIVPTHQNVTTIGVSDEMEKLRKDNNMLLSEVSRLSRLYEEAMAIIQHQNFKGSSPDLITYSRIGASGQSIDRTASAPLPGEPAIHQQFVGPVVRMEGFRELSSVHTRTTNFDPYRSPLLPTSAIQEKPSNESIISGDSKPTSLCVKPTEAASSSNTSNETTPEGTRVTVKLFGVPLHGQAGDPGSFNHEASEVGMKRHQPESWDTVYNPGSPRKYLRLETTPESRPSTPQQQVPWLQISATRD…	FLTKTYHLVNDPSTNEIVSWGETNTTFVVWRPPEFARDLLPKYFKHNNFSSFVRQLNTYGFRKIVPERWEFASDFFRRGERHLLCEIHRRKA	PFLTKTYHLVNDPSTNEIVSWGETNTTFVVWRPPEFARDLLPKYFKHNNFSSFVRQLNTYGFRKIVPERWEFASDFFRRGERHLLCEIHRRKALQ	404
PpaHSF-08	Physcomitrella paten	Phpat.018G030500.1.p	MSLSFNNSEAGCMLFYDCHRSVPAPFLTKTYHLVSDPSTNEIVSWGEDDTTFVVWRPPEFARDLLPNYFKHNNFSSFVRQLNTYGFRKVVPDRWEFANDFFRRGERHLLCEIYRRKALQPASCSGSAKQSRSLSPSTSIEEQAWSPVSSPMSSPLPVIVETQHLTPPVMSISDENERLRKDNNLLLSEISRLRRLYEETIYMIQHQFKGLTSDLTSFTSRIGASSQSLDHSVPSTTVSGDAAMQHRNLNPLPLASRMDSEIYELSVQVRTTHQQYCKAGPHPAFVERRPQAEIINTVDSKLLTGPKLTTAHALSNPSNNPVKLFGVPLHSQVAGTEPVKMIRREPVAVAAAGMKRLQPDSSWDSVSDISEMNVPLRDQVSLRPPPRKCLRPESELRPST…	FLTKTYHLVSDPSTNEIVSWGEDDTTFVVWRPPEFARDLLPNYFKHNNFSSFVRQLNTYGFRKVVPDRWEFANDFFRRGERHLLCEIYRRKA	PFLTKTYHLVSDPSTNEIVSWGEDDTTFVVWRPPEFARDLLPNYFKHNNFSSFVRQLNTYGFRKVVPDRWEFANDFFRRGERHLLCEIYRRKALQ	417
SmoHSF-01	Selaginella moellendorffii	107503	MQESGLRSAASPQPLEALQGNAPPPFLTKTYDMVDDPATNGIISWSATNNSFVVWNPPEFSRDLLPRYFKHSNYSSFVRQLNTYGFKKVDPDRWEFANEDFLRGQKSLLKNIHRRRNVGGTSSGSPRSSPSISTVVAEQQPCVEVGQFGGVEGEVERLRRDRNMLMVELVRMRQQQILTQRGMQQMMQRLQ	FLTKTYDMVDDPATNGIISWSATNNSFVVWNPPEFSRDLLPRYFKHSNYSSFVRQLNTYGFKKVDPDRWEFANEDFLRGQKSLLKNIHRRRN	PFLTKTYDMVDDPATNGIISWSATNNSFVVWNPPEFSRDLLPRYFKHSNYSSFVRQLNTYGFKKVDPDRWEFANEDFLRGQKSLLKNIHRRRNVG	191	175.143
SmoHSF-02	Selaginella moellendorffii	25564	SHRSVPAPFLTKTFHLVDDSSTDDVVSWSEDGTTFVVWRPPEFAKDILPNYFKHNNFSSFVRQLNTYGFRKIVSDRWEFANEYFRKGQQDLLCEIHRRKTGQPNTMQPIRQTSTAEDILWSHVTTTSPVPSPRAPHFTAAVSICDENERLRRDNCILMSELSRLRRLNDEVLLFVQNQ	FLTKTFHLVDDSSTDDVVSWSEDGTTFVVWRPPEFAKDILPNYFKHNNFSSFVRQLNTYGFRKIVSDRWEFANEYFRKGQQDLLCEIHRRKT	PFLTKTFHLVDDSSTDDVVSWSEDGTTFVVWRPPEFAKDILPNYFKHNNFSSFVRQLNTYGFRKIVSDRWEFANEYFRKGQQDLLCEIHRRKTGQ	178
SmoHSF-03	Selaginella moellendorffii	37324	PAQPMDSSNSAPPPFLNKTYDMVEDPSTDPIVSWNPSGNGFIVWNLNEFQQQLLPKFFKHNNFSSFVRQLNTYGFRKVDPDRWEFGNEGFLKGKKQLLKGIHRKKSASHQPPAVQQPQPQPQPSSKPACVEVGKFGLEGEIERLKRDKNVLMSELVRLRQQQQQTDSDLQMILQRL	FLNKTYDMVEDPSTDPIVSWNPSGNGFIVWNLNEFQQQLLPKFFKHNNFSSFVRQLNTYGFRKVDPDRWEFGNEGFLKGKKQLLKGIHRKKSA	PFLNKTYDMVEDPSTDPIVSWNPSGNGFIVWNLNEFQQQLLPKFFKHNNFSSFVRQLNTYGFRKVDPDRWEFGNEGFLKGKKQLLKGIHRKKSAS	176
SmoHSF-04	Selaginella moellendorffii	39384	PFLTKTYDMIDDASSDPVVSWSSKGTSFVVWNPPEFARDLLPQYFKHNNFSSFVRQLNTYGFRKVDPDRWEFANEEFVRGDRSLLRNITRKK	FLTKTYDMIDDASSDPVVSWSSKGTSFVVWNPPEFARDLLPQYFKHNNFSSFVRQLNTYGFRKVDPDRWEFANEEFVRGDRSLLRNITRKK	PFLTKTYDMIDDASSDPVVSWSSKGTSFVVWNPPEFARDLLPQYFKHNNFSSFVRQLNTYGFRKVDPDRWEFANEEFVRGDRSLLRNITRKK	92
SmoHSF-05	Selaginella moellendorffii	93081	MILPSQQQNGQQLQPDAALSSAAPPPFLTKTYDMIDDPDSDAIVSWTGKGNSFVVWNPLDFSRDLLPKYFKHNNFSSFVRQLNTYGFRKVDPDRCEFANEGFRRGERHLLKNIHRKKPTSQGHSQHQPGQSTEVGKLGLEGEVDRLNRDKNVLMLELVRLRQQQQQTERELQVMGQRL	FLTKTYDMIDDPDSDAIVSWTGKGNSFVVWNPLDFSRDLLPKYFKHNNFSSFVRQLNTYGFRKVDPDRCEFANEGFRRGERHLLKNIHRKKP	PFLTKTYDMIDDPDSDAIVSWTGKGNSFVVWNPLDFSRDLLPKYFKHNNFSSFVRQLNTYGFRKVDPDRCEFANEGFRRGERHLLKNIHRKKPTS	178
SmoHSF-06	Selaginella moellendorffii	39375	PFLTKTFQLVDDPGSDDIVSWGSDGTTFVVWKPPEFATDLLPSYFKHNNFSSFVRQLNTYGFRKVVPDRWEFANEFFRKGERQLLSEIHRRK	FLTKTFQLVDDPGSDDIVSWGSDGTTFVVWKPPEFATDLLPSYFKHNNFSSFVRQLNTYGFRKVVPDRWEFANEFFRKGERQLLSEIHRRK	PFLTKTFQLVDDPGSDDIVSWGSDGTTFVVWKPPEFATDLLPSYFKHNNFSSFVRQLNTYGFRKVVPDRWEFANEFFRKGERQLLSEIHRRK	92
SmoHSF-07	Selaginella moellendorffii	92634	MALSFDSSDGCVLSVDSHRVVPAPFLTKTYQLVDDAASNDIVSWGEDGSTFVVWRPPEFARDLLPNYFKHNNFSSFVRQLNTYGFRKVVPDRWEFANDFFRKGERHLLCEIHRRKAQCSLAHLQHYGSLSPSTSGDDPQQLACNSSAAAAAAAAAAWSSSPLHSPRGICSASSTAAVVTATSLSLSDENERLRRDNCILLSELARLQKLYDDALLFLQHNMRPAAKFSPSSPGRASVDDQQRDVEDDHTSPGGMIKSAGPKLFGVVLHGRKRLHPDQQADNQDAAVIKAAKIELELMPSTRSEAPWLKLRASRDDRVCI	FLTKTYQLVDDAASNDIVSWGEDGSTFVVWRPPEFARDLLPNYFKHNNFSSFVRQLNTYGFRKVVPDRWEFANDFFRKGERHLLCEIHRRKA	PFLTKTYQLVDDAASNDIVSWGEDGSTFVVWRPPEFARDLLPNYFKHNNFSSFVRQLNTYGFRKVVPDRWEFANDFFRKGERHLLCEIHRRKAQC	319
AthHSF-A1a	Arabidopsis thaliana	AT4G17750	MFVNFKYFSFFIRTKMDGVTGGGTNIGEAVTAPPPRNPHPATLLNANSLPPPFLSKTYDMVEDPATDAIVSWSPTNNSFIVWDPPEFSRDLLPKYFKHNNFSSFVRQLNTYGFRKVDPDRWEFANEGFLRGQKHLLKKISRRKSVQGHGSSSSNPQSQQLSQGQGSMAALSSCVEVGKFGLEEEVEQLKRDKNVLMQELVKLRQQQQTTDNKLQVLVKHLQVMEQRQQQIMSFLAKAVQNPTFLSQFIQKQTDSNMHVTEANKKRRLREDSTAATESNSHSHSLEASDGQIVKYQPLRNDSMMWNMMKTDDKYPFLDGFSSPNQVSGVTLQEVLPITSGQSQAYASVPSGQPLSYLPSTSTSLPDTIMPETSQIPQLTRESINDFPTENFMDTEKNVPE…	FLSKTYDMVEDPATDAIVSWSPTNNSFIVWDPPEFSRDLLPKYFKHNNFSSFVRQLNTYGFRKVDPDRWEFANEGFLRGQKHLLKKISRRKS	PFLSKTYDMVEDPATDAIVSWSPTNNSFIVWDPPEFSRDLLPKYFKHNNFSSFVRQLNTYGFRKVDPDRWEFANEGFLRGQKHLLKKISRRKSVQ	495	367.952
AthHSF-A1b	Arabidopsis thaliana	AT5G16820	MESVPESVPSPNSNTPSIPPPVNSVPPFLSKTYDMVDDPLTNEVVSWSSGNNSFVVWSAPEFSKVLLPKYFKHNNFSSFVRQLNTYGFRKVDPDRWEFANEGFLRGRKQLLKSIVRRKPSHVQQNQQQTQVQSSSVGACVEVGKFGIEEEVERLKRDKNVLMQELVRLRQQQQATENQLQNVGQKVQVMEQRQQQMMSFLAKAVQSPGFLNQLVQQNNNDGNRQIPGSNKKRRLPVDEQENRGDNVANGLNRQIVRYQPSINEAAQNMLRQFLNTSTSPRYESVSNNPDSFLLGDVPSSTSVDNGNPSSRVSGVTLAEFSPNTVQSATNQVPEASLAHHPQAGLVQPNIGQSPAQGAAPADSWSPEFDLVGCETDSGECFDPIMAVLDESEGDAISPEG…	FLSKTYDMVDDPLTNEVVSWSSGNNSFVVWSAPEFSKVLLPKYFKHNNFSSFVRQLNTYGFRKVDPDRWEFANEGFLRGRKQLLKSIVRRKPS	PFLSKTYDMVDDPLTNEVVSWSSGNNSFVVWSAPEFSKVLLPKYFKHNNFSSFVRQLNTYGFRKVDPDRWEFANEGFLRGRKQLLKSIVRRKPSH	481
AthHSF-A1d	Arabidopsis thaliana	AT1G32330	MDVSKVTTSDGGGDSMETKPSPQPQPAAILSSNAPPPFLSKTYDMVDDHNTDSIVSWSANNNSFIVWKPPEFARDLLPKNFKHNNFSSFVRQLNTYGFRKVDPDRWEFANEGFLRGQKHLLQSITRRKPAHGQGQGHQRSQHSNGQNSSVSACVEVGKFGLEEEVERLKRDKNVLMQELVRLRQQQQSTDNQLQTMVQRLQGMENRQQQLMSFLAKAVQSPHFLSQFLQQQNQQNESNRRISDTSKKRRFKRDGIVRNNDSATPDGQIVKYQPPMHEQAKAMFKQLMKMEPYKTGDDGFLLGNGTSTTEGTEMETSSNQVSGITLKEMPTASEIQSSSPIETTPENVSAASEATENCIPSPDDLTLPDFTHMLPENNSEKPPESFMEPNLGGSSPLLDP…	FLSKTYDMVDDHNTDSIVSWSANNNSFIVWKPPEFARDLLPKNFKHNNFSSFVRQLNTYGFRKVDPDRWEFANEGFLRGQKHLLQSITRRKP	PFLSKTYDMVDDHNTDSIVSWSANNNSFIVWKPPEFARDLLPKNFKHNNFSSFVRQLNTYGFRKVDPDRWEFANEGFLRGQKHLLQSITRRKPAH	485
AthHSF-A1e	Arabidopsis thaliana	AT3G02990	MGTVCESVATAKSSTAVMSSIPPFLSKTYDMVDDPLTDDVVSWSSGNNSFVVWNVPEFAKQFLPKYFKHNNFSSFVRQLNTYGFRKVDPDRWEFANEGFLRGQKQILKSIVRRKPAQVQPPQQPQVQHSSVGACVEVGKFGLEEEVERLQRDKNVLMQELVRLRQQQQVTEHHLQNVGQKVHVMEQRQQQMMSFLAKAVQSPGFLNQFSQQSNEANQHISESNKKRRLPVEDQMNSGSHGVNGLSRQIVRYQSSMNDATNTMLQQIQQMSNAPSHESLSSNNGSFLLGDVPNSNISDNGSSSNGSPEVTLADVSSIPAGFYPAMKYHEPCETNQVMETNLPFSQGDLLPPTQGAAASGSSSSDLVGCETDNGECLDPIMAVLDGALELEADTLNELLPE…	FLSKTYDMVDDPLTDDVVSWSSGNNSFVVWNVPEFAKQFLPKYFKHNNFSSFVRQLNTYGFRKVDPDRWEFANEGFLRGQKQILKSIVRRKP	PFLSKTYDMVDDPLTDDVVSWSSGNNSFVVWNVPEFAKQFLPKYFKHNNFSSFVRQLNTYGFRKVDPDRWEFANEGFLRGQKQILKSIVRRKPAQ	468
AthHSF-A2	Arabidopsis thaliana	AT2G26150	MEELKVEMEEETVTFTGSVAASSSVGSSSSPRPMEGLNETGPPPFLTKTYEMVEDPATDTVVSWSNGRNSFVVWDSHKFSTTLLPRYFKHSNFSSFIRQLNTYGFRKIDPDRWEFANEGFLAGQKHLLKNIKRRRNMGLQNVNQQGSGMSCVEVGQYGFDGEVERLKRDHGVLVAEVVRLRQQQHSSKSQVAAMEQRLLVTEKRQQQMMTFLAKALNNPNFVQQFAVMSKEKKSLFGLDVGRKRRLTSTPSLGTMEENLLHDQEFDRMKDDMEMLFAAAIDDEANNSMPTKEEQCLEAMNVMMRDGNLEAALDVKVEDLVGSPLDWDSQDLHDMVDQMGFLGSEP	FLTKTYEMVEDPATDTVVSWSNGRNSFVVWDSHKFSTTLLPRYFKHSNFSSFIRQLNTYGFRKIDPDRWEFANEGFLAGQKHLLKNIKRRRN	PFLTKTYEMVEDPATDTVVSWSNGRNSFVVWDSHKFSTTLLPRYFKHSNFSSFIRQLNTYGFRKIDPDRWEFANEGFLAGQKHLLKNIKRRRNMG	345
AthHSF-A3	Arabidopsis thaliana	AT5G03720	MSPKKDAVSKPTPISVPVSRRSDIPGSLYVDTDMGFSGSPLPMPLDILQGNPIPPFLSKTFDLVDDPTLDPVISWGLTGASFVVWDPLEFARIILPRNFKHNNFSSFVRQLNTYGFRKIDTDKWEFANEAFLRGKKHLLKNIHRRRSPQSNQTCCSSTSQSQGSPTEVGGEIEKLRKERRALMEEMVELQQQSRGTARHVDTVNQRLKAAEQRQKQLLSFLAKLFQNRGFLERLKNFKGKEKGGALGLEKARKKFIKHHQQPQDSPTGGEVVKYEADDWERLLMYDEETENTKGLGGMTSSDPKGKNLMYPSEEEMSKPDYLMSFPSPEGLIKQEETTWSMGFDTTIPSFSNTDAWGNTMDYNDVSEFGFAAETTSDGLPDVCWEQFAAGITETGFNWP…	FLSKTFDLVDDPTLDPVISWGLTGASFVVWDPLEFARIILPRNFKHNNFSSFVRQLNTYGFRKIDTDKWEFANEAFLRGKKHLLKNIHRRRS	PFLSKTFDLVDDPTLDPVISWGLTGASFVVWDPLEFARIILPRNFKHNNFSSFVRQLNTYGFRKIDTDKWEFANEAFLRGKKHLLKNIHRRRSPQ	412
AthHSF-A4a	Arabidopsis thaliana	AT4G18880	MDENNHGVSSSSLPPFLTKTYEMVDDSSSDSIVSWSQSNKSFIVWNPPEFSRDLLPRFFKHNNFSSFIRQLNTYGFRKADPEQWEFANDDFVRGQPHLMKNIHRRKPVHSHSLPNLQAQLNPLTDSERVRMNNQIERLTKEKEGLLEELHKQDEEREVFEMQVKELKERLQHMEKRQKTMVSFVSQVLEKPGLALNLSPCVPETNERKRRFPRIEFFPDEPMLEENKTCVVVREEGSTSPSSHTREHQVEQLESSIAIWENLVSDSCESMLQSRSMMTLDVDESSTFPESPPLSCIQLSVDSRLKSPPSPRIIDMNCEPDGSKEQNTVAAPPPPPVAGANDGFWQQFFSENPGSTEQREVQLERKDDKDKAGVRTEKCWWNSRNVNAITEQLGHLTSSE…	FLTKTYEMVDDSSSDSIVSWSQSNKSFIVWNPPEFSRDLLPRFFKHNNFSSFIRQLNTYGFRKADPEQWEFANDDFVRGQPHLMKNIHRRKP	PFLTKTYEMVDDSSSDSIVSWSQSNKSFIVWNPPEFSRDLLPRFFKHNNFSSFIRQLNTYGFRKADPEQWEFANDDFVRGQPHLMKNIHRRKPVH	401
AthHSF-A4c	Arabidopsis thaliana	AT5G45710	MDENNGGSSSLPPFLTKTYEMVDDSSSDSVVAWSENNKSFIVKNPAEFSRDLLPRFFKHKNFSSFIRQLNTYGFRKVDPEKWEFLNDDFVRGRPYLMKNIHRRKPVHSHSLVNLQAQNPLTESERRSMEDQIERLKNEKEGLLAELQNQEQERKEFELQVTTLKDRLQHMEQHQKSIVAYVSQVLGKPGLSLNLENHERRKRRFQENSLPPSSSHIEQVEKLESSLTFWENLVSESCEKSGLQSSSMDHDAAESSLSIGDTRPKSSKIDMNSEPPVTVTAPAPKTGVNDDFWEQCLTENPGSTEQQEVQSERRDVGNDNNGNKIGNQRTYWWNSGNVNNITEKAS	FLTKTYEMVDDSSSDSVVAWSENNKSFIVKNPAEFSRDLLPRFFKHKNFSSFIRQLNTYGFRKVDPEKWEFLNDDFVRGRPYLMKNIHRRKP	PFLTKTYEMVDDSSSDSVVAWSENNKSFIVKNPAEFSRDLLPRFFKHKNFSSFIRQLNTYGFRKVDPEKWEFLNDDFVRGRPYLMKNIHRRKPVH	345
AthHSF-A5	Arabidopsis thaliana	AT4G13980	MNGALGNSSASVSGGEGAGGPAPFLVKTYEMVDDSSTDQIVSWSANNNSFIVWNHAEFSRLLLPTYFKHNNFSSFIRQLNTYGFRKIDPERWEFLNDDFIKDQKHLLKNIHRRKPIHSHSHPPASSTDQERAVLQEQMDKLSREKAAIEAKLLKFKQQKVVAKHQFEEMTEHVDDMENRQKKLLNFLETAIRNPTFVKNFGKKVEQLDISAYNKKRRLPEVEQSKPPSEDSHLDNSSGSSRRESGNIFHQNFSNKLRLELSPADSDMNMVSHSIQSSNEEGASPKGILSGGDPNTTLTKREGLPFAPEALELADTGTCPRRLLLNDNTRVETLQQRLTSSEETDGSFSCHLNLTLASAPLPDKTASQIAKTTLKSQELNFNSIETSASEKNRGRQEIAV…	FLVKTYEMVDDSSTDQIVSWSANNNSFIVWNHAEFSRLLLPTYFKHNNFSSFIRQLNTYGFRKIDPERWEFLNDDFIKDQKHLLKNIHRRK	PFLVKTYEMVDDSSTDQIVSWSANNNSFIVWNHAEFSRLLLPTYFKHNNFSSFIRQLNTYGFRKIDPERWEFLNDDFIKDQKHLLKNIHRRKPIH	466
AthHSF-A6a	Arabidopsis thaliana	AT5G43840	MDYNLPIPLEGLKETPPTAFLTKTYNIVEDSSTNNIVSWSRDNNSFIVWEPETFALICLPRCFKHNNFSSFVRQLNTYGFKKIDTERWEFANEHFLKGERHLLKNIKRRKTSSQTQTQSLEGEIHELRRDRMALEVELVRLRRKQESVKTYLHLMEEKLKVTEVKQEMMMNFLLKKIKKPSFLQSLRKRNLQGIKNREQKQEVISSHGVEDNGKFVKAEPEEYGDDIDDQCGGVFDYGDELHIASMEHQGQGEDEIEMDSEGIWKGFVLSEEEMCDLVEHFI	AFLTKTYNIVEDSSTNNIVSWSRDNNSFIVWEPETFALICLPRCFKHNNFSSFVRQLNTYGFKKIDTERWEFANEHFLKGERHLLKNIKRRKTS	AFLTKTYNIVEDSSTNNIVSWSRDNNSFIVWEPETFALICLPRCFKHNNFSSFVRQLNTYGFKKIDTERWEFANEHFLKGERHLLKNIKRRKTSS	282
AthHSF-A6b	Arabidopsis thaliana	AT3G22830	MDPSFRFIKEEFPAGFSDSPSPPSSSSYLYSSSMAEAAINDPTTLSYPQPLEGLHESGPPPFLTKTYDLVEDSRTNHVVSWSKSNNSFIVWDPQAFSVTLLPRFFKHNNFSSFVRQLNTYGFRKVNPDRWEFANEGFLRGQKHLLKNIRRRKTSNNSNQMQQPQSSEQQSLDNFCIEVGRYGLDGEMDSLRRDKQVLMMELVRLRQQQQSTKMYLTLIEEKLKKTESKQKQMMSFLARAMQNPDFIQQLVEQKEKRKEIEEAISKKRQRPIDQGKRNVEDYGDESGYGNDVAASSSALIGMSQEYTYGNMSEFEMSELDKLAMHIQGLGDNSSAREEVLNVEKGNDEEEVEDQQQGYHKENNEIYGEGFWEDLLNEGQNFDFEGDQENVDVLIQQLGYL…	FLTKTYDLVEDSRTNHVVSWSKSNNSFIVWDPQAFSVTLLPRFFKHNNFSSFVRQLNTYGFRKVNPDRWEFANEGFLRGQKHLLKNIRRRKTS	PFLTKTYDLVEDSRTNHVVSWSKSNNSFIVWDPQAFSVTLLPRFFKHNNFSSFVRQLNTYGFRKVNPDRWEFANEGFLRGQKHLLKNIRRRKTSN	406
AthHSF-A7a	Arabidopsis thaliana	AT3G51910	MMNPFLPEGCDPPPPPQPMEGLHENAPPPFLTKTFEMVDDPNTDHIVSWNRGGTSFVVWDLHSFSTILLPRHFKHSNFSSFIRQLNTYGFRKIEAERWEFANEEFLLGQRQLLKNIKRRNPFTPSSSPSHDACNELRREKQVLMMEIVSLRQQQQTTKSYIKAMEQRIEGTERKQRQMMSFLARAMQSPSFLHQLLKQRDKKIKELEDNESAKRKRGSSSMSELEVLALEMQGHGKQRNMLEEEDHQLVVERELDDGFWEELLSDESLASTS	FLTKTFEMVDDPNTDHIVSWNRGGTSFVVWDLHSFSTILLPRHFKHSNFSSFIRQLNTYGFRKIEAERWEFANEEFLLGQRQLLKNIKRRN	PFLTKTFEMVDDPNTDHIVSWNRGGTSFVVWDLHSFSTILLPRHFKHSNFSSFIRQLNTYGFRKIEAERWEFANEEFLLGQRQLLKNIKRRNPFT	272
AthHSF-A7b	Arabidopsis thaliana	AT3G63350	MDPSSSSRARSMPPPVPMEGLQEAGPSPFLTKTFEMVGDPNTNHIVSWNRGGISFVVWDPHSFSATILPLYFKHNNFSSFVRQLNTYGFRKIEAERWEFMNEGFLMGQRDLLKSIKRRTSSSSPPSLNYSQSQPEAHDPGVELPQLREERHVLMMEISTLRQEEQRARGYVQAMEQRINGAEKKQRHMMSFLRRAVENPSLLQQIFEQKRDREEAAMIDQAGLIKMEEVEHLSELEALALEMQGYGRQRTDGVERELDDGFWEELLMNNENSDEEEANVKQD	FLTKTFEMVGDPNTNHIVSWNRGGISFVVWDPHSFSATILPLYFKHNNFSSFVRQLNTYGFRKIEAERWEFMNEGFLMGQRDLLKSIKRRTSS	PFLTKTFEMVGDPNTNHIVSWNRGGISFVVWDPHSFSATILPLYFKHNNFSSFVRQLNTYGFRKIEAERWEFMNEGFLMGQRDLLKSIKRRTSSS	282
AthHSF-A8	Arabidopsis thaliana	AT1G67970	MVKSTDGGGGSSSSSSVAPFLRKCYDMVDDSTTDSIISWSPSADNSFVILDTTVFSVQLLPKYFKHSNFSSFIRQLNIYGFRKVDADRWEFANDGFVRGQKDLLKNVIRRKNVQSSEQSKHESTSTTYAQEKSGLWKEVDILKGDKQVLAQELIKVRQYQEVTDTKMLHLEDRVQGMEESQQEMLSFLVMVMKNPSLLVQLLQPKEKNTWRKAGEGAKIVEEVTDEGESNSYGLPLVTYQPPSDNNGTAKSNSNDVNDFLRNADMLKFCLDENHVPLIIPDLYDDGAWEKLLLLSPSRKKTKKQENIVKKGKDDLTLEEEEEDGTMELDKSYMLKLISEEMEKPDDFEFGQLTPERSRNLEILTEQMELLASNE	FLRKCYDMVDDSTTDSIISWSPSADNSFVILDTTVFSVQLLPKYFKHSNFSSFIRQLNIYGFRKVDADRWEFANDGFVRGQKDLLKNVIRRKN	PFLRKCYDMVDDSTTDSIISWSPSADNSFVILDTTVFSVQLLPKYFKHSNFSSFIRQLNIYGFRKVDADRWEFANDGFVRGQKDLLKNVIRRKNVQ	374
AthHSF-A9	Arabidopsis thaliana	AT5G54070	MTAIPNVVDIESSSSSLCQETATETVTVERGSSDSSSKPDDVVLLIKEEEDDAVNLSLGFWKLHEIGLITPFLRKTFEIVDDKVTDPVVSWSPTRKSFIIWDSYEFSENLLPKYFKHKNFSSFIRQLNSYGFKKVDSDRWEFANEGFQGGKKHLLKNIKRRSKNTKCCNKEASTTTTETEVESLKEEQSPMRLEMLKLKQQQEESQHQMVTVQEKIHGVDTEQQHMLSFFAKLAKDQRFVERLVKKRKMKIQRELEAAEFVKKLKLLQDQETQKNLLDVEREFMAMAATEHNPEPDILVNNQSGNTRCQLNSEDLLVDGGSMDVNGRIEIE	FLRKTFEIVDDKVTDPVVSWSPTRKSFIIWDSYEFSENLLPKYFKHKNFSSFIRQLNSYGFKKVDSDRWEFANEGFQGGKKHLLKNIKRRSKN	PFLRKTFEIVDDKVTDPVVSWSPTRKSFIIWDSYEFSENLLPKYFKHKNFSSFIRQLNSYGFKKVDSDRWEFANEGFQGGKKHLLKNIKRRSKNT	331
AthHSF-B1	Arabidopsis thaliana	AT4G36990	MTAVTAAQRSVPAPFLSKTYQLVDDHSTDDVVSWNEEGTAFVVWKTAEFAKDLLPQYFKHNNFSSFIRQLNTYGFRKTVPDKWEFANDYFRRGGEDLLTDIRRRKSVIASTAGKCVVVGSPSESNSGGGDDHGSSSTSSPGSSKNPGSVENMVADLSGENEKLKRENNNLSSELAAAKKQRDELVTFLTGHLKVRPEQIDKMIKGGKFKPVESDEESECEGCDGGGGAEEGVGEGLKLFGVWLKGERKKRDRDEKNYVVSGSRMTEIKNVDFHAPLWKSSKVCN	FLSKTYQLVDDHSTDDVVSWNEEGTAFVVWKTAEFAKDLLPQYFKHNNFSSFIRQLNTYGFRKTVPDKWEFANDYFRRGGEDLLTDIRRRKS	PFLSKTYQLVDDHSTDDVVSWNEEGTAFVVWKTAEFAKDLLPQYFKHNNFSSFIRQLNTYGFRKTVPDKWEFANDYFRRGGEDLLTDIRRRKSV	284
AthHSF-B2a	Arabidopsis thaliana	AT5G62020	MNSPPVDAMITGESSSQRSIPTPFLTKTFNLVEDSSIDDVISWNEDGSSFIVWNPTDFAKDLLPKHFKHNNFSSFVRQLNTYGFKKVVPDRWEFSNDFFKRGEKRLLREIQRRKITTTHQTVVAPSSEQRNQTMVVSPSNSGEDNNNNQVMSSSPSSWYCHQTKTTGNGGLSVELLEENEKLRSQNIQLNRELTQMKSICDNIYSLMSNYVGSQPTDRSYSPGGSSSQPMEFLPAKRFSEMEIEEEEEASPRLFGVPIGLKRTRSEGVQVKTTAVVGENSDEETPWLRHYNRTNQRVCN	FLTKTFNLVEDSSIDDVISWNEDGSSFIVWNPTDFAKDLLPKHFKHNNFSSFVRQLNTYGFKKVVPDRWEFSNDFFKRGEKRLLREIQRRKI	PFLTKTFNLVEDSSIDDVISWNEDGSSFIVWNPTDFAKDLLPKHFKHNNFSSFVRQLNTYGFKKVVPDRWEFSNDFFKRGEKRLLREIQRRKITT	299
AthHSF-B2b	Arabidopsis thaliana	AT4G11660	MPGEQTGETPTVAGVGGGGAGCSAGNSGGSSGCGAGGGGGGSGGGGGGGGDSQRSIPTPFLTKTYQLVEDPVYDELISWNEDGTTFIVWRPAEFARDLLPKYFKHNNFSSFVRQLNTYGFRKVVPDRWEFSNDCFKRGEKILLRDIQRRKISQPAMAAAAAAAAAAVAASAVTVAAVPVVAHIVSPSNSGEEQVISSNSSPAAAAAAIGGVVGGGSLQRTTSCTTAPELVEENERLRKDNERLRKEMTKLKGLYANIYTLMANFTPGQEDCAHLLPEGKPLDLLPERQEMSEAIMASEIETGIGLKLGEDLTPRLFGVSIGVKRARREEELGAAEEEDDDRREAAAQEGEQSSDVKAEPMEENNSGNHNGSWLELGK	FLTKTYQLVEDPVYDELISWNEDGTTFIVWRPAEFARDLLPKYFKHNNFSSFVRQLNTYGFRKVVPDRWEFSNDCFKRGEKILLRDIQRRKIS	PFLTKTYQLVEDPVYDELISWNEDGTTFIVWRPAEFARDLLPKYFKHNNFSSFVRQLNTYGFRKVVPDRWEFSNDCFKRGEKILLRDIQRRKISQ	377
AthHSF-B3	Arabidopsis thaliana	AT2G41690	MEDAGEHLRCNDNVNDEERLPLEFMIGNSTSTAELQPPPPFLVKTYKVVEDPTTDGVISWNEYGTGFVVWQPAEFARDLLPTLFKHCNFSSFVRQLNTYGFRKVTTIRWEFSNEMFRKGQRELMSNIRRRKSQHWSHNKSNHQVVPTTTMVNQEGHQRIGIDHHHEDQQSSATSSSFVYTALLDENKCLKNENELLSCELGKTKKKCKQLMELVERYRGEDEDATDESDDEEDEGLKLFGVKLE	FLVKTYKVVEDPTTDGVISWNEYGTGFVVWQPAEFARDLLPTLFKHCNFSSFVRQLNTYGFRKVTTIRWEFSNEMFRKGQRELMSNIRRRKSQ	PFLVKTYKVVEDPTTDGVISWNEYGTGFVVWQPAEFARDLLPTLFKHCNFSSFVRQLNTYGFRKVTTIRWEFSNEMFRKGQRELMSNIRRRKSQH	244
AthHSF-B4	Arabidopsis thaliana	AT1G46264	MAMMVENSYGGYGGGGGERIQLMVEGQGKAVPAPFLTKTYQLVDDPATDHVVSWGDDDTTFVVWRPPEFARDLLPNYFKHNNFSSFVRQLNTYGFRKIVPDRWEFANEFFKRGEKHLLCEIHRRKTSQMIPQQHSPFMSHHHAPPQIPFSGGSFFPLPPPRVTTPEEDHYWCDDSPPSRPRVIPQQIDTAAQVTALSEDNERLRRSNTVLMSELAHMKKLYNDIIYFVQNHVKPVAPSNNSSYLSSFLQKQQQQQPPTLDYYNTATVNATNLNALNSSPPTSQSSITVLEDDHTNHHDQSNMRKTKLFGVSLPSSKKRSHHFSDQTSKTRLVLDQSDLALNLMTASTR	FLTKTYQLVDDPATDHVVSWGDDDTTFVVWRPPEFARDLLPNYFKHNNFSSFVRQLNTYGFRKIVPDRWEFANEFFKRGEKHLLCEIHRRKTS	PFLTKTYQLVDDPATDHVVSWGDDDTTFVVWRPPEFARDLLPNYFKHNNFSSFVRQLNTYGFRKIVPDRWEFANEFFKRGEKHLLCEIHRRKTSQ	348
AthHSF-C1	Arabidopsis thaliana	AT3G24520	MEDDNSNNNNNNNVIAPFIVKTYQMVNDPSTDWLITWGPAHNSFIVVDPLDFSQRILPAYFKHNNFSSFVRQLNTYGFRKVDPDRWEFANEHFLRGQKHLLNNIARRKHARGMYGQDLEDGEIVREIERLKEEQRELEAEIQRMNRRIEATEKRPEQMMAFLYKVVEDPDLLPRMMLEKERTKQQQQVSDKKKRRVTMSTVKSEEEEVEEDEGRVFRVMSSSTPSPSSTENLYRNHSPDGWIVPMTQGQFGSYETGLVAKSMLSNSTSSTSSSLTSTFSLPESVNGGGGGGCGSIQGERRYKETATFGGVVESNPPTTPPYPFSLFRGGF	FIVKTYQMVNDPSTDWLITWGPAHNSFIVVDPLDFSQRILPAYFKHNNFSSFVRQLNTYGFRKVDPDRWEFANEHFLRGQKHLLNNIARRKHA	PFIVKTYQMVNDPSTDWLITWGPAHNSFIVVDPLDFSQRILPAYFKHNNFSSFVRQLNTYGFRKVDPDRWEFANEHFLRGQKHLLNNIARRKHAR	330
VviHSF-01	Vitis vinifera	GSVIVT01022134001	MAQRSVPAPFLTKTYQLVDDPSTDDVISWSESGNTFVVWKTADFAKDLLPNYFKHNNFSSFVRQLNTYGFRKIVPDKWEFANEYFKRGQRELMSEIRRRKTTTSSTAQALPGGKSAGGGTSSPTNSGEDLGSTSTSSPDSKNPGSVETTTTAQFADLSDENEKLKKDNESLSTELAQTKRQCEELIAFLTEYVKVAPDQINRIMKQESCGSGHGGLVGEIGGSVDDDDDDEKDEDPNEESLKLFGVWLKGKKKRGREEKMGYGGPHQKEMKTVDFEAPWMTSKVCN	FLTKTYQLVDDPSTDDVISWSESGNTFVVWKTADFAKDLLPNYFKHNNFSSFVRQLNTYGFRKIVPDKWEFANEYFKRGQRELMSEIRRRKTT	PFLTKTYQLVDDPSTDDVISWSESGNTFVVWKTADFAKDLLPNYFKHNNFSSFVRQLNTYGFRKIVPDKWEFANEYFKRGQRELMSEIRRRKTTT	286	291.944
VviHSF-02	Vitis vinifera	GSVIVT01019829001	MAPLPVEQTGESLAGESQRSLPTPFLTKTYQLVDDPAVDDLISWNEDGSTFIVWRPAEFARDLLPKYFKHNNFSSFVRQLNTYGFRKVVPDRWEFANDYFRKGEKALLRDIQRRKISPMAAAAATTVTVAAVLPVVARAVSPTNSGDEQVLSSNSSPATILEENERLRRENSQLTQELTQLRGLCNNILALMTNYAAGQIDAGGIPEGRPLDLLTERQLPVEAGQSGVKAEGDLSPRLFGVSIGVKRVRRDEEEESEKEAQTQQQEVKSEPLDGSSDHHQDPPWLELRNDPVERGHDSGLIPRLIW	FLTKTYQLVDDPAVDDLISWNEDGSTFIVWRPAEFARDLLPKYFKHNNFSSFVRQLNTYGFRKVVPDRWEFANDYFRKGEKALLRDIQRRKI	PFLTKTYQLVDDPAVDDLISWNEDGSTFIVWRPAEFARDLLPKYFKHNNFSSFVRQLNTYGFRKVVPDRWEFANDYFRKGEKALLRDIQRRKISP	306
VviHSF-03	Vitis vinifera	GSVIVT01009477001	MALMLDNCEGILLSLDSHKSVPAPFLTKTYQLVDDPATDHIVSWGEDDTTFVVWRPPEFARDLLPNYFKHNNFSSFVRQLNTYGFRKIVPDRWEFANEFFKKGEKHLLCEIHRRKTSQPQVPMNHHHHHHSPLGDNERLRRSNSILMSELAHMRKLYNDIIYFVQNHVKPVAPSNSYPSSLVICNPPSSATTAAATITCSSTAMVQKPLNHTTTSSKSSLTVLEETNGSSCRTKLFGVPLQSKKRLHPEYASTTTSMETNKARLVLDKDDLGLNLMPPSPC	FLTKTYQLVDDPATDHIVSWGEDDTTFVVWRPPEFARDLLPNYFKHNNFSSFVRQLNTYGFRKIVPDRWEFANEFFKKGEKHLLCEIHRRKTS	PFLTKTYQLVDDPATDHIVSWGEDDTTFVVWRPPEFARDLLPNYFKHNNFSSFVRQLNTYGFRKIVPDRWEFANEFFKKGEKHLLCEIHRRKTSQ	281
VviHSF-04	Vitis vinifera	GSVIVT01037333001	MAFTVDKCEEMVFSVESQKAVPAPFLTKTYQLVDDPHTDHIVSWGEDETTFVVWRPPEFARDLLPNYFKHNNFSSFVRQLNTYGFKKIVADRWEFANEYFRKGGKHMLSEIHRRKTPHHHHQPYHDHHQPPQFLQPELENSVWIDSPLPSPTASSDVLTALTQDNHRLRRKNFMLLSELAHMKTLYNDIIFFIQNHVKPVAPYDQRPKSNAAPKLIELDSSLQSPNVSGMQTPKHRYSAGNCSMSTLTDDQQTNNGSFKLFGVPLSGKKRLHPEKFDPEELQCPY	FLTKTYQLVDDPHTDHIVSWGEDETTFVVWRPPEFARDLLPNYFKHNNFSSFVRQLNTYGFKKIVADRWEFANEYFRKGGKHMLSEIHRRKT	PFLTKTYQLVDDPHTDHIVSWGEDETTFVVWRPPEFARDLLPNYFKHNNFSSFVRQLNTYGFKKIVADRWEFANEYFRKGGKHMLSEIHRRKTPH	285
VviHSF-05	Vitis vinifera	GSVIVT01018041001	MEGLHDIGPPPFLNKTYDLVDDPSTDSIVSWSIGNNSFVVWDPQIFAGNLLPRYFKHNNFSSFVRQLNTYGFRKVDPDRWEFANEEFLRGQKPLLKKIKRKKALQPYTSQQAVAQKATTGYKSLPPSNGAKDQRDRVETETDDEFLGKSYKESQYHTEIGPTKQNKRT	FLNKTYDLVDDPSTDSIVSWSIGNNSFVVWDPQIFAGNLLPRYFKHNNFSSFVRQLNTYGFRKVDPDRWEFANEEFLRGQKPLLKKIKRKKA	PFLNKTYDLVDDPSTDSIVSWSIGNNSFVVWDPQIFAGNLLPRYFKHNNFSSFVRQLNTYGFRKVDPDRWEFANEEFLRGQKPLLKKIKRKKALQ	168
VviHSF-06	Vitis vinifera	GSVIVT01015389001	MEAPNNNIIAPFVMKTYQMVNDSSTDALITWGRANNSFIVFDPLDFSQRILPAYFKHNNFSSFVRQLNTYGFRKVDPDRWEFANEWFLRGQRQLLKNIVRKKHSSCGRSSFLLQAKLEDGDEEILAEIERLKHEQKSLEEELEGMTKRLEATERRPQQMMAFLYKVVEDPELIPTMMMEKERRRQLGEKKRRLLIQSTSSSSGTAGTASVKSEEEEDGSTVGIISSPETLSHSSPSPDTSTPAWVRPRQMMGWPLVAQQPYPLAAIPSPIYSGSVTGIGHFNTMSPPPENTISSYKSSDSGQLSYFTEMEDGVETRPLPYPFSLLEGGF	FVMKTYQMVNDSSTDALITWGRANNSFIVFDPLDFSQRILPAYFKHNNFSSFVRQLNTYGFRKVDPDRWEFANEWFLRGQRQLLKNIVRKKHS	PFVMKTYQMVNDSSTDALITWGRANNSFIVFDPLDFSQRILPAYFKHNNFSSFVRQLNTYGFRKVDPDRWEFANEWFLRGQRQLLKNIVRKKHSS	329
VviHSF-07	Vitis vinifera	GSVIVT01011632001	MVKSTEAGSVVPPFLKKCYEMVDDEASDAIISWNLSNDSFVIRDTTEFSHQLLPKYFKHNNFSSFMRQLNIYGFRKIDTDHWEFANEGFIRGQKHLLKNIRRRKQLQGQDKQKSSHQRDKSAGACEEIEASKLWNDVEILKTDRNALTQQLVKLRQHQETAESKLLVLRERLQGMEKNQQQMLSFLVMAMQSPEFLVQFMQPKEKNWRMAEVGKNMLERRAENGEPAASDVMIVRYQPPMDETPKPLPIPTSNSEKSLDQIRRNPWNLIFS	FLKKCYEMVDDEASDAIISWNLSNDSFVIRDTTEFSHQLLPKYFKHNNFSSFMRQLNIYGFRKIDTDHWEFANEGFIRGQKHLLKNIRRRKQ	PFLKKCYEMVDDEASDAIISWNLSNDSFVIRDTTEFSHQLLPKYFKHNNFSSFMRQLNIYGFRKIDTDHWEFANEGFIRGQKHLLKNIRRRKQLQ	271
VviHSF-08	Vitis vinifera	GSVIVT01021269001	MDESPGSSNSPPPFLTKTYEMVDDPTTDSIVSWSQTNKSFIVWNPEDFSRDLLPRFFKHNNFSSFIRQLNTYGFRKIDSEQWAFANEDFIRGQPHLLRNIHRRKPVHSHSIQNQKGQGTSCPLSESDREGYRADIERLKHDKGALLLELQRHKEDRQGLELQMQHLKDRLQHMEQRQQTVISYLARMLQKPGLALSFLPSMETHNRKRRLLTSNCFYDESDVEENRIATSHTVNTEKLDATSVLELVEFLESSLSSWEDILDEFRPTSGTLIHPWKQVVGAASPVPTGVNDVFWEQFFTENPDSSAEEVQLERKDDESRKNEGKHGDHGRFWWNARSANKLADQMGQLTPAERT	FLTKTYEMVDDPTTDSIVSWSQTNKSFIVWNPEDFSRDLLPRFFKHNNFSSFIRQLNTYGFRKIDSEQWAFANEDFIRGQPHLLRNIHRRKP	PFLTKTYEMVDDPTTDSIVSWSQTNKSFIVWNPEDFSRDLLPRFFKHNNFSSFIRQLNTYGFRKIDSEQWAFANEDFIRGQPHLLRNIHRRKPVH	354
VviHSF-09	Vitis vinifera	GSVIVT01010595001	MSRPPVEQSGGESQKSLPTPFLTKTYQLVEDRTVDDVISWNEDGSAFVVWNTAVLARDLLPKYFKHNNFSSFVRQLNTYGFRKVVPDRWEFSNDCFRRGEKRLLCDIQRRRISSTAPISPVSSSNCADERLISSNSPPATTTTPHATSNTAGLIDENERLRKENVELNRELNRMKTLCNNIFALISSNYTNNIFGNVSQTDKPLNRFPEKQFSSEMMIEEEMTPRLFGVAIGAKRAREGEGGFGGRPGSGTGTPTALVGAKPELMPSSFSNHKKKCRVFFACISPLHSFFLYFISF	FLTKTYQLVEDRTVDDVISWNEDGSAFVVWNTAVLARDLLPKYFKHNNFSSFVRQLNTYGFRKVVPDRWEFSNDCFRRGEKRLLCDIQRRR	PFLTKTYQLVEDRTVDDVISWNEDGSAFVVWNTAVLARDLLPKYFKHNNFSSFVRQLNTYGFRKVVPDRWEFSNDCFRRGEKRLLCDIQRRRISS	296
VviHSF-10	Vitis vinifera	GSVIVT01033257001	MEGDHCEKGLLEYVRKSTPPPFLLKTYMLVEDPATDGVISWNSDGTAFVVWQPAEFARDLLPTLFKHSNFSSFVRQLNTYGFRKVATSRWEFCNDMFRRGERELLCEIRRRKAWTKQQQQQQQQQQAPGG	FLLKTYMLVEDPATDGVISWNSDGTAFVVWQPAEFARDLLPTLFKHSNFSSFVRQLNTYGFRKVATSRWEFCNDMFRRGERELLCEIRRRKA	PFLLKTYMLVEDPATDGVISWNSDGTAFVVWQPAEFARDLLPTLFKHSNFSSFVRQLNTYGFRKVATSRWEFCNDMFRRGERELLCEIRRRKAWTKQQQQQQQQQ	130
VviHSF-11	Vitis vinifera	GSVIVT01003118001	MECHHQLHNGFNYLPNEESFVWSKRIIQTLTFSLHLILNLTFTLSKFFEIFLKYSSPQSGEPPVVPQPVEGLHDAGPPPFLTKTFDIVDDPASDHVVSWSRAGSSFVVWDPHAFSTNLLPKNFKHNNFSSFVRQLNTYGFRKIDPDRWEFANEGFIRGQRHLLKNIRRRKTPSQAPPPHQALDPFDRLQRDKHVLMMELVKLRQQQQNTRITLQAMEQRLQGTEIKQQQMMNFLARAMQNPAFIQQLVQQKERRKEIVEAISKKRRRPIDQGTRNGFEVSELEALAFEMQGLGRPRKELEDHEELDPPESEDKELDEGFWEELLNERFGCPSSLPGAEGEEEEEDVNVLAGRFGYLGSSPQ	FLTKTFDIVDDPASDHVVSWSRAGSSFVVWDPHAFSTNLLPKNFKHNNFSSFVRQLNTYGFRKIDPDRWEFANEGFIRGQRHLLKNIRRRKT	PFLTKTFDIVDDPASDHVVSWSRAGSSFVVWDPHAFSTNLLPKNFKHNNFSSFVRQLNTYGFRKIDPDRWEFANEGFIRGQRHLLKNIRRRKTPS	361
VviHSF-12	Vitis vinifera	GSVIVT01015183001	MEPASLISNLQQVLITKREDGNSISSCSSTVDESAVKDCSRAVVLVTNGDGIESPGLTSLVQALLREPRFHVHVCAPQSDKSVSGHSMTVQETLTACSAEIGGATAYEVSGTPADCVSLALSGALFSWSKPVLVICGINKGSSYGLNMFHSGAVAGAREALLCGVPALCISMNWKEDVSCDNDFKDAVNVCLPIIHAAIRDIEKGIFPKSCLVNIEIPSSPLKNKGFKVARQSLRRPALIWQAVSATKHPSIGHFMSNQQSLGFKLAQLGRDASAMGAARCLNSDQKNQEIESVGVAGKLSSQKTVKKYFRLKFQEMEQGKADEDLDFKAVENGFVKDEEEEERKKEMESVEVKEESMWVEVEDSGELWGSSVAAKEEKMLEADGGGESGWCCSSLAAA…	FLKKTFEMVEDPETDSVVSWSVARNSFIVWDSHNFSQSLLPKYFKHSNFSSFIRQLNTYGFRKIDSDRWEFANEAFQGGKRHLLKNIKRRR	PFLKKTFEMVEDPETDSVVSWSVARNSFIVWDSHNFSQSLLPKYFKHSNFSSFIRQLNTYGFRKIDSDRWEFANEAFQGGKRHLLKNIKRRRHG	663
VviHSF-13	Vitis vinifera	GSVIVT01024378001	MVDDRATDSVVSWSSGNNSFVVWNVPEFSRDLLPKYFKHNNFSSFVRQLNTYGFRKVDPDRWEFANEGFLRGQKHLLKSISRRKSTHCKAHREHVLR	MVDDRATDSVVSWSSGNNSFVVWNVPEFSRDLLPKYFKHNNFSSFVRQLNTYGFRKVDPDRWEFANEGFLRGQKHLLKSISRRKST	MVDDRATDSVVSWSSGNNSFVVWNVPEFSRDLLPKYFKHNNFSSFVRQLNTYGFRKVDPDRWEFANEGFLRGQKHLLKSISRRKSTH	97
VviHSF-14	Vitis vinifera	GSVIVT01033781001	MNPRDNPYLDRKESPPPPYQSEAPAAEAVQPKTEPFSVGSQPFPSGSPLLQIRPISSLEPPFSGEPIVTVGVAAEAEAEAEEIGAPQPLDCLQDNPIPPFLSKTFDIVDDVLLDPIVSWGPTGESFVVWDPVEFSRLVLPRNFKHNNFSSFVRQLNTYGFRKIDSDKWEFANEGFMRGKRHLLKNIRRRKSPQSQHTGSYAGPSSEIAMSGLESEVERLRKQKSLLMQEVIELQQQHSGTIHQMEVVNERIQAAEKRQKKMVSFLAKLLQNPEFLARLLPKDDQKDIGVPRMMRKFVKHQKLEPGKSDSSMGGQIVKYRPGSENLITSSLFPPSNPDSSHKLIEAPEQVREETASLGPVGLVFKGKNLVSSQPEGSTNYNLSFIDDSTKEKAFPEFLSP…	FLSKTFDIVDDVLLDPIVSWGPTGESFVVWDPVEFSRLVLPRNFKHNNFSSFVRQLNTYGFRKIDSDKWEFANEGFMRGKRHLLKNIRRRKS	PFLSKTFDIVDDVLLDPIVSWGPTGESFVVWDPVEFSRLVLPRNFKHNNFSSFVRQLNTYGFRKIDSDKWEFANEGFMRGKRHLLKNIRRRKSPQ	493
VviHSF-15	Vitis vinifera	GSVIVT01002066001	MAEELRHSPGGKSGTRTKSPAPFLLKTYDLLEGVIDTSNGDGGQRIVSWNADGTGFVVWSPDEFSEIMLPRYFKHNNFSSFVRQLNTYGFKKIASKRWEFQHDKFQRGCRDMLAEITRKKCEPSIFPPFLKASKDNTASSADQKSNCLSLMEENESLRRQNLDLQMQISQLKALEMKLMDCLNVSIHGHHHPHNKLRRLF	FLLKTYDLLEGVIDTSNGDGGQRIVSWNADGTGFVVWSPDEFSEIMLPRYFKHNNFSSFVRQLNTYGFKKIASKRWEFQHDKFQRGCRDMLAEITRKKC	PFLLKTYDLLEGVIDTSNGDGGQRIVSWNADGTGFVVWSPDEFSEIMLPRYFKHNNFSSFVRQLNTYGFKKIASKRWEFQHDKFQRGCRDMLAEITRKKCEP	200
VviHSF-16	Vitis vinifera	GSVIVT01020781001	MVDDPITDSIVSWSQAGHSFVVWNPPEFAKDLLPKYFKHNNFSSFVRQLNTYGFRKADPEQWEFANEEFIRGQRHLLKNIHRRKPIHSHSTQNQVGSAPLPESEKQEFEAEIERLKHDKGALLSELQRYKQENQFFEFQTQSLGKRVFNMELRQRKMMAYLAQVLQKPGFTSSLMAQSEIHNKKRRLLMPNYLFNEANNVEMIESLESSLNFWENFLYGIGQGSADLARATNHADSPAISSIYLNIDGCPKSLRIDVNSEPTNASEVEASKECEGGTTAAGANDVFWAQFLTETPGSSDAQEVQSERRDAYGGKGDSKPDDHRKYWWDTNNLDHLTKKMGHLTSSERT	MVDDPITDSIVSWSQAGHSFVVWNPPEFAKDLLPKYFKHNNFSSFVRQLNTYGFRKADPEQWEFANEEFIRGQRHLLKNIHRRK	MVDDPITDSIVSWSQAGHSFVVWNPPEFAKDLLPKYFKHNNFSSFVRQLNTYGFRKADPEQWEFANEEFIRGQRHLLKNIHRRKPIH	348
VviHSF-17	Vitis vinifera	GSVIVT01021040001	MDGGPAGGGGVGGGATGPAPFLLKTYEMVDDSSTDEIVSWSSTKSSFVVWNPPEFARVLLPMYFKHNNFSSFIRQLNTYMATELLKVKXXXXXXXXXXXXXXXXXXXXXXXXXXXXXXXXXXXXXXXXXXXXXXXXXXXXXXXXXXXXXXXXXXXXXXXXXXXXXXXXXXXXXXXXXXXXXXXXXXXXXXXXXXXXXXXXXXXXXXXXXXXXXXXXXXXXXXXXXXXXXXXXXXXXXXXXXXXXXXXXXXXXXXXXXXXXXXXXXXXXXXXXXXXXXXXXXXXXXXXXXXXXXXXXXXXXXXXXXXXXXXXXXXXXXXXXXXXXXXXXXXXXXXXXXXXXXXXXXXXXXXXXXXXXXXXXXXXXXXXXXXXXXXXXXXXXXXXXXXXXXXXXXXXXXXX…	FLLKTYEMVDDSSTDEIVSWSSTKSSFVVWNPPEFARVLLPMYFKHNNFSSFIRQLNTY	PFLLKTYEMVDDSSTDEIVSWSSTKSSFVVWNPPEFARVLLPMYFKHNNFSSFIRQLNTYMATELLKVKXXX	-*
VviHSF-18	Vitis vinifera	GSVIVT01035385001	MGSSSSSSSSPGFAPHPLEARNSFIVWDSHKFSTTLLPRYFKHSNFSSFIRQLNTYGFRKVDPDRWEFANEGFLGGQKHLLKNIKRRRHVSQNTQQGGLGACVELGQYGLEDELERLKRDRNVLMAEIGKLRQQQQNSRNELVAMEGRMQNTEKKQMQMMTFLAKALNNPSFVQQFIQQRRELRGAEIGRKRRLTTSQSAENLQEVITDPKADSIDNNLGSVNDVIWEELLSDDLIAGNEEEVPPLRLGDHHEPETDVEVEDLVATPSDWGEDFQDLVDQMAFLRPNLRSRLERRVLNL	ARNSFIVWDSHKFSTTLLPRYFKHSNFSSFIRQLNTYGFRKVDPDRWEFANEGFLGGQKHLLKNIKRRRH	PLEARNSFIVWDSHKFSTTLLPRYFKHSNFSSFIRQLNTYGFRKVDPDRWEFANEGFLGGQKHLLKNIKRRRHVS	299
VviHSF-19	Vitis vinifera	GSVIVT01013107001	MVDDPATNSIVSWSPTNNSFVVWNPPEFARDLLPKYFKHNNFSSFVRQLNTYHPKTEVGMEKQKEKKARFRDSGRLIQTVGNLQMRDF	MVDDPATNSIVSWSPTNNSFVVWNPPEFARDLLPKYFKHNNFSSFVRQLNTYHPKTEVGMEKQKEKKA	MVDDPATNSIVSWSPTNNSFVVWNPPEFARDLLPKYFKHNNFSSFVRQLNTYHPKTEVGMEKQKEKKARFRDSGRLIQTVGNLQM	88
OsaHSF-01	Oryza sativa	LOC_Os03g58160.1	MNYRVVNPVKVESGPSTGVANGQPPRPMDGLADGGPPPFLTKTYDMVDDPTTDAVVSWSATNNSFVVWDPHLFGNVLLPRYFKHNNFSSFVRQLNTYGFRKVDPDKWEFANEGFLRGQKHLLKSIKRRKPPNSSPSQQSLGSFLEVGHFGYEGEIDQLKRDKHLLMAEVVKLRQEQQNTKSDLQAMEQKLQGTEQKQQHMMAFLSRVMHNPEFIRQLFSQSEMRKELEEFVSKKRRRRIDQGPELDSMGTGSSPEQVSQVMFEPHDPVDSLFNGVPSDLESSSVEANGGKAQQDVASSSSEHGKIKPSNGELNEDFWEDLLHEGGLDEDTRNPAIDDMNLLSQKMGYLNSSSTKSPQ	FLTKTYDMVDDPTTDAVVSWSATNNSFVVWDPHLFGNVLLPRYFKHNNFSSFVRQLNTYGFRKVDPDKWEFANEGFLRGQKHLLKSIKRRKP	PFLTKTYDMVDDPTTDAVVSWSATNNSFVVWDPHLFGNVLLPRYFKHNNFSSFVRQLNTYGFRKVDPDKWEFANEGFLRGQKHLLKSIKRRKPPN	357	384.12
OsaHSF-02	Oryza sativa	LOC_Os03g63750.1	MEAAVAAAAAAAGAVTTAVAPPPGAAVSNGVATAPPPFLMKTYEMVDDPATDAVVSWGPGNNSFVVWNTPEFARDLLPKYFKHSNFSSFVRQLNTYGFRKVDPDRWEFANEGFLRGQKHLLKTINRRKPTHGNNQVQQPQLPAAPVPACVEVGKFGMEEEIEMLKRDKNVLMQELVRLRQQQQTTDHQLQTLGKRLQGMEQRQQQMMSFLAKAMHSPGFLAQFVQQNENSRRRIVASNKKRRLPKQDGSLDSESASLDGQIVKYQPMINEAAKAMLRKILKLDSSHRFESMGNSDNFLLENYMPNGQGLDSSSSTRNSGVTLAEVPANSGLPYVATSSGLSAICSTSTPQIQCPVVLDNGIPKEVPNMSAVPSVPKAVAPGPTDINILEFPDLQDIVAE…	FLMKTYEMVDDPATDAVVSWGPGNNSFVVWNTPEFARDLLPKYFKHSNFSSFVRQLNTYGFRKVDPDRWEFANEGFLRGQKHLLKTINRRKP	PFLMKTYEMVDDPATDAVVSWGPGNNSFVVWNTPEFARDLLPKYFKHSNFSSFVRQLNTYGFRKVDPDRWEFANEGFLRGQKHLLKTINRRKPTH	506
OsaHSF-03	Oryza sativa	LOC_Os04g48030.1	MASPAAGTPPFLTKTYAMVEDPSTDETISWNDSGTAFVVWRPAEFARDLLPKHFKHSNFSSFVRQLNTYGFKKVVADRWEFANDCFRRGEKHLLGGIQRRKGSGTGGAGAAPAGGIPTAIPISSPPTSSGGEPAVSSSPPRGAAGIAAGVSGAVAELEEENARLRRENARLARELARARRVCDGVRRLVSRYDHDHGGGEEEAGEGDVKPMLFGVAIGGKRSREENGEDEEEEEEEGADEDGEDDEVEEDDEERERHAARRVPVREGKVRRTTELSDLDVLALSVRAAAAARPGGASRDRKSSVS	FLTKTYAMVEDPSTDETISWNDSGTAFVVWRPAEFARDLLPKHFKHSNFSSFVRQLNTYGFKKVVADRWEFANDCFRRGEKHLLGGIQRRKG	PFLTKTYAMVEDPSTDETISWNDSGTAFVVWRPAEFARDLLPKHFKHSNFSSFVRQLNTYGFKKVVADRWEFANDCFRRGEKHLLGGIQRRKGSG	305
OsaHSF-04	Oryza sativa	LOC_Os02g32590.1	MDHNTDPPPTTMVDAAAALLLEPKLEGYDDDGGGEPLQPAPFVSPLDQLMQPPRPLEALLQGPQLPPFLSKTYDLVCEPELDGVISWGHAGNSFVVWDPSAFARDVLPHHFKHNNFSSFVRQLNTYGFRKVHADRWEFAHEDFLRHSKHLLKKIVRRRSSPTQQSGLQPGSSGESGLDPELNTLRREKSALLQEVTRLKQEHLQTIEQMSTLNQRLESAEDRQKQMVSFLAKLLQNPTFLRQLKMHRQQKEIDSTRVKRKFLKHVPHGNIDSGESSSQHTGESNLDFSPTSLDLPATHSDILDLQNFLLEDGDLNLAMLPENIGLDGIEAPDDIGALVQGFDTQEELELGSGVELLEIPPASGPRGQDPTIGRSKGKNVLSPGLDATSSEADCLGSFSD…	FLSKTYDLVCEPELDGVISWGHAGNSFVVWDPSAFARDVLPHHFKHNNFSSFVRQLNTYGFRKVHADRWEFAHEDFLRHSKHLLKKIVRRRSS	PFLSKTYDLVCEPELDGVISWGHAGNSFVVWDPSAFARDVLPHHFKHNNFSSFVRQLNTYGFRKVHADRWEFAHEDFLRHSKHLLKKIVRRRSSP	498
OsaHSF-05	Oryza sativa	LOC_Os03g25120.1	MAFLVERCGGEMVVSMERSHGRSTTTAAAVTAAPAPFLSKTYQLVDDPSTDDVVSWGEDEATFVVWRPPEFARDLLPNYFKHNNFSSFVRQLNTYGFRKIVADRWEFANEFFRKGAKHLLSEIHRRKSSSCSQPQPPPPFPMHQHYPLSLFSPPTTPRSPPVGAAAAAAYHFQEEYCSSPADYAGGGGDLLAALSEDNRQLRRRNSLLLSELAHMRKLYNDIIYFLQNHVEPVAPPPLAAATSCRLVELGPSTTERRRCAASPSGDNDDDAAVRLFGVRLDDDHGKKRRVQLVQEDEGDEQGSEG	FLSKTYQLVDDPSTDDVVSWGEDEATFVVWRPPEFARDLLPNYFKHNNFSSFVRQLNTYGFRKIVADRWEFANEFFRKGAKHLLSEIHRRKSS	PFLSKTYQLVDDPSTDDVVSWGEDEATFVVWRPPEFARDLLPNYFKHNNFSSFVRQLNTYGFRKIVADRWEFANEFFRKGAKHLLSEIHRRKSSS	305
OsaHSF-06	Oryza sativa	LOC_Os09g35790.1	MAEQGAGEADAGGGEPPPAAVMTAAAEALAGQRSLPTPFLTKTYQLVEDPAVDDVISWNEDGSTFVVWRPAEFARDLLPKYFKHNNFSSFVRQLNTYGFRKIVPDRWEFANDCFRRGEKRLLCDIHRRKVVAAAAAAPPPPSPGMATAAAAVASGAVTVAAAPIPMALPVTRAGSPAHSSEEQVLSSNSGSGEEHRQASGSGSAPGGGGGGSASGGDMGEENERLRRENARLTRELGHMKKLCNNILLLMSKYAATQHVEGSAGISSIANCSGESSEAVPPPPPLPPAILDLMPSCPALATAAAAAGLAIDGEPDPSARLFGVSIGLKRTRDDAAAAADEDGGGEDQAEHGGADVKPEAADPHPAGGGGGSSTEASPESHPWPIYRPTPMYHAVRPTCN…	FLTKTYQLVEDPAVDDVISWNEDGSTFVVWRPAEFARDLLPKYFKHNNFSSFVRQLNTYGFRKIVPDRWEFANDCFRRGEKRLLCDIHRRK	PFLTKTYQLVEDPAVDDVISWNEDGSTFVVWRPAEFARDLLPKYFKHNNFSSFVRQLNTYGFRKIVPDRWEFANDCFRRGEKRLLCDIHRRKVVA	454
OsaHSF-07	Oryza sativa	LOC_Os07g44690.1	MAFLVERCGEMVVSMEMGPHGGGGAAAGKPVPAPFLTKTYQLVDDPCTDHIVSWGEDDTTFVVWRPPEFARDLLPNYFKHNNFSSFVRQLNTYGFRKIVADRWEFANEFFRKGAKHLLAEIHRRKSSQPPPPPMPHQPYHHHHHLNPFSLPPPPPAYHHHHLIQEEPATTAHCTVAGDGGEGGDFLAALSEDNRQLRRRNSLLLSELAHMKKLYNDIIYFLQNHVAPVTTTTTTPSSTAMAAAQHHLPAAASCRLMELDSPDHSPPPPPPKTPATDGGDTVKLFGVSLHGRKKRAHRDDDDGVHDQGSEV	FLTKTYQLVDDPCTDHIVSWGEDDTTFVVWRPPEFARDLLPNYFKHNNFSSFVRQLNTYGFRKIVADRWEFANEFFRKGAKHLLAEIHRRKSS	PFLTKTYQLVDDPCTDHIVSWGEDDTTFVVWRPPEFARDLLPNYFKHNNFSSFVRQLNTYGFRKIVADRWEFANEFFRKGAKHLLAEIHRRKSSQ	310
OsaHSF-08	Oryza sativa	LOC_Os07g08140.1	MDDPMLNAVKEEESHGDGGGLEVVAGEDGAAAVAAGVAPRPMEGLHDAGPPPFLTKTYDMVDDAGTDAAVSWSATSNSFVVWDPHAFATVLLPRFFKHNNFSSFVRQLNTYGFRKVDPDRWEFANENFLRGQRHLLKNIKRRKPPSHTASNQQSLGPYLEVGHFGYDAEIDRLKRDKQLLMAEVVKLRQEQQNTKANLKAMEDRLQGTEQRQQQMMAFLARVMKNPEFLKQLMSQNEMRKELQDAISKKRRRRIDQGPEVDDVGTSSSIEQESPALFDPQESVEFLIDGIPSDLENSAMDAGGLVEPQDFDVGASEQQQIGPQGELNDNFWEELLNEGLVGEENDNPVVEDDMNVLSEKMGYLNSNGPTAGE	FLTKTYDMVDDAGTDAAVSWSATSNSFVVWDPHAFATVLLPRFFKHNNFSSFVRQLNTYGFRKVDPDRWEFANENFLRGQRHLLKNIKRRKP	PFLTKTYDMVDDAGTDAAVSWSATSNSFVVWDPHAFATVLLPRFFKHNNFSSFVRQLNTYGFRKVDPDRWEFANENFLRGQRHLLKNIKRRKPPS	372
OsaHSF-09	Oryza sativa	LOC_Os09g28200.1	MERCGSWSDCEAAAAAAQKAVPAPFLTKTYQLVDDPATDHIVSWGDDRVSTFVVWRPPEFARDILPNYFKHNNFSSFVRQLNTYGFRKVVPERWEFANEFFRKGEKQLLTEIHRRKTSSASTASPSPPPFFAPPHFPLFHHPGVAAAQHHHAFVGDDGVVAAHGIGMPFPQPHWREPNLPVATRLLALGGPAPSPSSAEAGGAGRAATAAVLMEENERLRRSNTALLQELAHMRKLYNDIIYFVQNHVRPVAPSPAAAAFLQGLGMQARKKPAAANVLNNSGGSTTSSSSLTIAEEPSPPPQQQHLAGEKSGGEAGNSSAARSSAPTKLFGVHLSAAPCGAGSKRASSPEEHPPTSPATKPRLVLECDDLSLTVAPSSSSQQQLSAASSPTSTS	FLTKTYQLVDDPATDHIVSWGDDRVSTFVVWRPPEFARDILPNYFKHNNFSSFVRQLNTYGFRKVVPERWEFANEFFRKGEKQLLTEIHRRKTS	PFLTKTYQLVDDPATDHIVSWGDDRVSTFVVWRPPEFARDILPNYFKHNNFSSFVRQLNTYGFRKVVPERWEFANEFFRKGEKQLLTEIHRRKTSS	394
OsaHSF-10	Oryza sativa	LOC_Os01g54550.1	MEGGGGGGSLPPFLSKTYEMVDDPSTDAVVGWTPAGTSFVVANQPEFCRDLLPKYFKHNNFSSFVRQLNTYGFRKVDPEQWEFANEDFIKGQRHRLKNIHRRKPIFSHSSHSQGAGPLTDNERKDYEEEIERLKSDNAALSSELQNNTLKKLNMEKRMQALEEKLFVVEDQQRSLISYVREIVKAPGFLSSFVQQQDHHRKKRRLPIPISFHEDANTQENQIMPCDLTNSPAQTFYRESFDKMESSLNSLENFLREASEEFGNDISYDDGVPGPSSTVVLTELHSPGESDPRVSSPPTRMRTSSAGAGDSHSSRDVAESTSCAESPPIPQMHSRVDTRAKVSEIDVNSEPAVTETGPSRDQPAEEPPAVTPGANDGFWQQFLTEQPGSSDAHQEAQSER…	FLSKTYEMVDDPSTDAVVGWTPAGTSFVVANQPEFCRDLLPKYFKHNNFSSFVRQLNTYGFRKVDPEQWEFANEDFIKGQRHRLKNIHRRK	PFLSKTYEMVDDPSTDAVVGWTPAGTSFVVANQPEFCRDLLPKYFKHNNFSSFVRQLNTYGFRKVDPEQWEFANEDFIKGQRHRLKNIHRRKPI	440
OsaHSF-11	Oryza sativa	LOC_Os08g43334.1	MKGSRLAVKESCLPMTMPMPETFAQYSNPLRSTRAYGQLCRVPGRRRHACVDGWGQDRARTRGDDGQRRYAQCRGGWGDIWRWGGYITCGSPRETGMVNGAPSPPPPSPMVMSFGPLDSPWVKQPDTTVYPGQICAAAGGGGGMADQTAAAVVVGGGAAATMGEPSPPPPAPAAEAAGVGVGQQQRTVPTPFLTKTYQLVDDPAVDDVISWNDDGSTFVVWRPAEFARDLLPKYFKHNNFSSFVRQLNTYGFRKIVPDRWEFANDCFRRGERRLLCEIHRRKVTPPAPAATTAAVAAAIPMALPVTTTRDGSPVLSGEEQVISSSSSPEPPLVLPQAPSGSGSGGVASGDVGDENERLRRENAQLARELSQMRKLCNNILLLMSKYASTQQLDAANASS…	FLTKTYQLVDDPAVDDVISWNDDGSTFVVWRPAEFARDLLPKYFKHNNFSSFVRQLNTYGFRKIVPDRWEFANDCFRRGERRLLCEIHRRKV	PFLTKTYQLVDDPAVDDVISWNDDGSTFVVWRPAEFARDLLPKYFKHNNFSSFVRQLNTYGFRKIVPDRWEFANDCFRRGERRLLCEIHRRKVTP	616
OsaHSF-12	Oryza sativa	LOC_Os02g29340.1	MEVAAGARGGGAGGGGGGPAPFLLKTYEMVDDPSTDAVVSWSDASDASFVVWNHPEFAARLLPAYFKHSNFSSFIRQLNTYGFRKIDPERWEFANEYFIKGQKHLLKNIHRRKPIHSHSHPPGALPDNERAIFEDEIERLSREKSNLQADLWKSKQQQSGTMNQIEDLERRVLGMEQRQTKMIAFLQQASKNPQFVNKLVKMAEASSIFTDAFNKKRRLPGLDYSIENTETTSFYDDHSSTSKQETGNLLNQHFSDKLRLGLCPAMTESNIITLSTQSSNEDNRSPHGKHPECDMMGRECLPLVPQMMELSDTGTSICPSKSSCFAPPISDEGLLTCHLSLTLASCSMDVDKSQGLNANGTTIDNPTEAATATMEKDDTIDRSFDDNQKKSADSRTADA…	FLLKTYEMVDDPSTDAVVSWSDASDASFVVWNHPEFAARLLPAYFKHSNFSSFIRQLNTYGFRKIDPERWEFANEYFIKGQKHLLKNIHRRK	PFLLKTYEMVDDPSTDAVVSWSDASDASFVVWNHPEFAARLLPAYFKHSNFSSFIRQLNTYGFRKIDPERWEFANEYFIKGQKHLLKNIHRRKPIH	475
OsaHSF-13	Oryza sativa	LOC_Os10g28340.1	MDPAAAGIVKEEMLESQQQQRQEDGGAAPRPMEGLHEVGPPPFLTKTYDLVEDPATDGVVSWSRAGNSFVVWDPHVFADLLLPRLFKHNNFSSFVRQLNTYGFRKVDPDRWEFANEGFLRGQRHLLKTIKRRKPPSNAPPSQQQSLTSCLEVGEFGFEEEIDRLKRDKNILITEVVKLRQEQQATKDHVKAMEDRLRAAEQKQVQMMGFLARAMRNPEFFQQLAQQKEKRKELEDAISKKRRRPIDNVPFYDPGETSQTEQLDSPYLFDSGVLNELSEPGIPELENLAVNIQDLGKGKVDEERQNQTNGQAELGDDFWAELLVEDFTGKEEQSELDGKIDGIDELAQQLGYLSSTSPK	FLTKTYDLVEDPATDGVVSWSRAGNSFVVWDPHVFADLLLPRLFKHNNFSSFVRQLNTYGFRKVDPDRWEFANEGFLRGQRHLLKTIKRRKP	PFLTKTYDLVEDPATDGVVSWSRAGNSFVVWDPHVFADLLLPRLFKHNNFSSFVRQLNTYGFRKVDPDRWEFANEGFLRGQRHLLKTIKRRKPPS	358
OsaHSF-14	Oryza sativa	LOC_Os05g45410.1	MESSNLGGGGGGGGGGGPPPFLIKTYEMVEDAATNHVVSWGPGGASFVVWNPLDFSRDLLPKYFKHNNFSSFIRQLNTYGFRKIDPERWEFANEDFIRGHTHLLKNIHRRKPVHSHSLQNQINGPLAESERRELEEEINRLKYEKSILVADLQRQNQQQYVINWQMQAMEGRLVAMEQRQKNIVASLCEMLQRRGGAVSSSLLESDHFSKKRRVPKMDLFVDDCAAGEEQKVFQFQGIGTDAPAMPPVLPVTNGEAFDRVELSLVSLEKLFQRANDACTAAEEMYSHGHGGTEPSTAICPEEMNTAPMETGIDLQLPASLHPSSPNTGNAHLHLSTELTESPGFVQSPELPMAEIREDIHVTRYPTQADVNSEIASSTDTSQDGTSETEASHGPTNDVF…	FLIKTYEMVEDAATNHVVSWGPGGASFVVWNPLDFSRDLLPKYFKHNNFSSFIRQLNTYGFRKIDPERWEFANEDFIRGHTHLLKNIHRRKP	PFLIKTYEMVEDAATNHVVSWGPGGASFVVWNPLDFSRDLLPKYFKHNNFSSFIRQLNTYGFRKIDPERWEFANEDFIRGHTHLLKNIHRRKPVH	459
OsaHSF-15	Oryza sativa	LOC_Os03g53340.2	MNPLRVIVKEEELDFAAAAAAAAAGEGSPSSWAVGVMDLPRPMEGLGEAGPPPFLCKTYEVVDDPGTDTVISWGFAGNSFVVWDANAFAAVLLPRYFKHSNFSSFVRQLNTYGFRKVDPDRWEFANEGFLRGKKELLKTIKRRRPPPSSPPSSSSSSSSSQHQQQPAAACLEVGQFGRDGVVNRLQRDKSVLIAEVVKLRQEQQTTRAQMQAMEERISAAEQKQQQMTVFLARAMKNPGFLQMLVDRQAGQHGARNRVLEDALSKKRRRPIEYLLTRNGETCAAGESAAMLAADGVAEPDGDTTPRGDGGGGGGGDTESFWMQLLSLGLEEKQREDGVAGGVQESNSGGADVDNDEEDDDDDVDVLVQSIYHLSPK	FLCKTYEVVDDPGTDTVISWGFAGNSFVVWDANAFAAVLLPRYFKHSNFSSFVRQLNTYGFRKVDPDRWEFANEGFLRGKKELLKTIKRRR	PFLCKTYEVVDDPGTDTVISWGFAGNSFVVWDANAFAAVLLPRYFKHSNFSSFVRQLNTYGFRKVDPDRWEFANEGFLRGKKELLKTIKRRRPPP	376
OsaHSF-16	Oryza sativa	LOC_Os08g36700.1	MEWEEESEAARQKAAAASASVVPAPFLTKTYQLVDDPATDHVVSWEDDDGGESASSFVVWRPPEFARDILPNYFKHSNFSSFVRQLNTYGFRKVVPERWEFANEFFRKGEKQLLCEIHRRKSAAATWPPFPPPPPPFFAPRHFAAGAFFRHGDGMLHGRLGALVTTTERRHWFESAALPVAPSSRLLSQLGPVIAPARRAAATPEEEALMQENHRLLRGNAALVQELAHMRKLYSDIIYFVQNHVRPVAPSPAAAAALHGLGVLRPPPAGGKAPASEVRGASGRSATSSSSLTVAEDQPTLLALRLPRTTEKIINEVSGGNGGGSTKLFGVHLSSADEQTSSGASRKRSPPQEQPPTSPAPKRTLVVEHSELRLSIVSPP	FLTKTYQLVDDPATDHVVSWEDDDGGESASSFVVWRPPEFARDILPNYFKHSNFSSFVRQLNTYGFRKVVPERWEFANEFFRKGEKQLLCEIHRRKSA	PFLTKTYQLVDDPATDHVVSWEDDDGGESASSFVVWRPPEFARDILPNYFKHSNFSSFVRQLNTYGFRKVVPERWEFANEFFRKGEKQLLCEIHRRKSAA	380
OsaHSF-17	Oryza sativa	LOC_Os02g13800.1	MTTTTAEGGGGVAPFVAKTYRMVDDPATDGVIAWGRDSNSFVVADPFAFSQTLLPAHFKHSNFSSFVRQLNTYGFRKVDPDRWEFAHVSFLRGQTHLLRRIVRRSSGGGGAKRKEEAGGCGGGGEAAAGDVDEESAVVALEVARLRREQREIEGRVAAMWRRVQETERRPKQMLAFLVKVVGDPQVLRRLVDRDNTNAAASNADDSAVHHQVKRPRLLLDSSSTTTTHGDRHLVTAAADGFYAGGCGPEAAAAAAFVPDDAVDFTGLYTGGDGFGNAVVDAGVDYPPAYAFPVVDSGY	FVAKTYRMVDDPATDGVIAWGRDSNSFVVADPFAFSQTLLPAHFKHSNFSSFVRQLNTYGFRKVDPDRWEFAHVSFLRGQTHLLRRIVRRSS	PFVAKTYRMVDDPATDGVIAWGRDSNSFVVADPFAFSQTLLPAHFKHSNFSSFVRQLNTYGFRKVDPDRWEFAHVSFLRGQTHLLRRIVRRSSGG	298
OsaHSF-18	Oryza sativa	LOC_Os06g35960.1	MAAAAGGGAAPFVWKTYRMVEDPGTDGVIGWGKGNNSFVVADPFVFSQTLLPAHFKHNNFSSFVRQLNTYGFRKVDPDRWEFAHASFLRGQTHLLRNIVRRGSAAAGGGGGGGGGKRRDASADGGGGGGDEDMTMVATEVVRLKQEQRTIDDRVAAMWRRVQETERRPKQMLAFLLKVVGDRDKLHRLVGGGGNGNGAATAAAADNGFADAARAGCGEKRARLLLDGDNTGAFGPDAVDFAGFYTGADMFPDVAVDAAAAAAGGSAGCSFAFGVDSGY	FVWKTYRMVEDPGTDGVIGWGKGNNSFVVADPFVFSQTLLPAHFKHNNFSSFVRQLNTYGFRKVDPDRWEFAHASFLRGQTHLLRNIVRRGS	PFVWKTYRMVEDPGTDGVIGWGKGNNSFVVADPFVFSQTLLPAHFKHNNFSSFVRQLNTYGFRKVDPDRWEFAHASFLRGQTHLLRNIVRRGSAA	278
OsaHSF-19	Oryza sativa	LOC_Os01g53220.1	MMGGECKVHQLQAAGDGGPGAVAPFVAKTFHMVSDPSTNAVVRWGGAGNTFLVLDPAAFSDFLLPSYFKHRNFASFVRQLNTYGFRKVDPDRWEFAHESFLRGQAQLLPRIVRKKKKGGAAPGCRELCEEGEEVRGTIEAVQRLREEQRGMEEELQAMDQRLRAAESRPGQMMAFLAKLADEPGVVLRAMLAKKEELAAAGNNGSDPCKRRRIGADTGRGGVATGGDAAEMAQSRGTVPFPFSVLGQVFY	FVAKTFHMVSDPSTNAVVRWGGAGNTFLVLDPAAFSDFLLPSYFKHRNFASFVRQLNTYGFRKVDPDRWEFAHESFLRGQAQLLPRIVRKKKK	PFVAKTFHMVSDPSTNAVVRWGGAGNTFLVLDPAAFSDFLLPSYFKHRNFASFVRQLNTYGFRKVDPDRWEFAHESFLRGQAQLLPRIVRKKKKG	250
OsaHSF-20	Oryza sativa	LOC_Os03g12370.1	MGSKKRSPQHPAAAAPPPAVGGGGGGEVSGDGGASTANGPVVPKPSEVAPFLTKVYDMVSDPATDNVISWAEGGGSFVIWDSHAFERDLHRHFKHSNFTSFIRQLNTYGFRKVHPDRWEWANEGFIMGQKHLLKTIKRRKKSSQESPSEIQKAPVKTAPGTENIEIGKYGGLEKEVETLKRDKALLMQQLVDLRHYQQTSNLEVQNLIERLQVMEQNQQQMMALLAIVVQNPSFLNQLVQQQQQQRRSNWWSPDGSKKRRFHALEQGPVTDQETSGRGAHIVEYLPPVPETSGQVNPVEGAICSANSQPVPSPAVATPMDMQTSNVADTLGSSEEPFADNSTLHEWDDNDMQLLFDDNLDPILPPFENDGQMGPPLSVQDYDFPQLEQDCLMEAQYNSN…	FLTKVYDMVSDPATDNVISWAEGGGSFVIWDSHAFERDLHRHFKHSNFTSFIRQLNTYGFRKVHPDRWEWANEGFIMGQKHLLKTIKRRKKS	PFLTKVYDMVSDPATDNVISWAEGGGSFVIWDSHAFERDLHRHFKHSNFTSFIRQLNTYGFRKVHPDRWEWANEGFIMGQKHLLKTIKRRKKSS	410
OsaHSF-21	Oryza sativa	LOC_Os01g39020.1	MLKPQTPRARRAAHPNSHMASSSSSSSLCRLLIPRPTTRRFSGGGGEGGMAAAAPVKREVKPEAGEGWGGGDLGVVPPPPRPMEGLGEAGPAPFVAKTYEMVADAATDAVVSWGPGGSGASFVVWDPHALAAGVLPRFFKHANFSSFVRQLNTYGFRKVTPDRWEFANEAFLAGQKHLLKNIKRRRVSKPLVDSQLRNKASVVFGQPEAPGEVVSLKRDRAALRAEVIMLKQQYNACKSQLIAMEEMVRNIERRQQQTIGFFAKVLTNPAFVQQVLLNYVNKNGLRGAAKRQRLMENEEQHADSPLNKGMEAASVMEADVSPGSTGCGTVGKVETTPMCNFQNIENMCDDVWEELDALPETGMEQEEKAGIGSFDVEEFVGRPCGWVDDCPYLVEPMQF…	FVAKTYEMVADAATDAVVSWGPGGSGASFVVWDPHALAAGVLPRFFKHANFSSFVRQLNTYGFRKVTPDRWEFANEAFLAGQKHLLKNIKRRRVS	PFVAKTYEMVADAATDAVVSWGPGGSGASFVVWDPHALAAGVLPRFFKHANFSSFVRQLNTYGFRKVTPDRWEFANEAFLAGQKHLLKNIKRRRVSK	402
OsaHSF-22	Oryza sativa	LOC_Os09g28354.1	MAAAEAAAAVGKQQQKGGGGRGGGGGGPAPFLTKTNQMVEESATDEVISWGKEGRSFVVWKPVEFARDLLPLHFKHCNFSSFVRQLNTYGFRKVVPDRWEFANGNFRRGEQGLLSGIRRRKATTPQSSKSCGSGVNVAFPPPLPPLPPEPSATTSSGNDRSSSSASSPPRADITSENEQLRKDNQTLTMELARARRHCEELLGFLSRFLDVRQLDLRLLMQEDMRAAAGGVGGEQRVQEHAREEKCVKLFGVLLDDTHGAATRKRARCEEAAASERPIKMIRIGEPWVSVPSSGPARCGGDN	FLTKTNQMVEESATDEVISWGKEGRSFVVWKPVEFARDLLPLHFKHCNFSSFVRQLNTYGFRKVVPDRWEFANGNFRRGEQGLLSGIRRRKAT	PFLTKTNQMVEESATDEVISWGKEGRSFVVWKPVEFARDLLPLHFKHCNFSSFVRQLNTYGFRKVVPDRWEFANGNFRRGEQGLLSGIRRRKATT	302
OsaHSF-23	Oryza sativa	LOC_Os06g36930.1	MDYSTVKQEEVEVVVLDGEEEAAAAAAPVPLPAAMGVGAAVAPFLVKTFEMVEDPATDAVVSWGGAARNSFVVWDPHAFAAGLLPLHFKHANFSSFLRQLNTYGFRKVSADRWEFANEDFLGGQRHLLANIRRRRRGAGTGSTTPRAVNCGGGGGEGEVERLRRDKEALARELARLRRQQQEARAQLLDMERRVRGTERRQEQCTEFLARALRSPDVLDNIARRHAAAVERKKRRMLAAAADDDGLTFEALALAAAADTSHSTGGAVTTDMIWYELLGEEQAEIDIEVDQLVASASAAADTASEAEPWEEMGEEEVQELVQQIDCLASPSS	FLVKTFEMVEDPATDAVVSWGGAARNSFVVWDPHAFAAGLLPLHFKHANFSSFLRQLNTYGFRKVSADRWEFANEDFLGGQRHLLANIRRRRR	PFLVKTFEMVEDPATDAVVSWGGAARNSFVVWDPHAFAAGLLPLHFKHANFSSFLRQLNTYGFRKVSADRWEFANEDFLGGQRHLLANIRRRRRGA	331
OsaHSF-24	Oryza sativa	LOC_Os01g43590.1	MDGLHTELALGLIGCCGGDGQQQTAPFVAKTYQMVCDPRTDALVRWGRDNNSFVVVDPAAFSQLLLPCFFKHGNFSSFVRQLNTYVSIIQSPAPGFRKVHPDRWEFAHESFLRGQTHLLPRIVRRKKRGEGGGGGGGASCSFGGGAGEHQVAAAAASVGMSGEEEDAAEDVLAKEAALFEEVQRLRHEQTAIGEELARMSQRLQATERRPDQLMSFLAKLADDPNAVTGHLLEQAAERKRRRQHLPSHEPTVCPLPPAPPPQPPQPLLALAGAAAMDGTYWWTTEHHHHHHHQMKPMTVLPSLEPPTASCGVHQVPELGGGGVMGLTTDGEAKVEPPFPFCLLGQAFF	FVAKTYQMVCDPRTDALVRWGRDNNSFVVVDPAAFSQLLLPCFFKHGNFSSFVRQLNTYVSIIQSPAPGFRKVHPDRWEFAHESFLRGQTHLLPRIVRRKK	PFVAKTYQMVCDPRTDALVRWGRDNNSFVVVDPAAFSQLLLPCFFKHGNFSSFVRQLNTYVSIIQSPAPGFRKVHPDRWEFAHESFLRGQTHLLPRIVRRKKRG	348
OsaHSF-25	Oryza sativa	LOC_Os03g06630.1	MEKMMPGMVKEEWPPSSPEEGEAPRPMEGLHEVGPPPFLTKTFDLVADPATDGVVSWGRAGSSFVVWDPHVFAAVFLPRFFKHNNFSSFVRQLNTYFLVRTNYLNKRSHFYSLRFQGFRKIDPDRWEFANDGFLRGQRHLLKMIKRRRPLSYLPGSQQALGTCLEVGQFGLDEEIDRLKRDKNILLAEVVKLRHKQQSTKANMRAMEERLQHAEQKQVQMMGFLARAMQNPDFFHQLIHQQDKMKGLEDTFSKKRTRSIDIVPFLNPGEVSQGDQLESTLLFDPRPFAELNDEPAKSELENLALNIQGLGKGKQDVNRTRNQPRNQASNETELTDDFWEELLNEGARDDAGIPGMERRRPRYVDALAQKLGYLSNSSQK	FLTKTFDLVADPATDGVVSWGRAGSSFVVWDPHVFAAVFLPRFFKHNNFSSFVRQLNTYFLVRTNYLNKRSHFYSLRFQGFRKIDPDRWEFANDGFLRGQRHLLKMIKRRR	PFLTKTFDLVADPATDGVVSWGRAGSSFVVWDPHVFAAVFLPRFFKHNNFSSFVRQLNTYFLVRTNYLNKRSHFYSLRFQGFRKIDPDRWEFANDGFLRGQRHLLKMIKRRRPLS	379
*The number of amino acids in GSVIVT01021040001 were not calculated due to a large amount of ambiguous X.

## Sheet: S4
Table S4. Orthologs, coorthologs and paralogs gene pairs among SlyHSF genes
Protein 1	Protein 2	Index	Type
AT3G02990	AT5G16820	1.156	inparalog
AT3G51910	AT3G63350	0.679	inparalog
AT4G18880	AT5G45710	0.844	inparalog
LOC_Os02g13800.1	LOC_Os06g35960.1	0.711	inparalog
LOC_Os03g06630.1	LOC_Os03g58160.1	0.917	inparalog
LOC_Os03g06630.1	LOC_Os07g08140.1	0.971	inparalog
LOC_Os03g06630.1	LOC_Os10g28340.1	1.192	inparalog
LOC_Os03g25120.1	LOC_Os07g44690.1	0.836	inparalog
LOC_Os03g58160.1	LOC_Os07g08140.1	1.354	inparalog
LOC_Os03g58160.1	LOC_Os10g28340.1	0.956	inparalog
LOC_Os07g08140.1	LOC_Os10g28340.1	1.049	inparalog
LOC_Os08g36700.1	LOC_Os09g28200.1	0.743	inparalog
LOC_Os08g43334.1	LOC_Os09g35790.1	0.931	inparalog
Solyc02g072000.2.1	Solyc03g006000.2.1	1.117	inparalog
Solyc03g097120.2.1	Solyc06g072750.2.1	1.117	inparalog
Solyc04g016000.2.1	Solyc10g079380.1.1	0.648	inparalog
Solyc08g005170.2.1	Solyc08g076590.2.1	1.117	inparalog
AT1G32330	LOC_Os03g63750.1	1.542	ortholog
AT1G46264	LOC_Os07g44690.1	0.973	ortholog
AT3G22830	LOC_Os10g28340.1	1.278	ortholog
AT3G24520	LOC_Os01g53220.1	0.721	ortholog
AT4G11660	LOC_Os09g35790.1	0.839	ortholog
AT4G13980	LOC_Os02g29340.1	1.409	ortholog
AT4G36990	LOC_Os09g28354.1	0.625	ortholog
AT5G03720	LOC_Os02g32590.1	0.775	ortholog
AT5G45710	LOC_Os01g54550.1	1.019	ortholog
AT5G62020	LOC_Os09g35790.1	0.819	ortholog
AT1G32330	Solyc08g005170.2.1	1.391	ortholog
AT1G46264	Solyc04g078770.2.1	0.989	ortholog
AT1G67970	Solyc09g059520.2.1	0.741	ortholog
AT2G26150	Solyc08g062960.2.1	1.09	ortholog
AT2G41690	Solyc04g016000.2.1	0.588	ortholog
AT3G22830	Solyc09g065660.2.1	1.139	ortholog
AT3G24520	Solyc12g007070.1.1	0.861	ortholog
AT4G11660	Solyc08g080540.2.1	0.943	ortholog
AT4G13980	Solyc12g098520.1.1	1.519	ortholog
AT4G18880	Solyc02g072000.2.1	1.075	ortholog
AT4G36990	Solyc02g090820.2.1	0.842	ortholog
AT5G03720	Solyc09g009100.2.1	0.786	ortholog
AT5G16820	Solyc03g097120.2.1	1.27	ortholog
AT5G62020	Solyc03g026020.2.1	0.766	ortholog
LOC_Os01g54550.1	Solyc03g006000.2.1	1.054	ortholog
LOC_Os02g13800.1	Solyc12g007070.1.1	0.68	ortholog
LOC_Os02g29340.1	Solyc12g098520.1.1	1.311	ortholog
LOC_Os02g32590.1	Solyc09g009100.2.1	0.811	ortholog
LOC_Os03g63750.1	Solyc08g005170.2.1	1.606	ortholog
LOC_Os07g08140.1	Solyc09g065660.2.1	1.214	ortholog
LOC_Os07g44690.1	Solyc04g078770.2.1	0.87	ortholog
LOC_Os09g28354.1	Solyc02g090820.2.1	0.649	ortholog
LOC_Os09g35790.1	Solyc03g026020.2.1	0.805	ortholog
AT1G46264	LOC_Os03g25120.1	0.894	co-ortholog
AT3G22830	LOC_Os03g06630.1	1.115	co-ortholog
AT3G22830	LOC_Os03g58160.1	1.184	co-ortholog
AT3G22830	LOC_Os07g08140.1	1.24	co-ortholog
AT4G11660	LOC_Os08g43334.1	0.796	co-ortholog
AT4G18880	LOC_Os01g54550.1	0.98	co-ortholog
AT5G62020	LOC_Os08g43334.1	0.791	co-ortholog
AT1G32330	Solyc08g076590.2.1	1.164	co-ortholog
AT2G41690	Solyc10g079380.1.1	0.563	co-ortholog
AT3G02990	Solyc03g097120.2.1	1.178	co-ortholog
AT3G02990	Solyc06g072750.2.1	1.052	co-ortholog
AT4G18880	Solyc03g006000.2.1	1.024	co-ortholog
AT5G16820	Solyc06g072750.2.1	1.19	co-ortholog
AT5G45710	Solyc02g072000.2.1	0.964	co-ortholog
AT5G45710	Solyc03g006000.2.1	0.866	co-ortholog
LOC_Os01g54550.1	Solyc02g072000.2.1	0.964	co-ortholog
LOC_Os03g06630.1	Solyc09g065660.2.1	1.087	co-ortholog
LOC_Os03g25120.1	Solyc04g078770.2.1	0.826	co-ortholog
LOC_Os03g58160.1	Solyc09g065660.2.1	1.107	co-ortholog
LOC_Os03g63750.1	Solyc08g076590.2.1	1.437	co-ortholog
LOC_Os06g35960.1	Solyc12g007070.1.1	0.674	co-ortholog
LOC_Os08g43334.1	Solyc03g026020.2.1	0.753	co-ortholog
LOC_Os10g28340.1	Solyc09g065660.2.1	1.152	co-ortholog

## Sheet: S5
Table S5. Expression of SlyHSF in different cultivars and tissues
ID	Name	Heinz_bud	Heinz_flower	Heinz_leaf	Heinz_root	Heinz_1cm_fruit	Heinz_2cm_fruit	Heinz_3cm_fruit	Heinz_MG	Heinz_B	Heinz_B10	Pimp_IM	Pimp_B	Pimp_B5	Pimp_leaf
SlyHSF-01	Solyc11g064990.1.1	0.17	0	0	0.14	0	0	0	0	0	0.67	0	0	0.14	0
SlyHSF-02	Solyc08g005170.2.1	10.59	14.31	8.27	18.62	11.62	13.21	15.38	12.46	13.83	13.72	16.27	16.56	17.94	9.66
SlyHSF-03	Solyc03g026020.2.1	19.8	34.61	25.08	38.03	19.66	36.7	124.86	74.57	125.88	49.63	69.45	96.33	171.43	5.8
SlyHSF-04	Solyc03g097120.2.1	8.54	14.05	7.56	14.59	9.22	11.57	18.66	26.96	35.72	59.36	0.14	0	0.14	0.04
SlyHSF-05	Solyc02g090820.2.1	51.98	127.4	21.45	76.94	22.51	23.36	23.2	41.54	62.79	132.95	45.2	65.21	99.32	2.29
SlyHSF-06	Solyc09g065660.2.1	3.72	3.98	0.24	8.53	9.07	13.27	1.47	3.49	5.26	9.27	0.67	4.24	1.87	0.09
SlyHSF-07	Solyc04g078770.2.1	1.48	0.25	1	6.24	1.55	0.63	0.2	0.13	0	0	0.16	0.04	0	2.12
SlyHSF-08	Solyc06g072750.2.1	2.14	3.43	2.15	3.11	2.84	2.55	2.65	3.19	3.91	4.18	3.97	7.12	7.94	3.54
SlyHSF-09	Solyc12g098520.1.1	10.69	23.04	6.7	35.13	13.43	29	78.67	47.88	45.79	33.58	51.04	40.24	54.04	3.67
SlyHSF-10	Solyc08g080540.2.1	6.43	4.88	4.92	3.58	8.29	7.89	12.27	16.19	7.78	23.08	7.85	11.33	9.77	0.14
SlyHSF-11	Solyc04g016000.2.1	6.18	0.96	0.19	24.21	1.09	1.99	0.52	2.63	0	0.39	0.61	2.04	0.12	0
SlyHSF-12	Solyc12g007070.1.1	3.93	66.72	19.95	33.16	21.83	17.43	41.58	14.82	71.92	47.1	45.71	100.68	71.09	6.85
SlyHSF-13	Solyc09g082670.2.1	0.15	1.07	1.51	1.12	0.04	0	0.04	0	0	0	0.23	0.04	0	7.33
SlyHSF-14	Solyc06g053960.2.1	3.1	5.47	2.58	16.13	7.22	35.32	75.85	120.81	432.2	227.11	276.25	350.2	337.83	1.09
SlyHSF-15	Solyc08g076590.2.1	2.11	2.14	3.52	6.38	1.88	2.73	1.53	0.55	0.5	0.39	0.45	0.58	0.64	4.38
SlyHSF-16	Solyc09g059520.2.1	10.09	11.71	9.5	13.7	14.55	17.79	18.68	29.12	17.19	25.14	20.79	19.61	14.46	12.79
SlyHSF-17	Solyc02g072000.2.1	3.58	2.91	2.36	4.52	3.27	5.28	6.54	6.29	13.31	20.95	4.44	5.77	4.06	1.5
SlyHSF-18	Solyc08g062960.2.1	3.45	7.29	22.27	4.51	36.77	36.11	147.92	45.21	89.78	62.13	125.71	149.66	163.72	12.19
SlyHSF-19	Solyc10g079380.1.1	0	0	0.07	0.54	0.08	0.18	0	0.07	0	0.1	0	0.25	0	0
SlyHSF-20	Solyc03g006000.2.1	3.49	4.61	5.6	12.4	3.2	5.79	7.22	8.84	11.82	16.85	12.84	10.56	12.07	3.76
SlyHSF-21	Solyc07g055710.2.1	0.15	0.72	2.25	2.78	0.45	1.38	0.57	4.19	1.16	0.34	0.69	0.78	0.53	0.08
SlyHSF-22	Solyc07g040680.2.1	3.31	7.82	1.84	0	7.26	15.04	24.09	10.88	16.1	18.72	31.39	28.96	39.85	0.3
SlyHSF-23	Solyc02g078340.2.1	0.13	0.68	0	0.08	0.18	0.4	0.22	0.38	0.07	2.15	0.4	2.24	3.52	0
SlyHSF-24	Solyc09g009100.2.1	16.3	25.11	34.31	19.68	22.56	25.4	38.51	39.29	21.9	24.8	22.12	5.41	6.34	41.71
SlyHSF-25	Solyc02g079180.1.1	2.29	4.44	0	0	0.48	0.05	0.04	0	0.04	0	0	0	0	0.35
SlyHSF-26	Solyc02g072060.1.1	0	0	0	0.05	0	0	0	0	0	0	0	0	0	0

## Sheet: S6
Table S6. qPCR primers for SlyHSF expression profile
ID	5'Primer	3'Primer
Sly-Actin	AGGAACACCCTGTTCTCCTGACTG	CAGAGAAAGCACAGCCTGGATAG
SlyHSF-01	GAATCTCTACAATGACATTATCT	ATTCAGACCTCCATTAAGTAA
SlyHSF-02	CGTATGATATGGTGGATGA	GCTGGAGAAGTTATTATGC
SlyHSF-03	TGTATCTACCTCTGATTCCT	CTTCATTTGGTTCAACTCTT
SlyHSF-04	CTAACAATTCTCTAGGCAGTA	CAGATATGATGGATGAACAAG
SlyHSF-05	TGACATAGGTTCAAGTTCTAC	CTCATTCTCATCCGACAAG
SlyHSF-06	GTCCTAGTGCTACATTACA	TTCTTGCTCTACCATATCC
SlyHSF-07	TAACACCAACAACATCGTA	TATTATCACCACCATTACCTT
SlyHSF-08	ATTAGAGACTGGTGGTATATC	AGATGAGATTGTGAAGAAGT
SlyHSF-09	TTAAGAACATCCATCGTAGAA	TGAACCTTGAGACATTAGC
SlyHSF-10	CGATGTTAAGGACCACTAC	AACTTCTCAACCGATTCAA
SlyHSF-11	GGAGTTCAGTAATGATAAGT	TGAAGTTGATGATGATGAT
SlyHSF-12	GCTCAATACTTATGGATTCAG	TTCCTCACTATGTTCTTCAA
SlyHSF-13	GCTTGAGATAGATGGAGAG	TGTAGTCTGTTGATGTTGT
SlyHSF-14	TTGGGAATTTGCTAATGAAG	ATGACGAAGACTTGATGAA
SlyHSF-15	GACTTATGATATGGTTGATGAC	CTGGAGAAGTTACTATGCTTA
SlyHSF-16	TCCTTCATTGTTATGGCTAT	ATCATCTTCAACTTCACTCA
SlyHSF-17	AACACTTATGGATTCAGGAA	TACGCCTATGGATATTCTTC
SlyHSF-18	CAGCCTATGAATTACTCCT	GGTTCCATATCAGTTCCAT
SlyHSF-19	AGGACAAACAAACAACAAC	ATTCTCATCAACAAGGCTAT
SlyHSF-20	TTCATAGCCTCTCATCATC	TTATGCCTGTGTAGAACTAA
SlyHSF-21	CAACAGTTCTTAACAGAGA	CGATTCCACCAATATCTAT
SlyHSF-22	TGATGAAGATGACATTATTGG	ATGAGATTATAGAGTCGGTATT
SlyHSF-23	CATTCGTCAACTTAATACCTAC	AATACACTTGGCTCACATT
SlyHSF-24	GAAGCAGATGGTTTCATTC	CCTCATTGTTCTTGGACTA
SlyHSF-25	GCAAGTAATAGAAGAGTTAGAG	TTCAAGTTCATCTCATCCA
SlyHSF-26	AGATTGAGGAGATGGTAGA	AGGTCCATAGTTGAAGATAAG

## Sheet: S7
Table S7. Expression of SlyHSF genes under heat stress treatment
ID	0 Hour	1 Hour	2 Hour	6 Hour	12 Hour	24 Hour
SlyHSF-01	0.00144856	0.000373285	0.00102398	0.000644827	0.000775295	0.000374928
SlyHSF-02	0.0970093	0.0866234	0.0798646	0.0741779	0.101379	0.0578502
SlyHSF-03	0.18971	0.405395	0.433108	0.0524432	0.367267	0.404908
SlyHSF-04	0.177317	0.464162	0.234702	0.127211	0.211745	0.315264
SlyHSF-05	0.222082	1.57815	0.368763	0.272652	0.640128	0.753981
SlyHSF-06	0.249688	1.72939	0.433329	0.0360781	0.0872501	0.117984
SlyHSF-07	0.0441544	0.0329419	0.0382985	0.0497877	0.071079	0.0496636
SlyHSF-08	0.0542613	0.0903248	0.0678159	0.0937199	0.114512	0.129378
SlyHSF-09	0.113034	0.172747	0.153726	0.0338258	0.135253	0.188217
SlyHSF-10	0.198907	0.93703	0.315818	0.069795	0.132027	0.220263
SlyHSF-11	0.00010721	0.000100536	0.000520169	0.000889532	0.00044632	0.000422371
SlyHSF-12	0.129576	0.0504128	0.0443712	0.132106	0.432378	0.0856086
SlyHSF-13	0.00138868	0.0104176	0.0044331	0.0164751	0.109801	0.0112092
SlyHSF-14	0.00374591	0.00111413	0.00212096	0.000393304	0.0311642	0.00320869
SlyHSF-15	0.259751	0.287759	0.195341	0.165978	0.268334	0.203392
SlyHSF-16	0.366732	0.404515	0.358829	0.187492	0.440211	0.45864
SlyHSF-17	0.0471957	0.104879	0.061105	0.00868094	0.0999165	0.136866
SlyHSF-18	0.0333994	5.24909	0.124911	0.308662	0.742227	0.479854
SlyHSF-19	0.00366993	0.000151272	0.00152075	0.00638086	0.00120368	0.00032222
SlyHSF-20	0.0703324	0.121593	0.0860071	0.0256523	0.13113	0.137138
SlyHSF-21	0.00196721	0.00677561	0.0188477	0.00454901	0.053746	0.0256168
SlyHSF-22	0.0705684	0.0478844	0.0957799	0.00863493	0.0041088	0.0250201
SlyHSF-23	1.16619e-05	0.000922178	0.000400716	0.000296983	0.00019667	0.000176942
SlyHSF-24	0.276829	0.468959	0.598587	0.582905	0.667682	0.576636
SlyHSF-25	0.00271412	0.00586332	0.00242332	0.000843319	0.0140411	0.00853575
SlyHSF-26	0.000659351	0.000101444	0.00024496	0.000856753	0.000261494	0.000158013
